# Supplementary material for: Eco-efficient, regioselective and rapid access to 4,5-disubstituted 1,2,3-thiadiazoles via [3 + 2] cycloaddition of α-enolicdithioesters with tosyl azide under solvent-free conditions
Source: Royal Society of Chemistry journal article supplement (doi:10.1039/c3gc37047j), 2013-01-01

# Eco-efficient, regioselective and rapid access to 4, 5-disubstituted 1,2,3-thiadiazoles via [3+2] cycloaddition of $\alpha$ -enolicdithioesters with tosyl azide under solvent-free conditions

Maya Shankar Singh,<sup>\*a</sup> Anugula Nagaraju,<sup>a</sup> Girijesh Kumar Verma,<sup>a</sup> Gaurav Shukla,<sup>a</sup> Rajiv Kumar Verma,<sup>a</sup> Abhijeet Srivastava<sup>a</sup> and Keshav Raghuvanshi<sup>b</sup>

<sup>a</sup> Department of Chemistry, Faculty of Science, Banaras Hindu University, Varanasi-221005, India.

Fax: +91-542-2368127; Tel: +91-542-6702502; E-mail: [mssinghbhu@yahoo.co.in](mailto:mssinghbhu@yahoo.co.in)

<sup>b</sup> Institut für Organische und Biomolekulare Chemie, Georg-August-Universität, Tammannstrasse 2, 37077 Göttingen, Germany

| INDEX:                                       | Page No. |
|----------------------------------------------|----------|
| <sup>1</sup> H & <sup>13</sup> C NMR Spectra | S2-S61   |

1)  $^1\text{H}$  &  $^{13}\text{C}$  NMR Spectra of 4-Benzoyl-5-methylsulfanyl-1,2,3-thiadiazole (3aa):

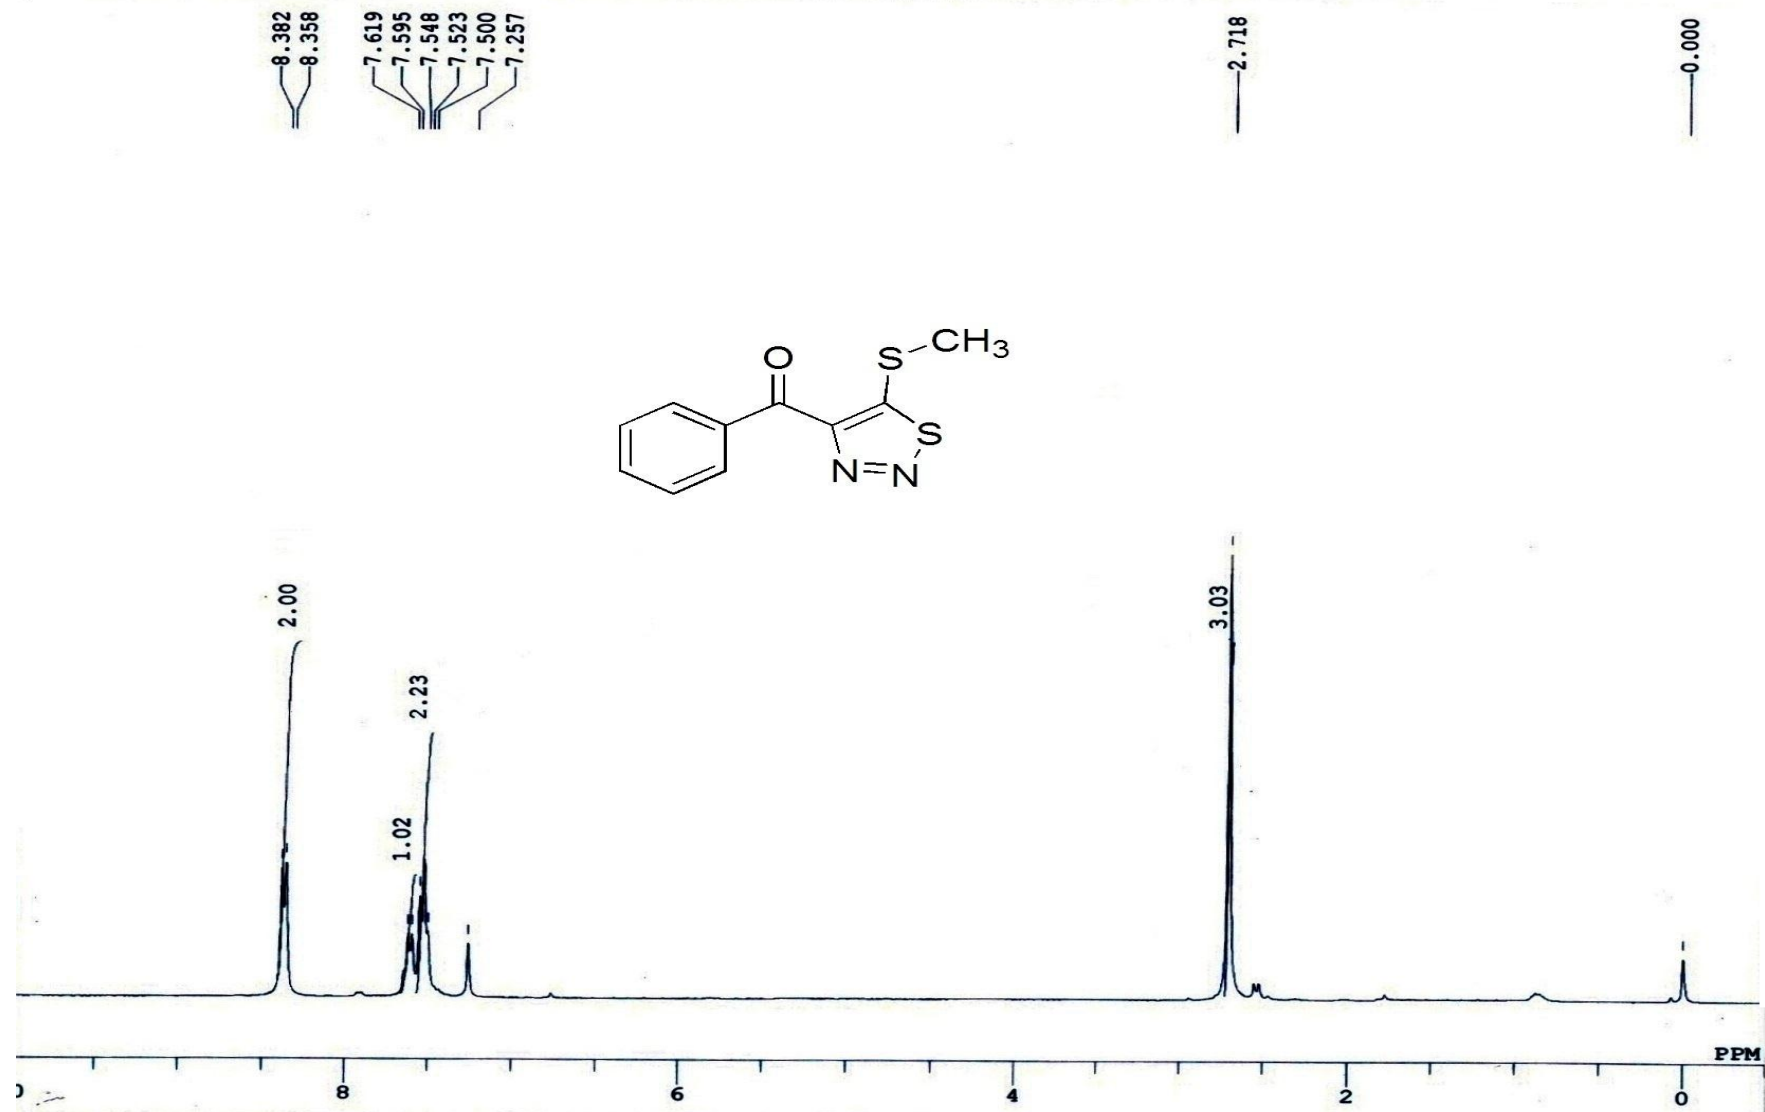

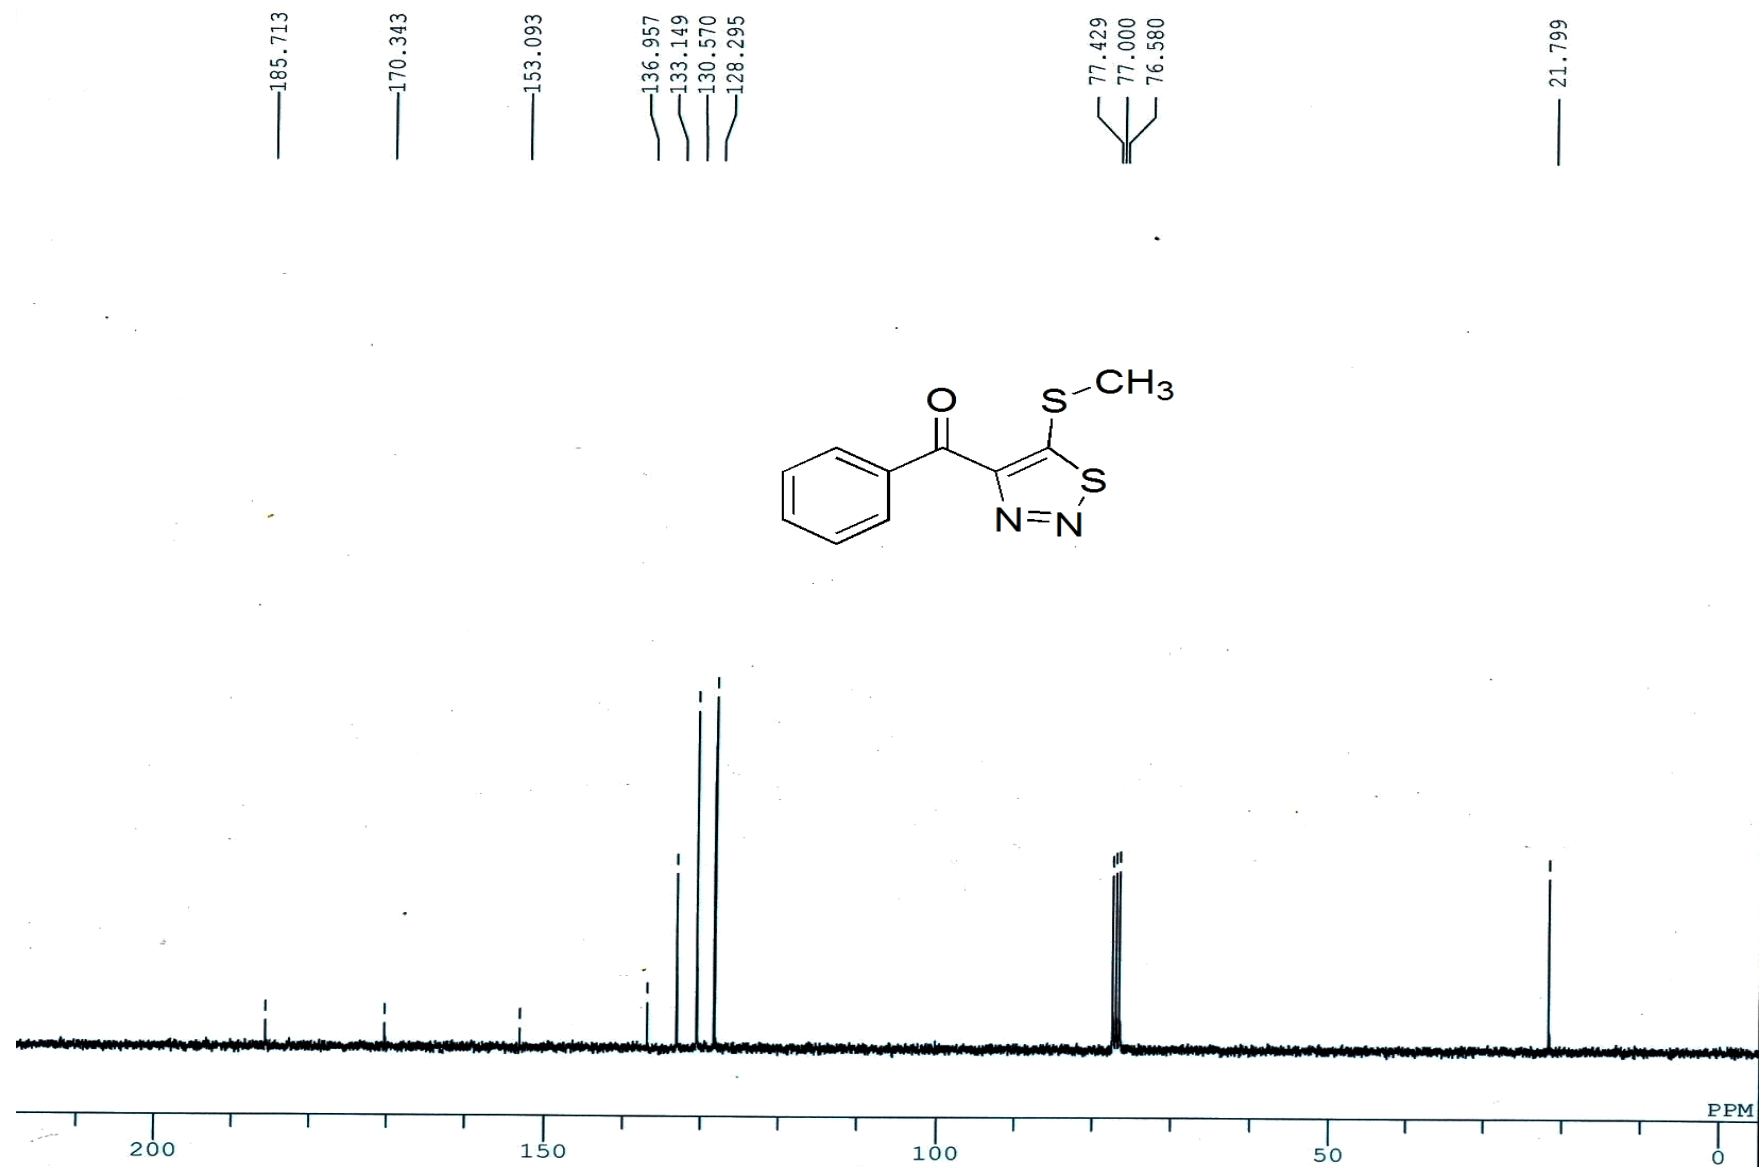

2)  $^1\text{H}$  &  $^{13}\text{C}$  NMR Spectra of 4-(4-Methylbenzoyl)-5-methylsulfanyl-1,2,3-thiadiazole (3ab):

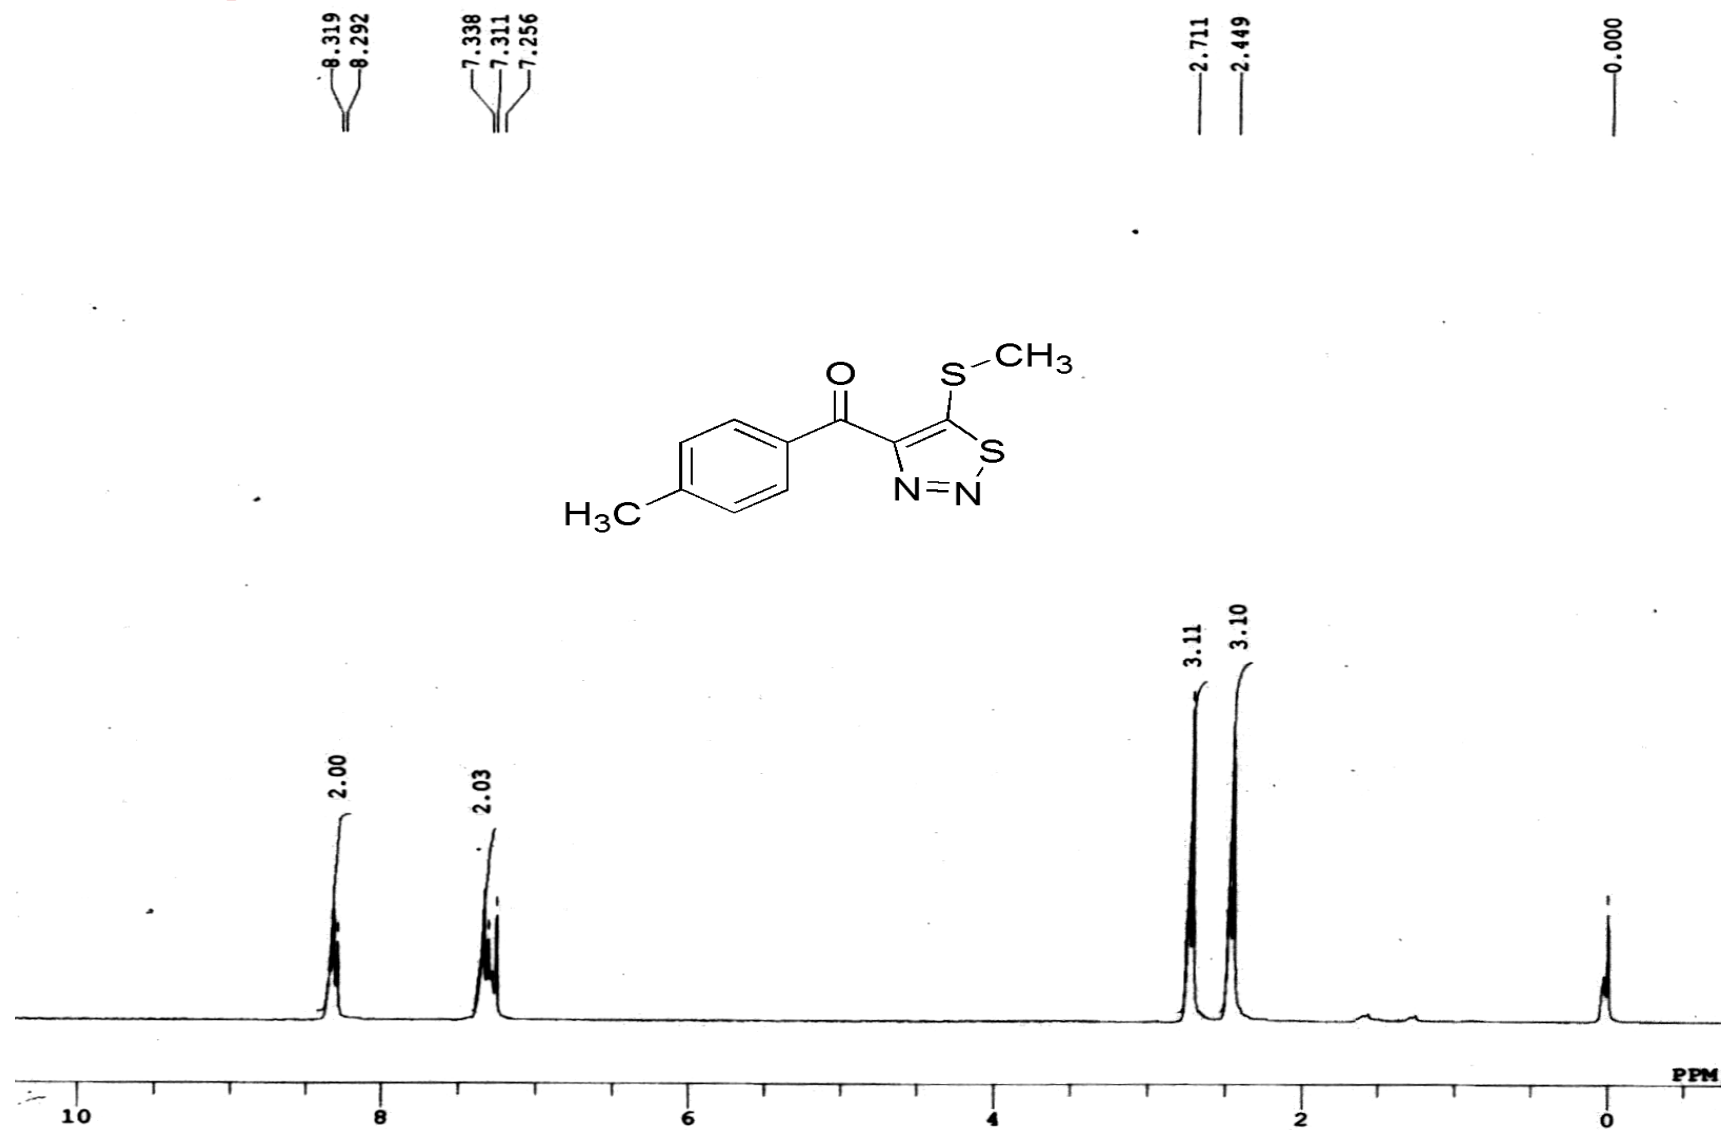

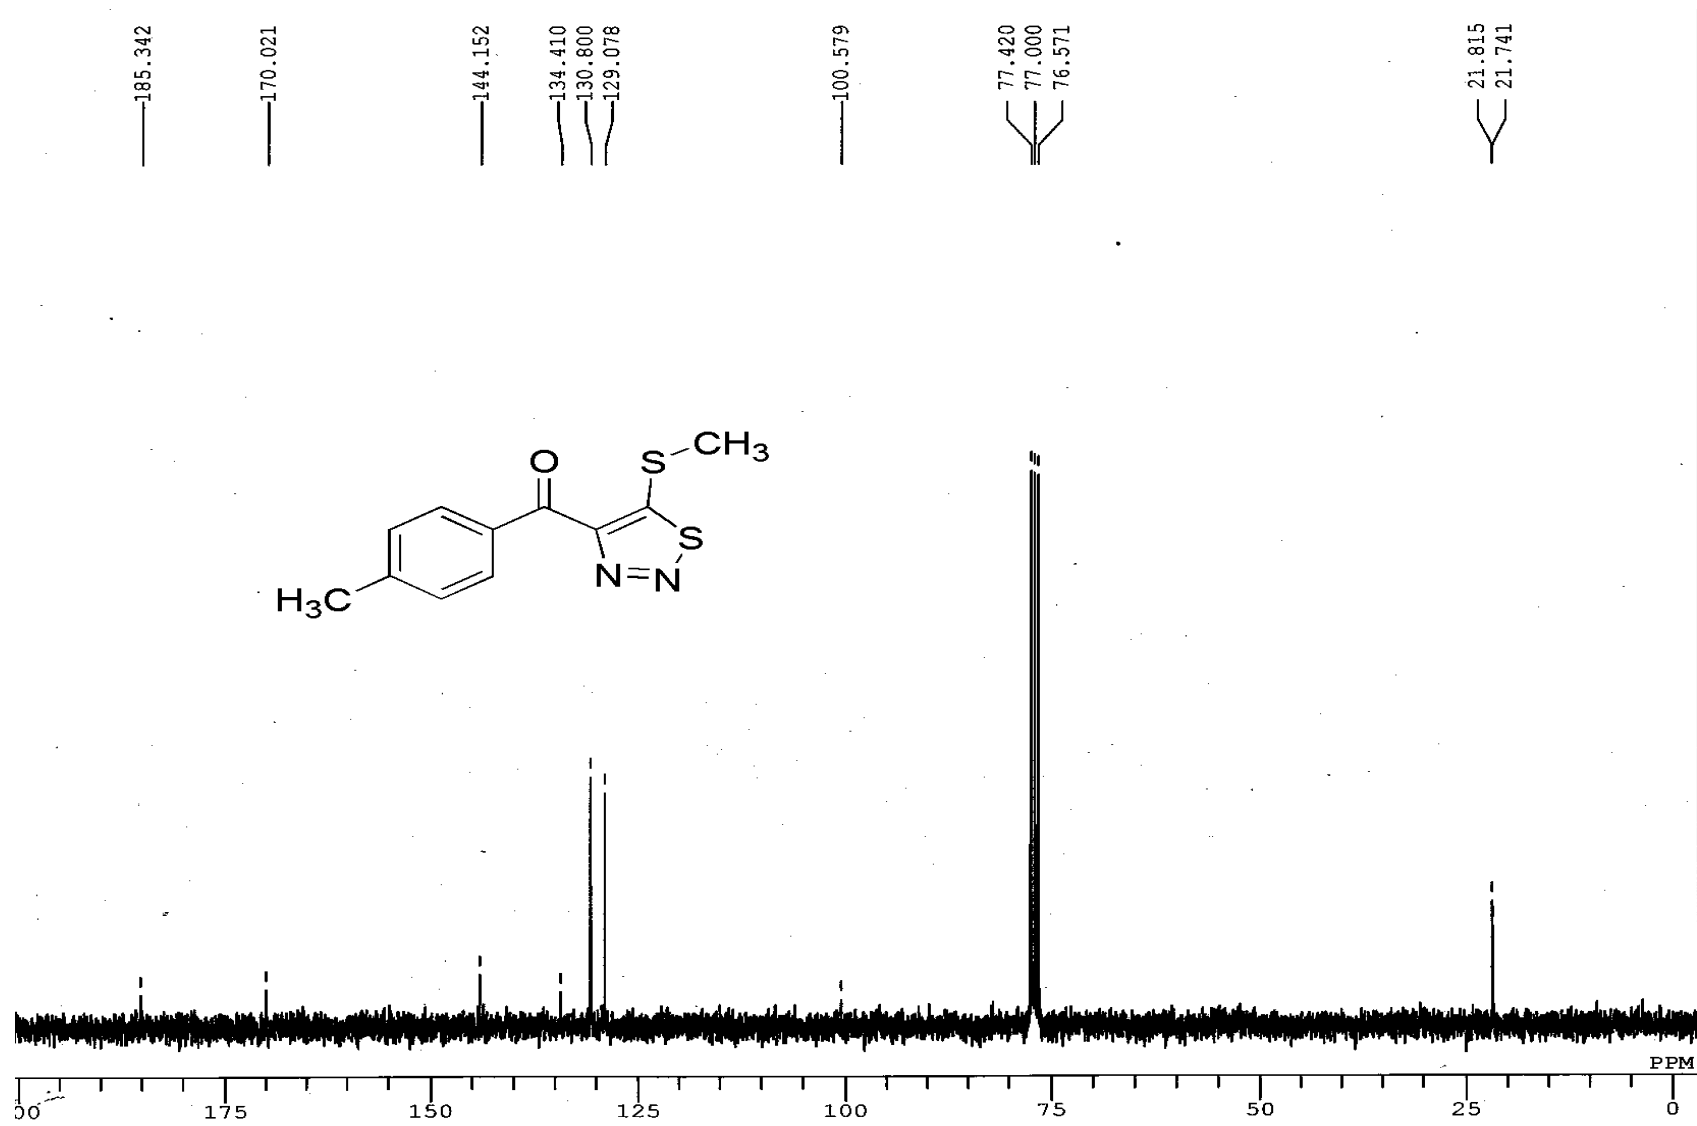

### 3) $^1\text{H}$ & $^{13}\text{C}$ NMR Spectra of 5-Methylsulfanyl-4(4-trifluoromethylbenzoyl)-1,2,3-thiadiazole (3ac):

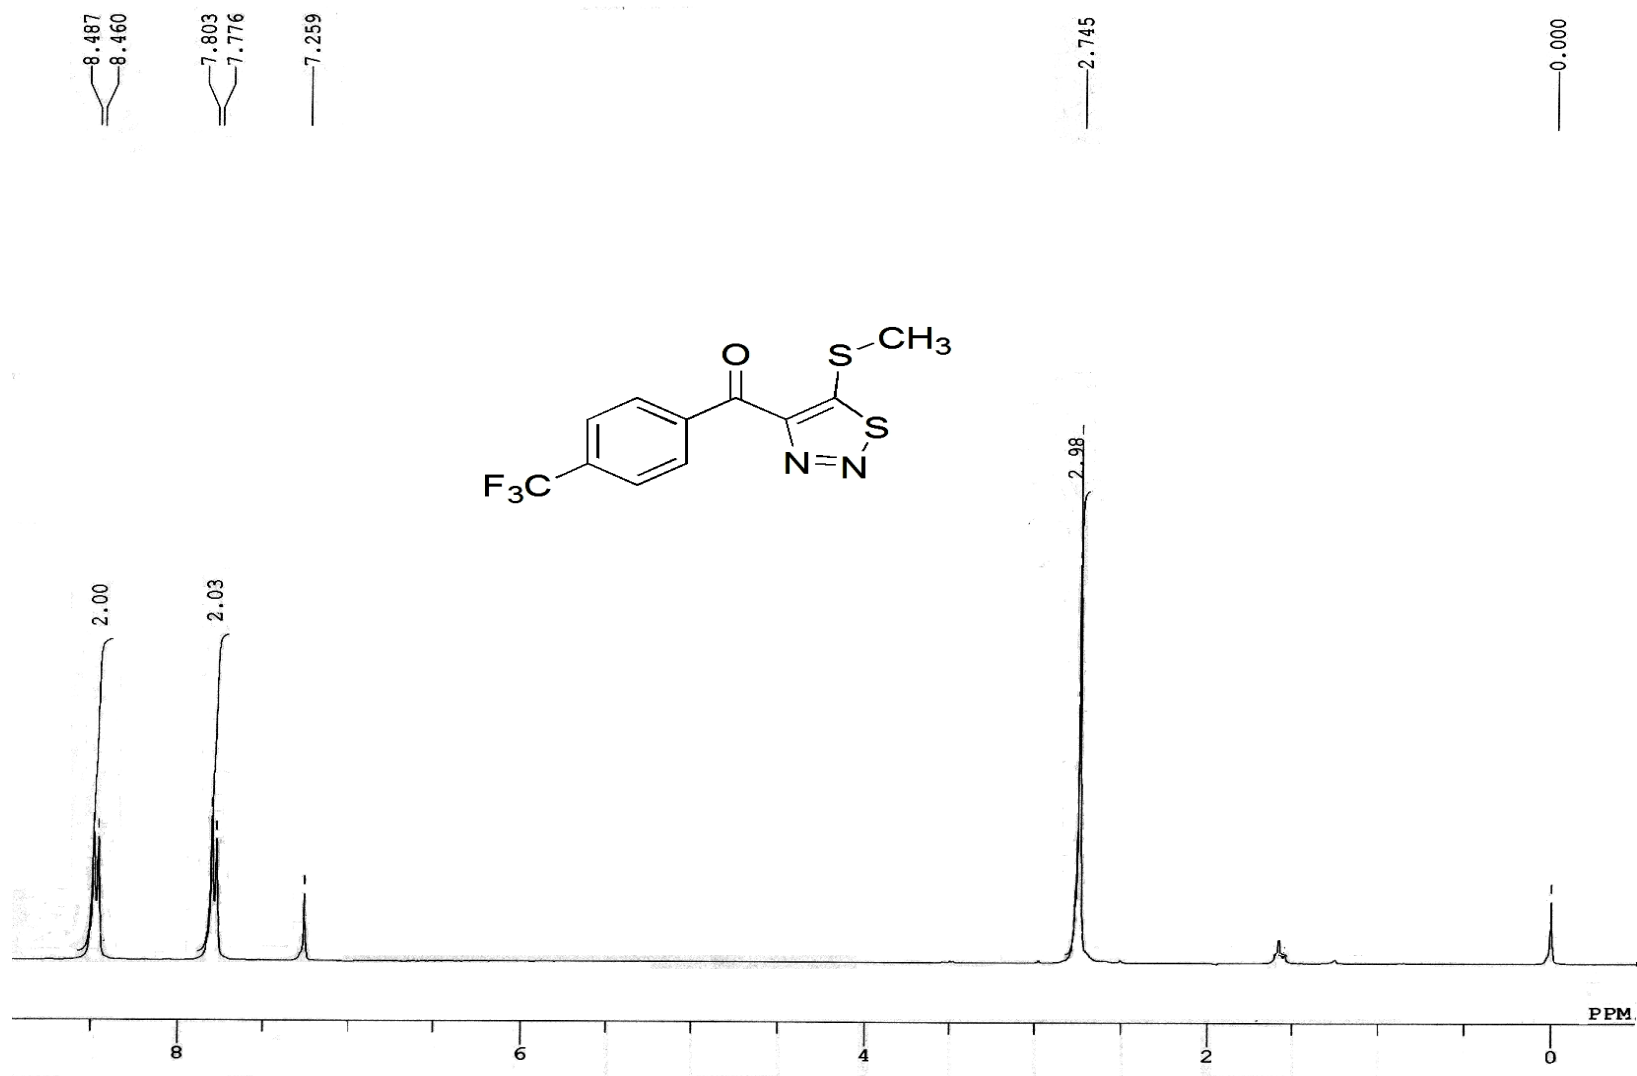

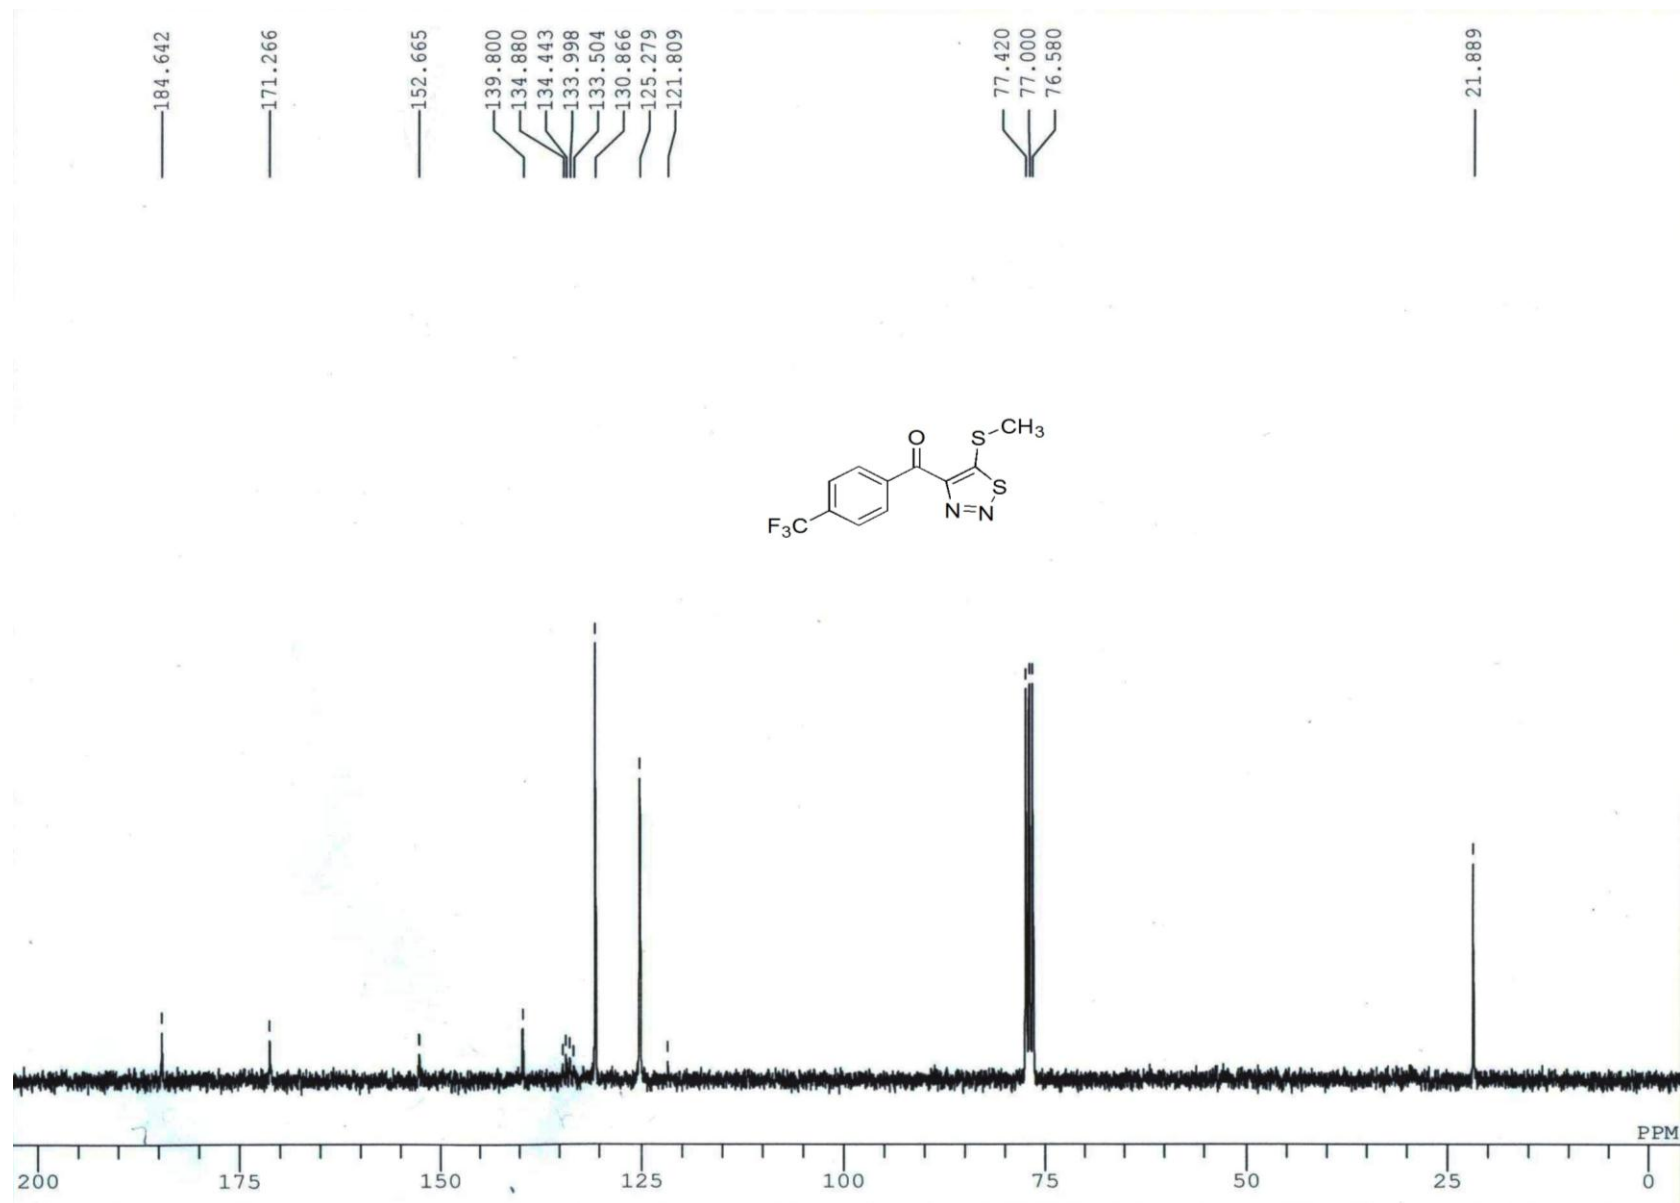

#### 4) $^1\text{H}$ & $^{13}\text{C}$ NMR Spectra of 4-(4-Methoxybenzoyl)-5-methylsulfanyl-[1,2,3]thiadiazole (3ad):

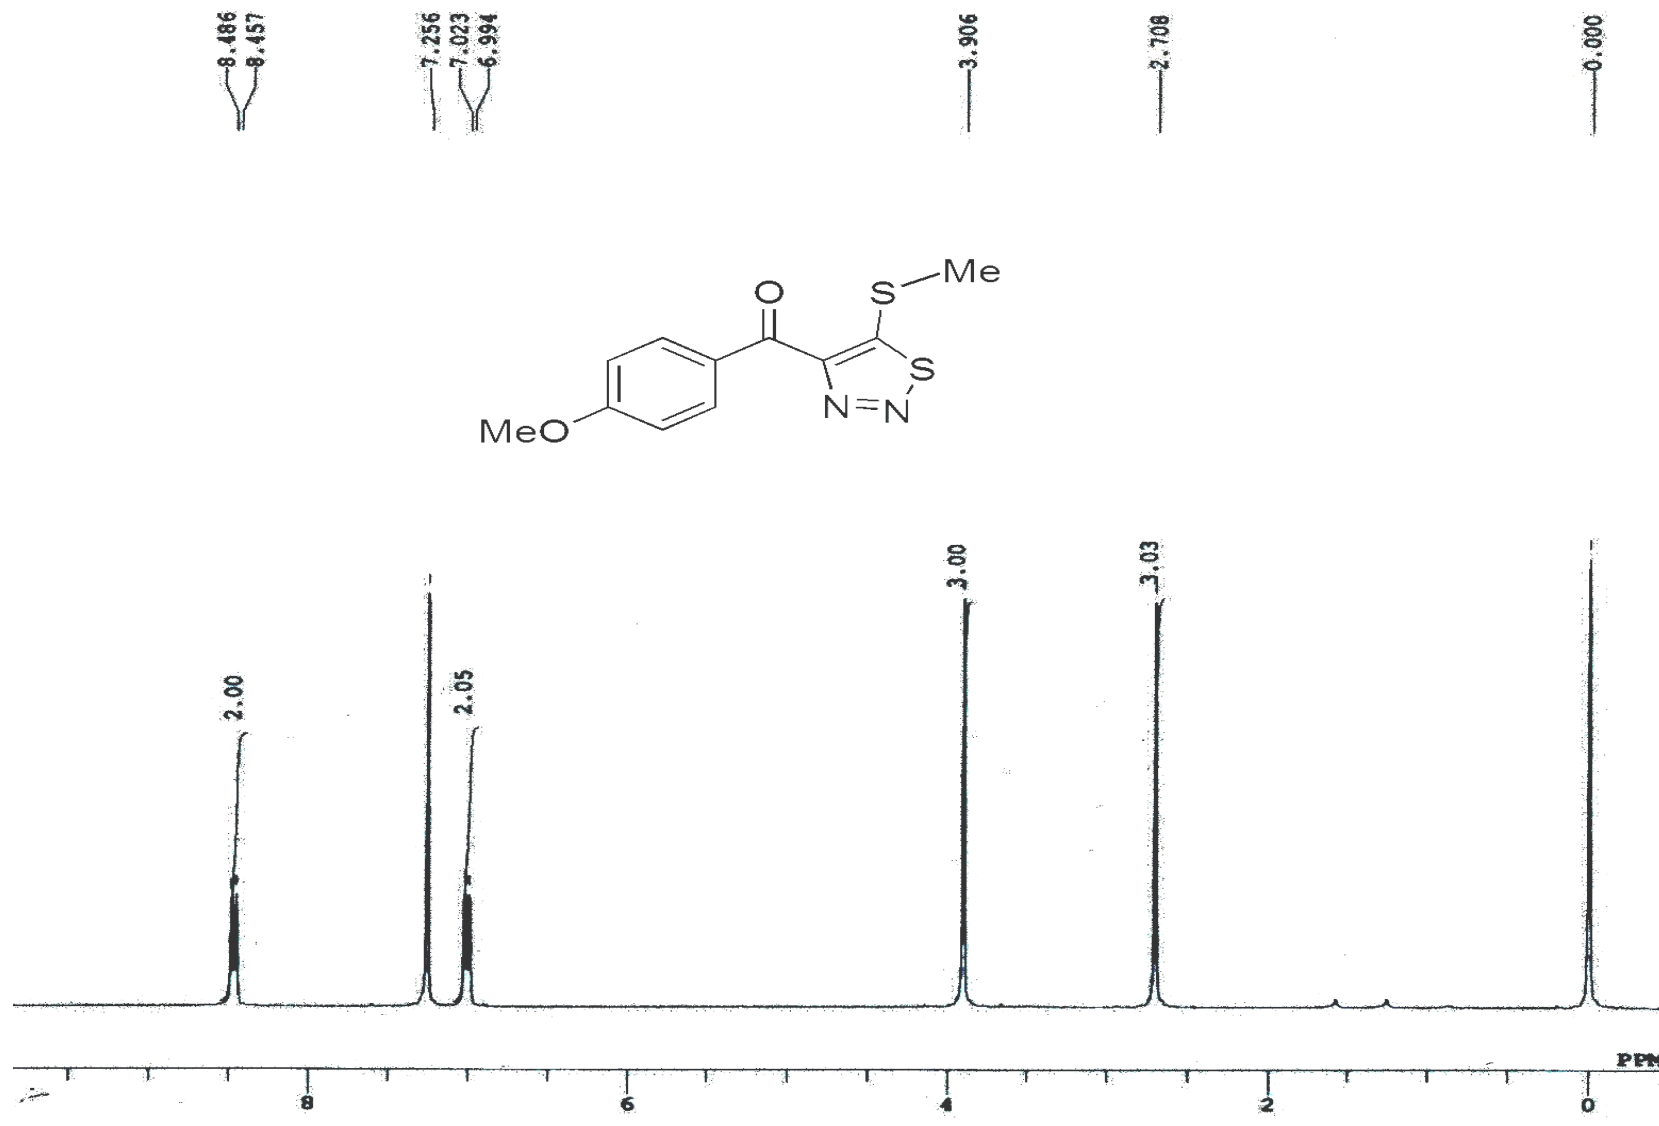



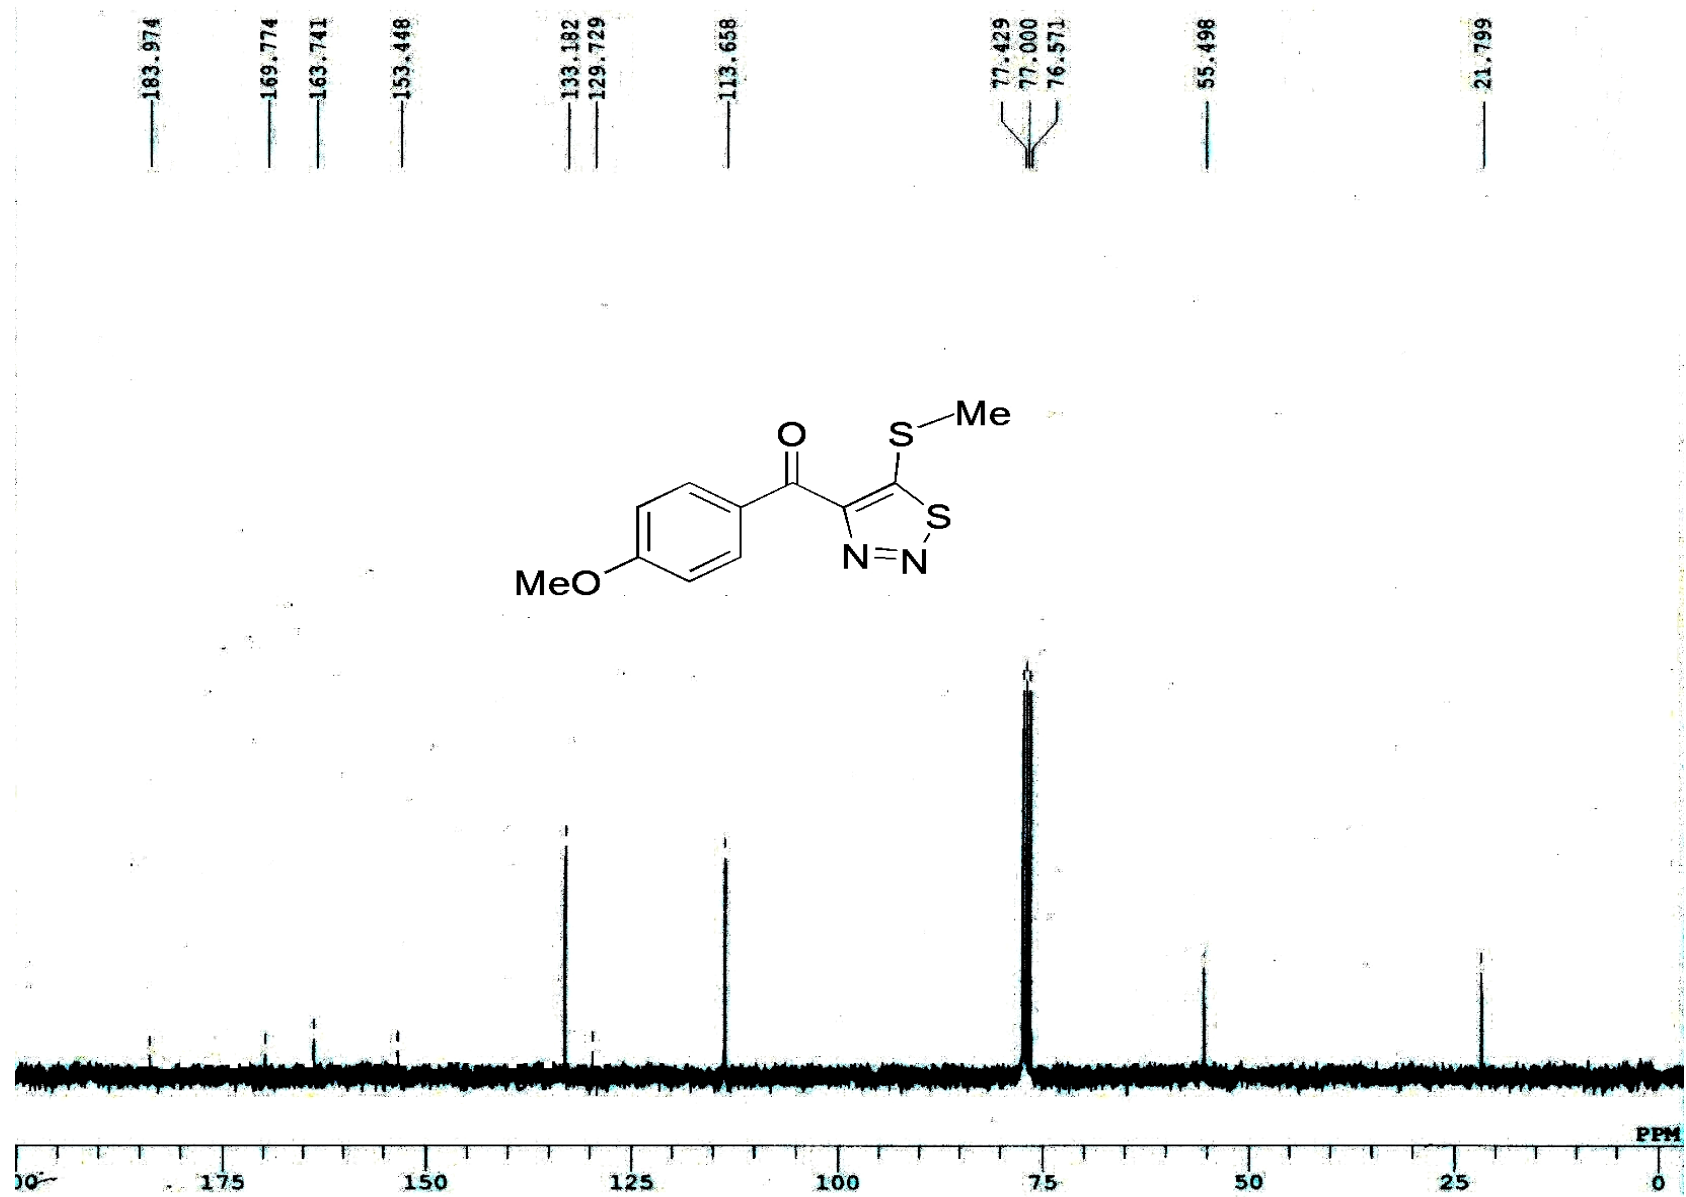

5)  $^1\text{H}$  &  $^{13}\text{C}$  NMR Spectra of 4-(2-furoyl)-5-methylsulfanyl-1,2,3-thiadiazole (3ae):

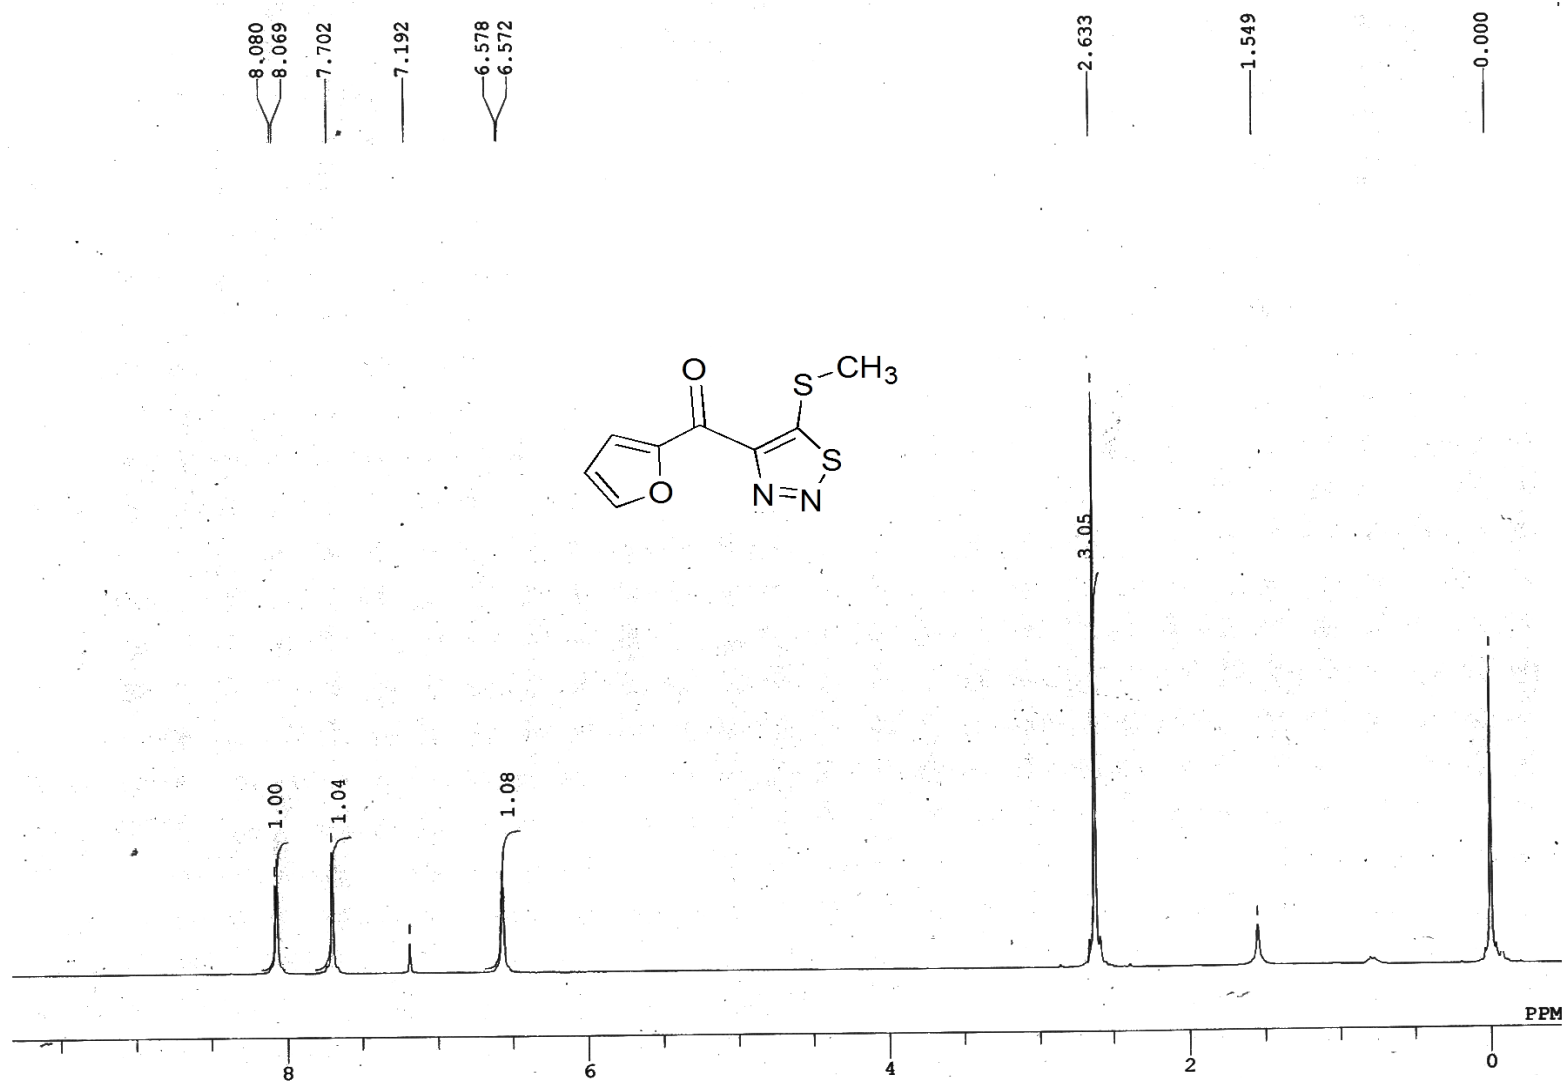

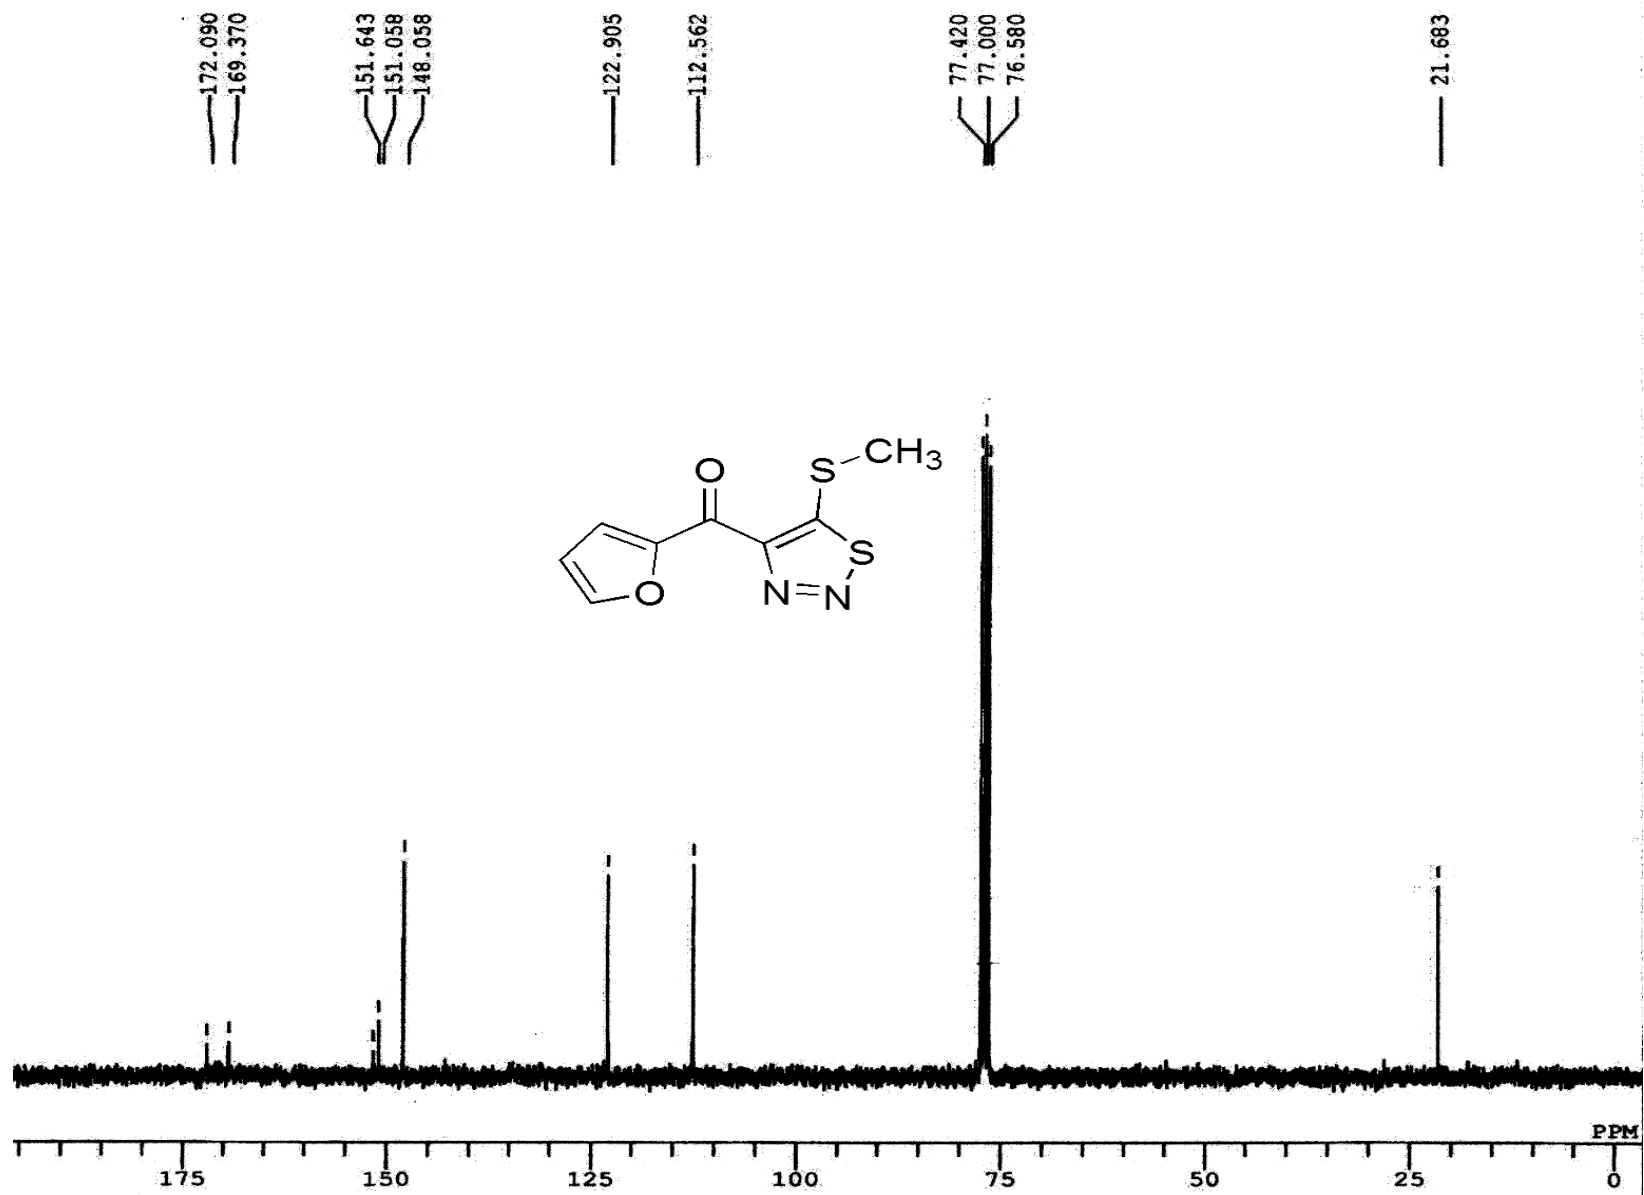

6)  $^1\text{H}$  &  $^{13}\text{C}$  NMR Spectra of 5-Methylsulfanyl-4-(2-thienoyl)-1,2,3-thiadiazole (3af):

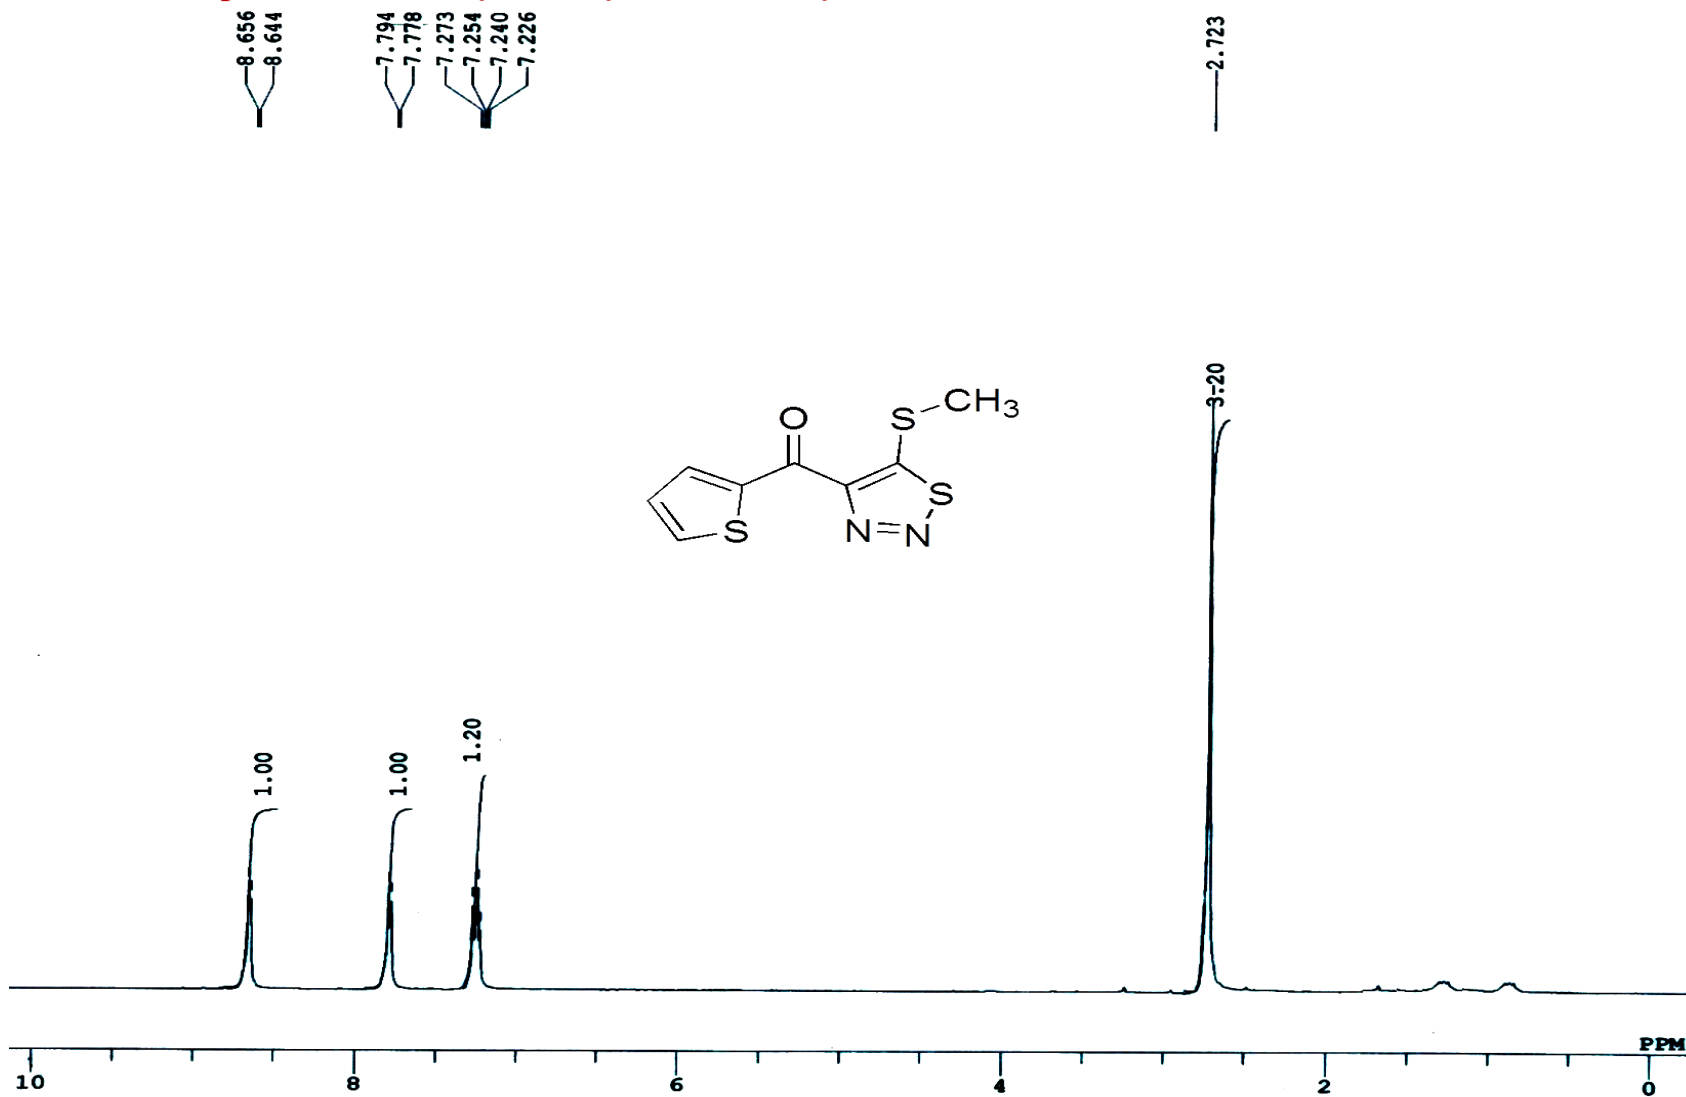

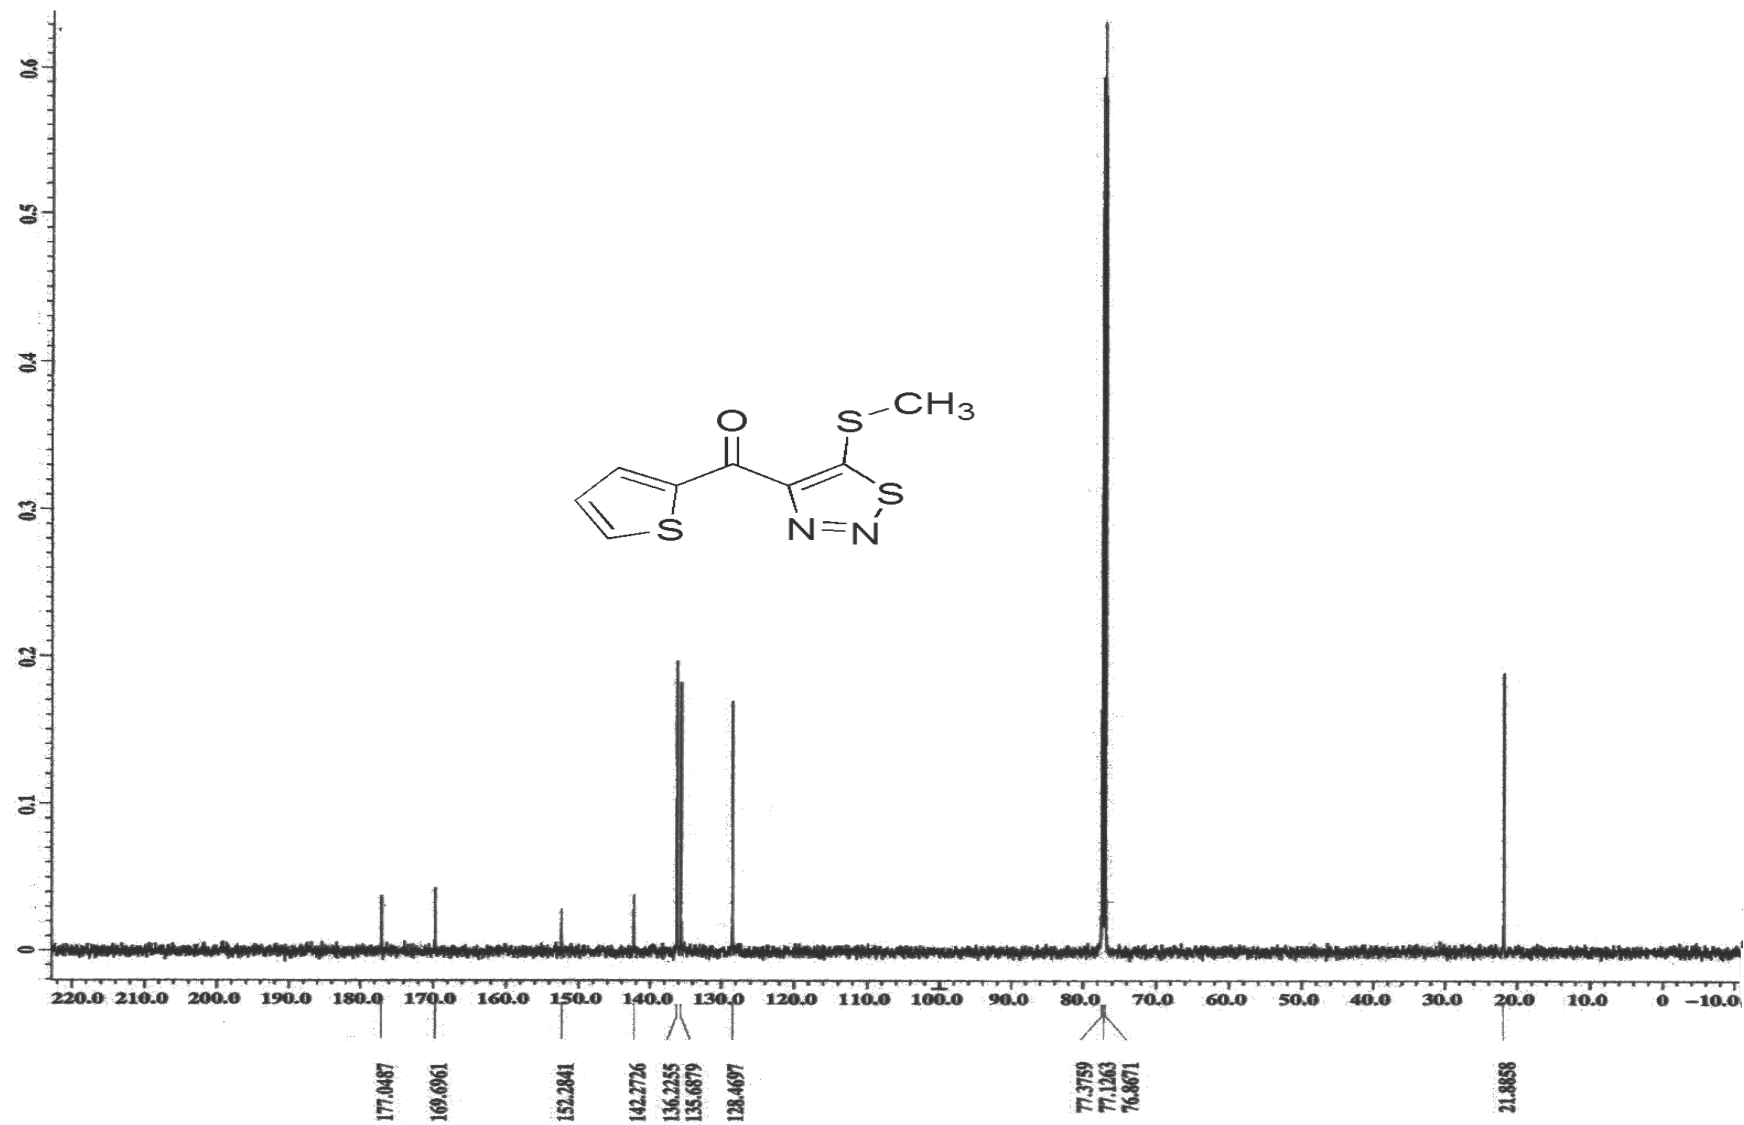

7)  $^1\text{H}$  &  $^{13}\text{C}$  NMR Spectra of 5-Methylsulfanyl-4-(1-naphthoyl)-1,2,3-thiadiazole (3ag):

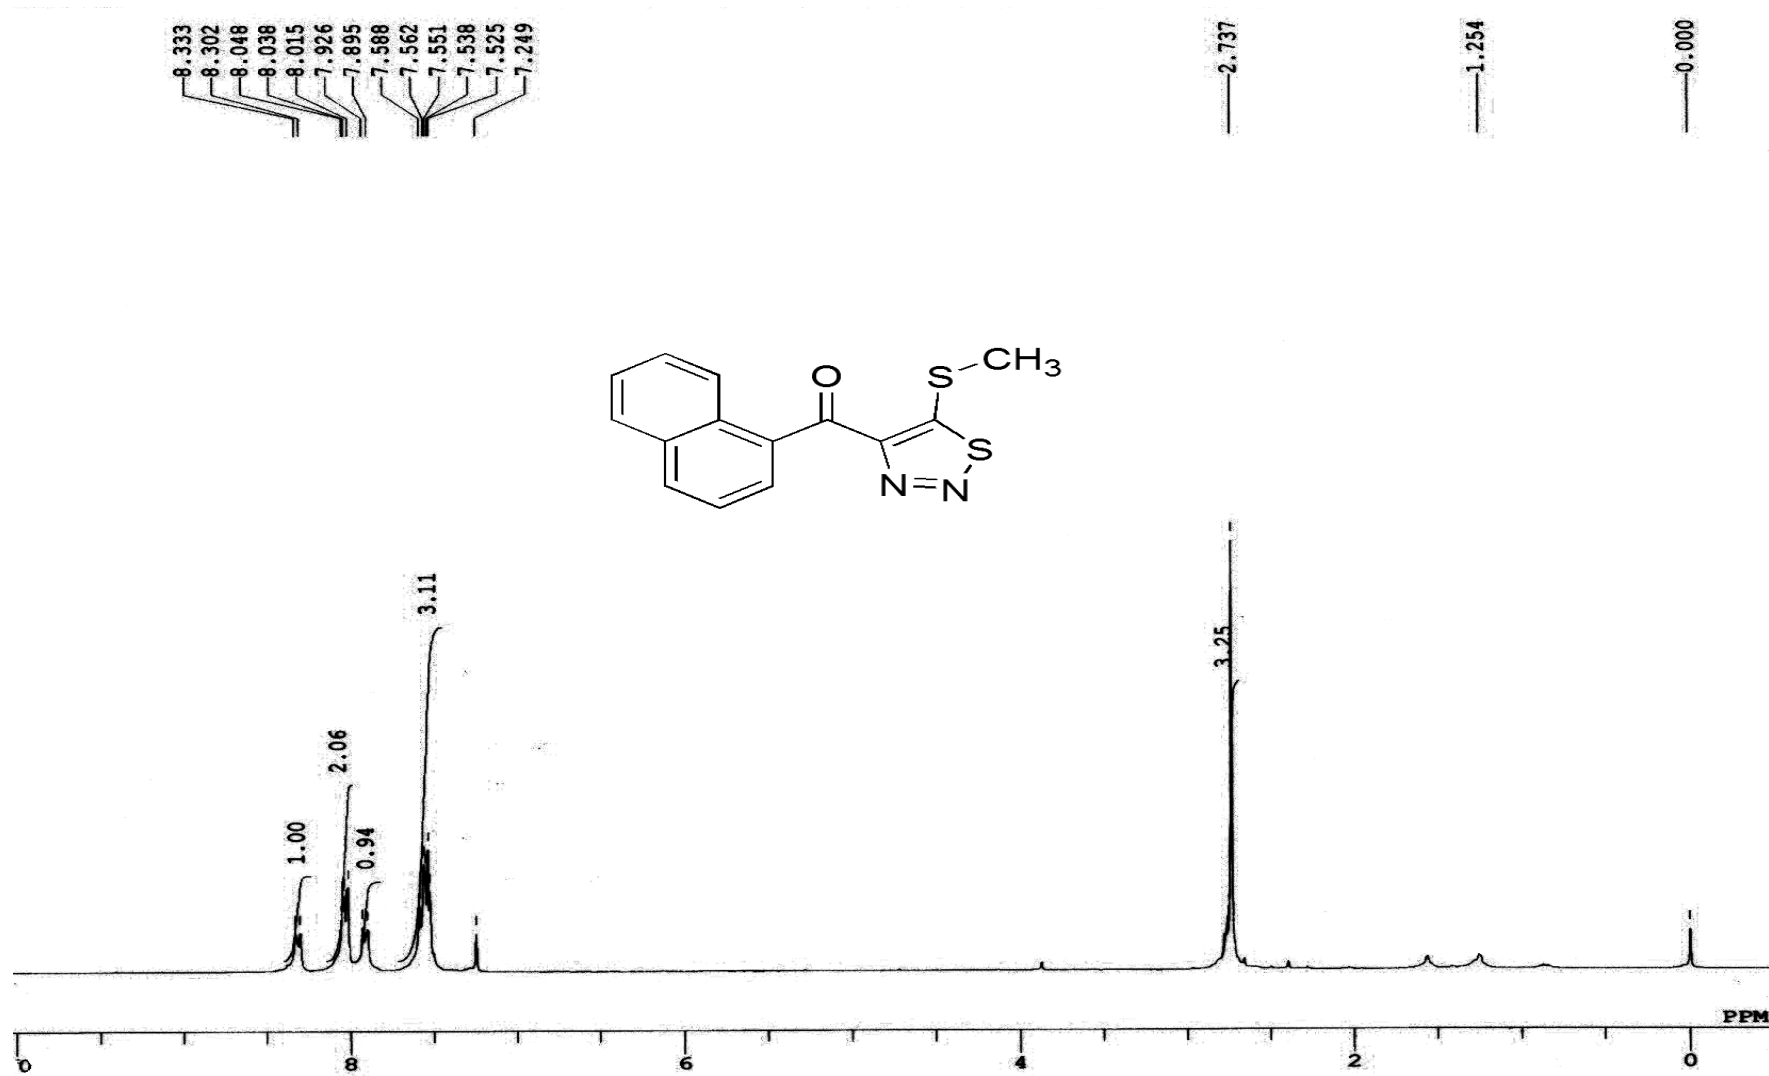

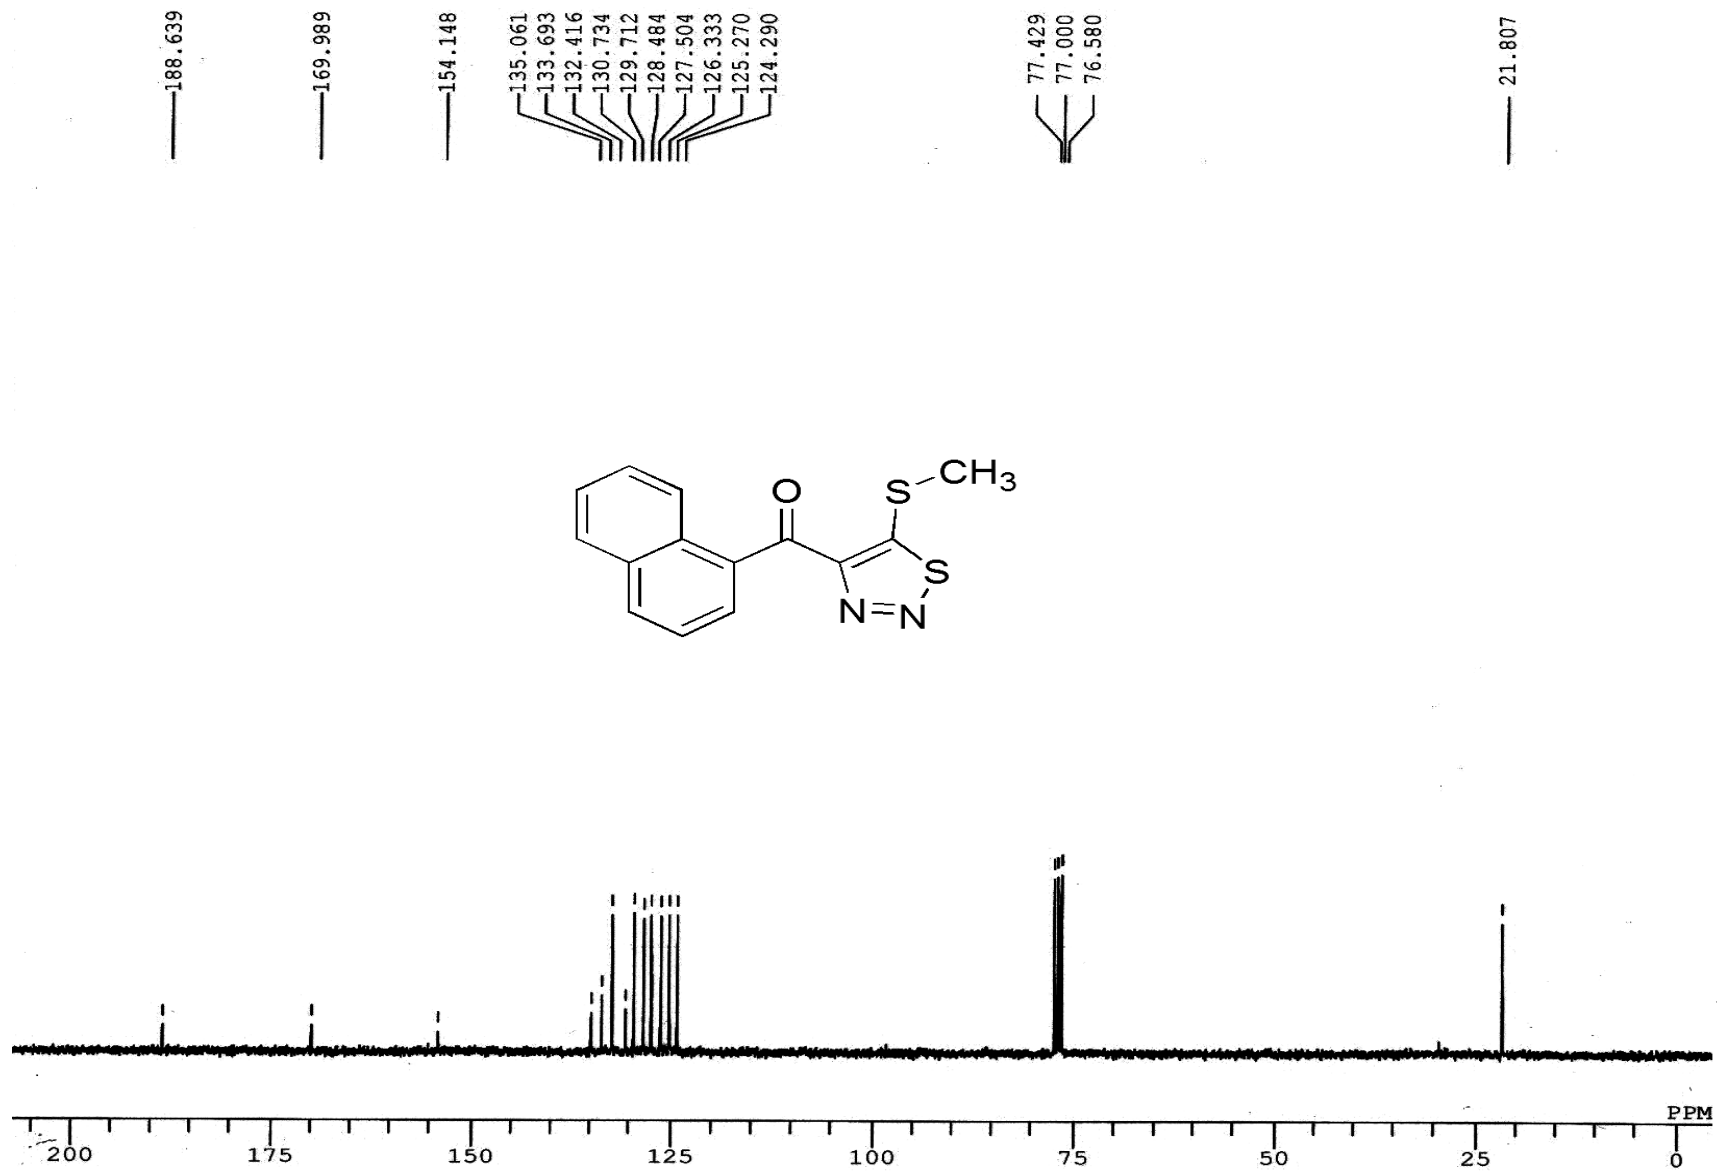

8)  $^1\text{H}$  &  $^{13}\text{C}$  NMR Spectra of 5-Methylsulfanyl-4-(3-pyridoyl)-1,2,3-thiadiazole (3ah):

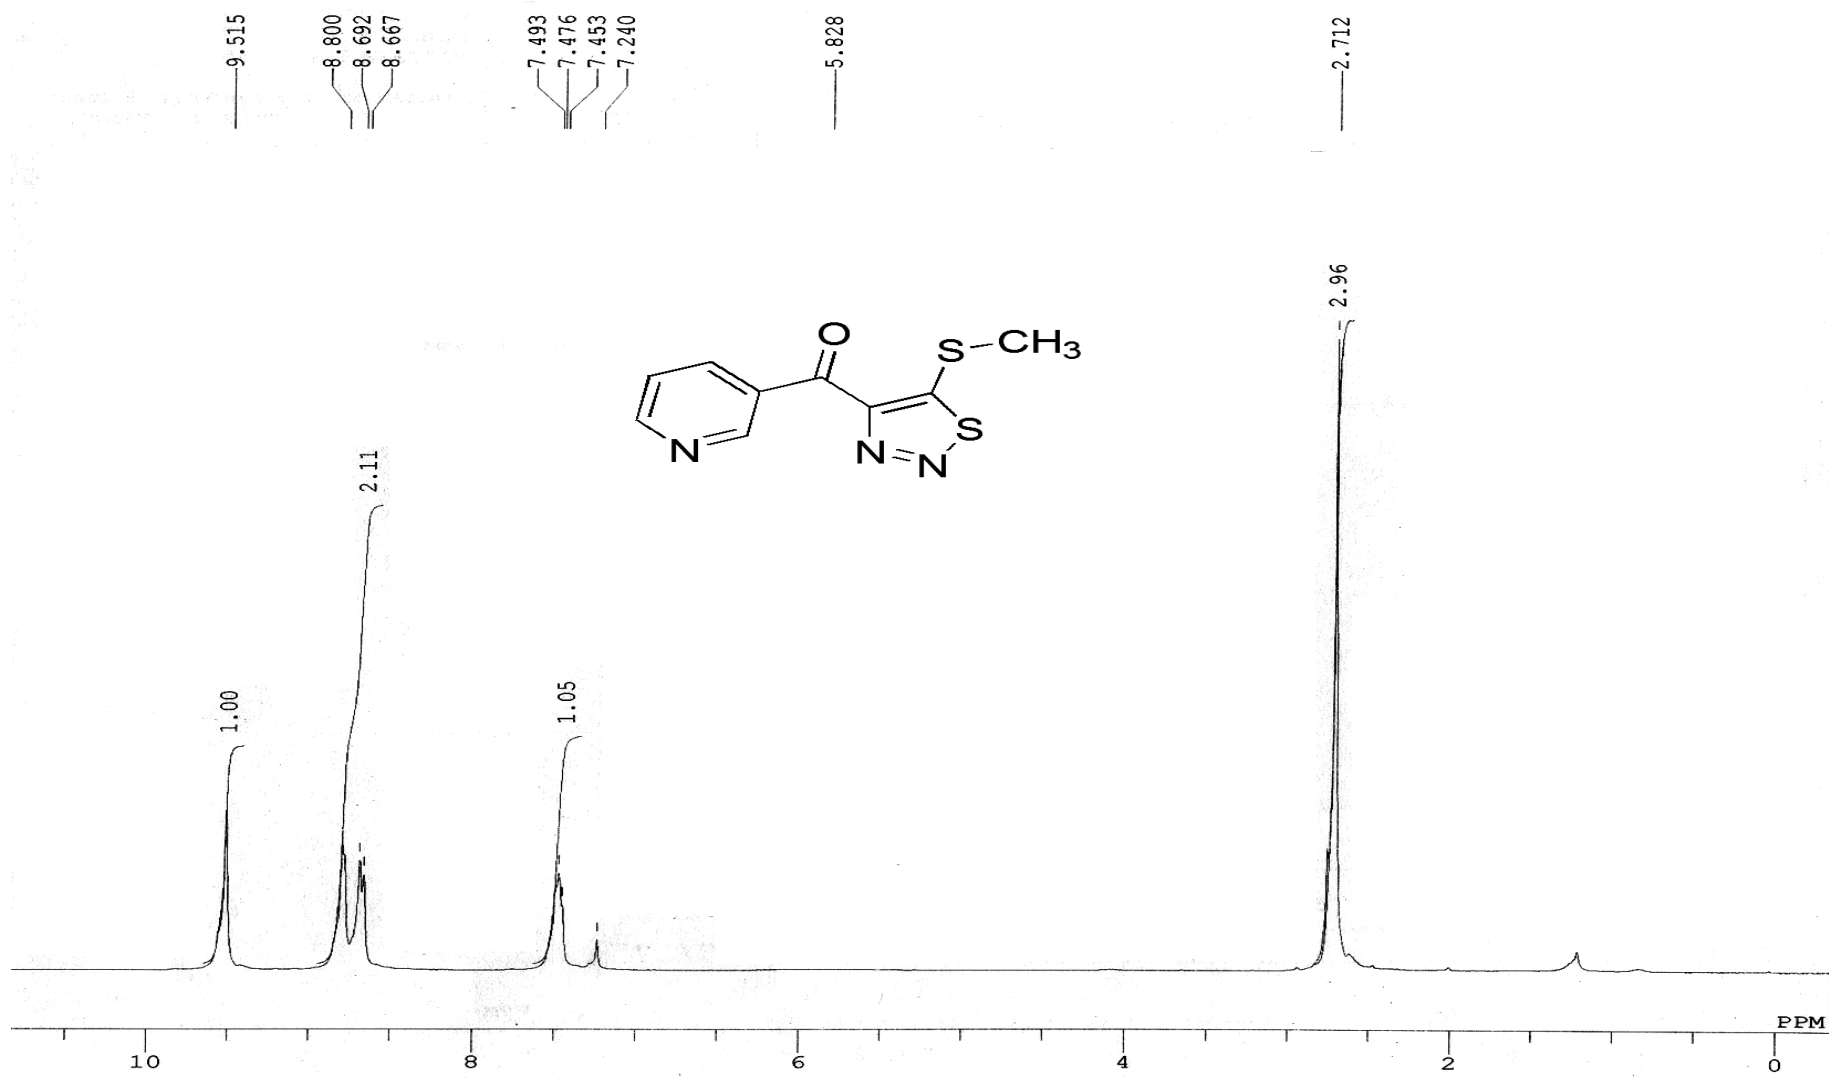



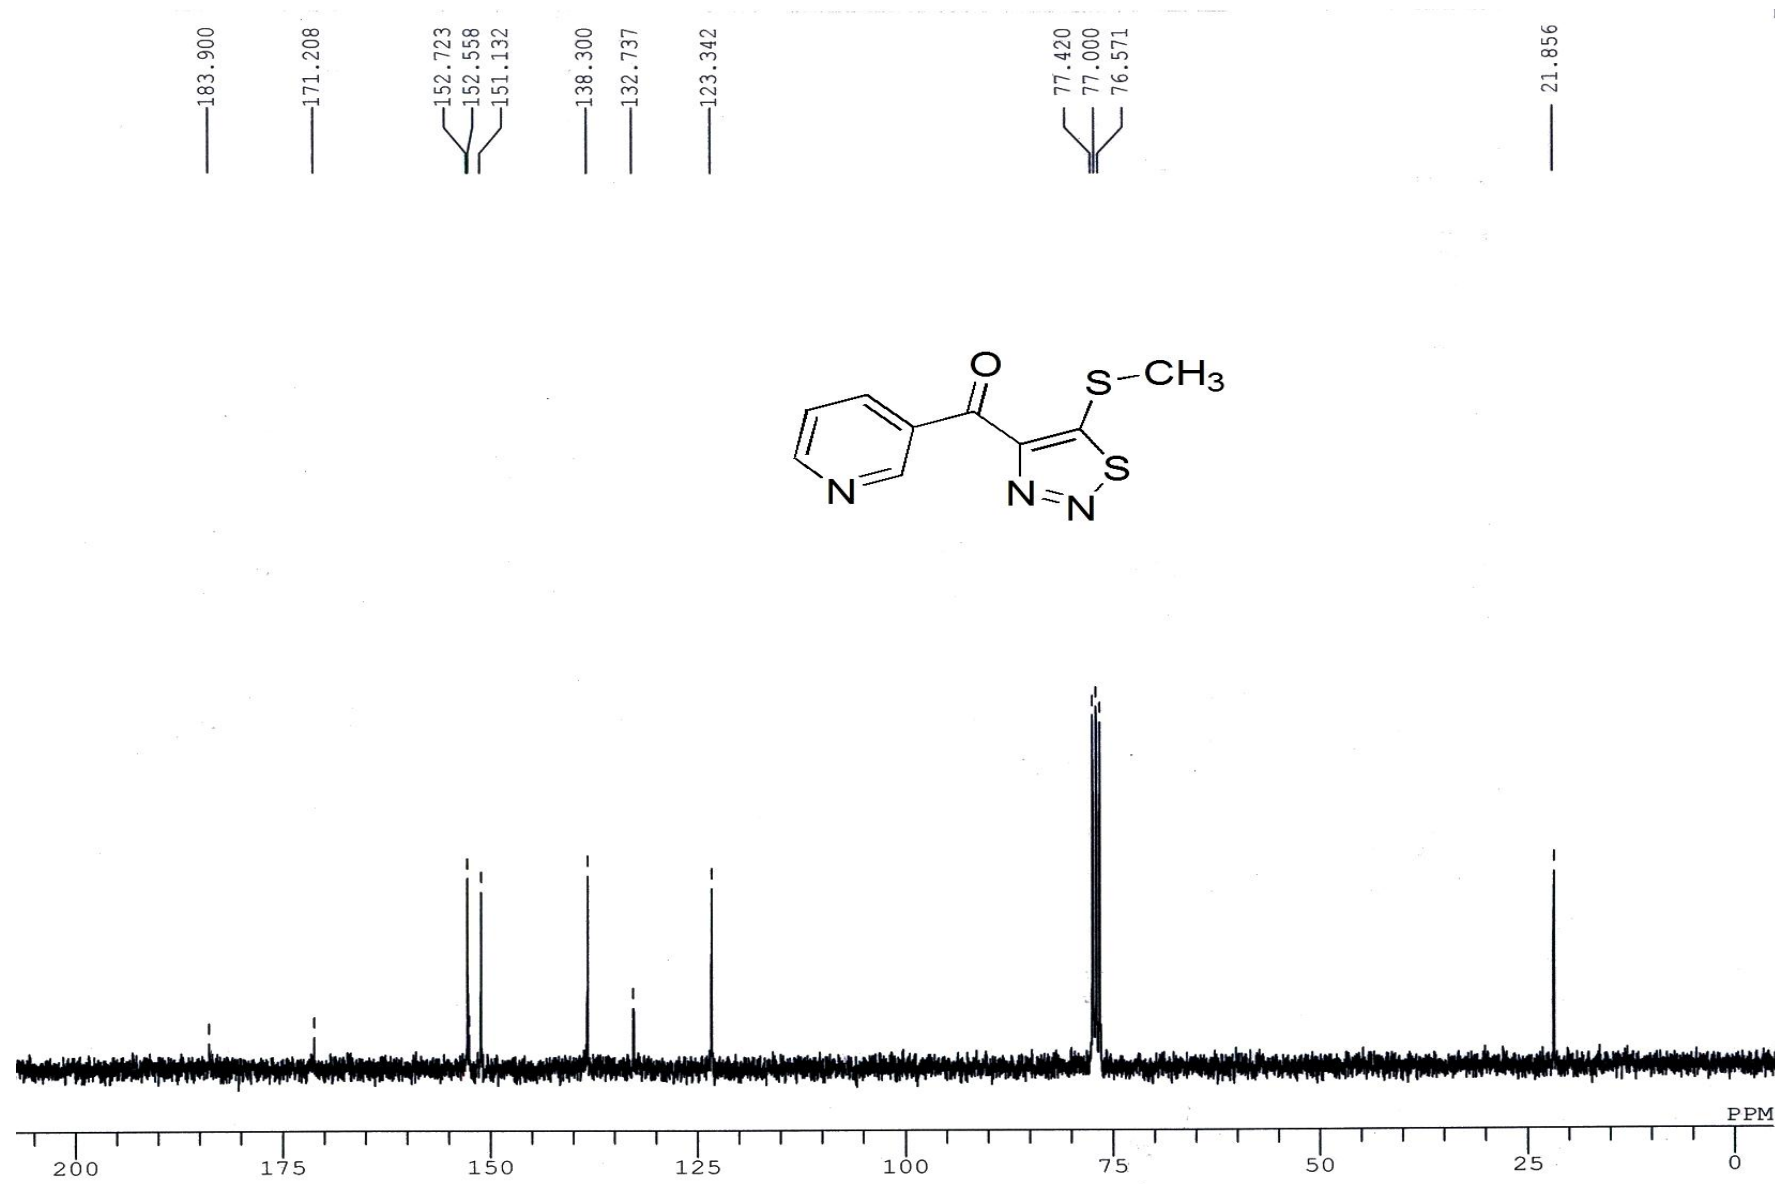

9)  $^1\text{H}$  &  $^{13}\text{C}$  NMR Spectra of 4-(2-Chlorobenzoyl)-5-methylsulfanyl-1,2,3-thiadiazole (3ai):

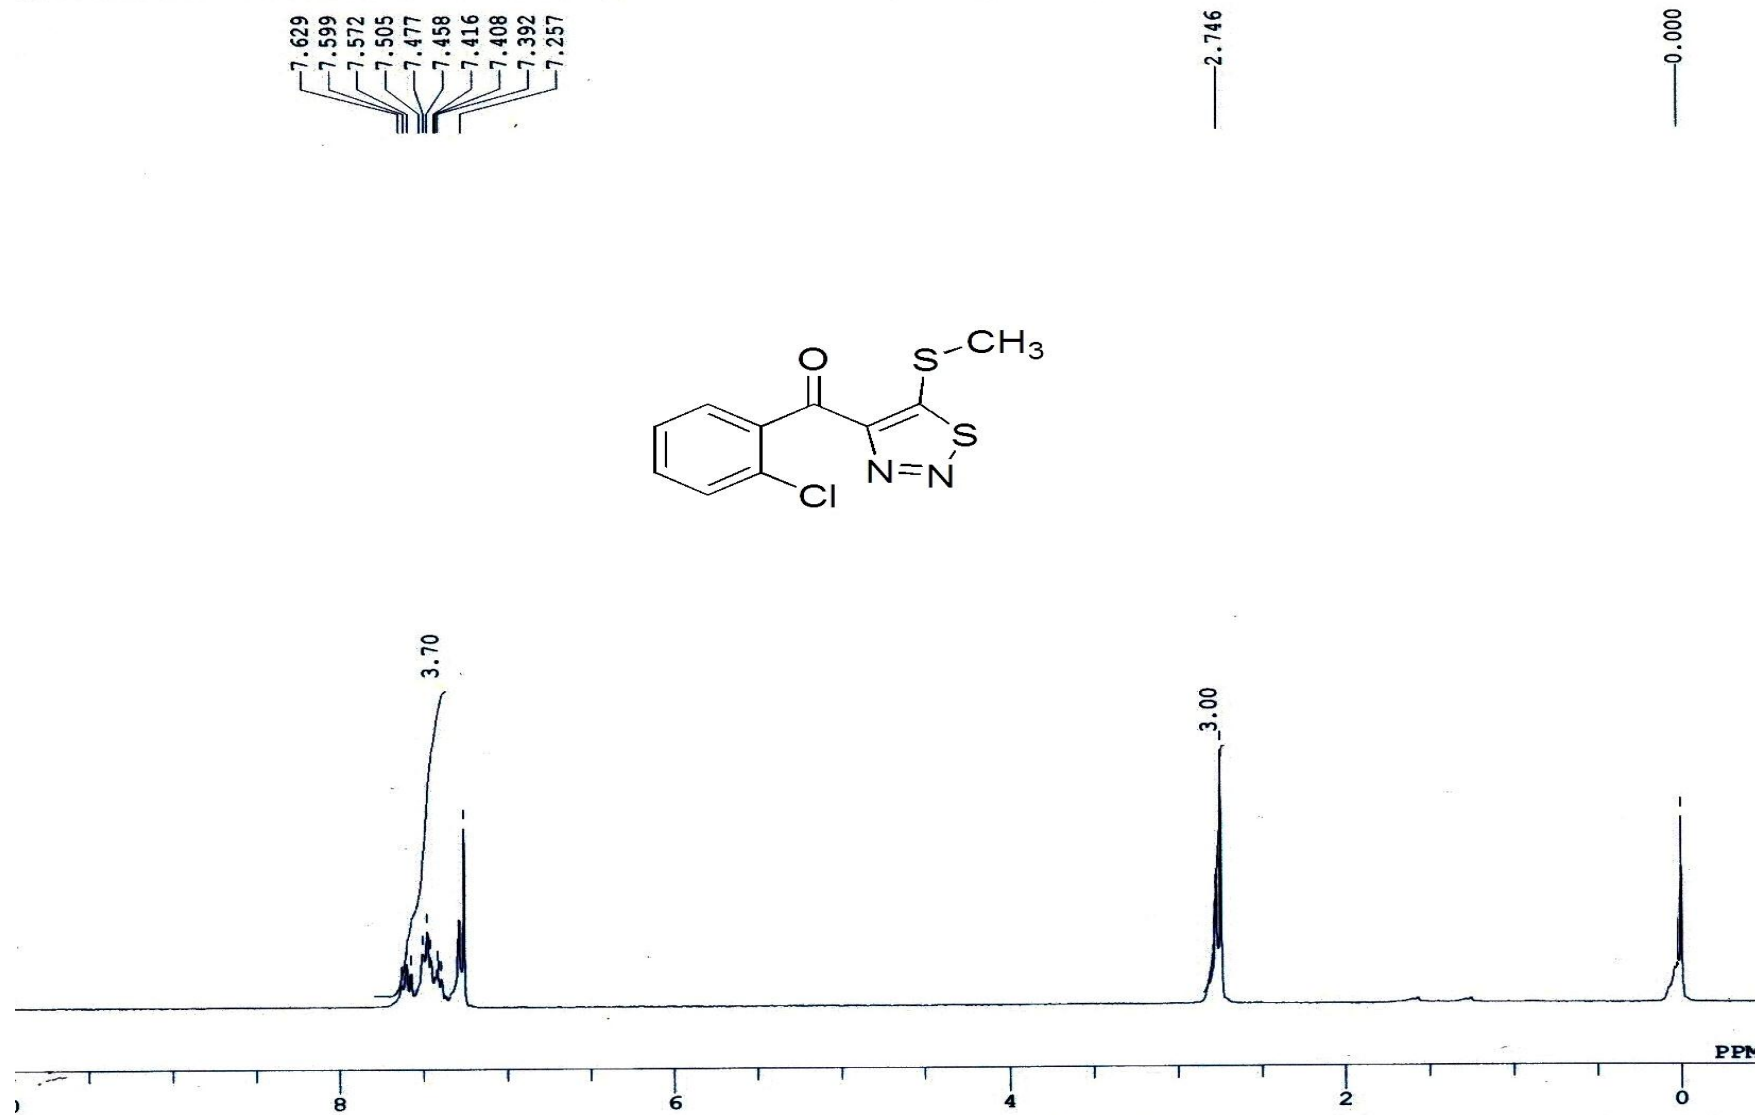

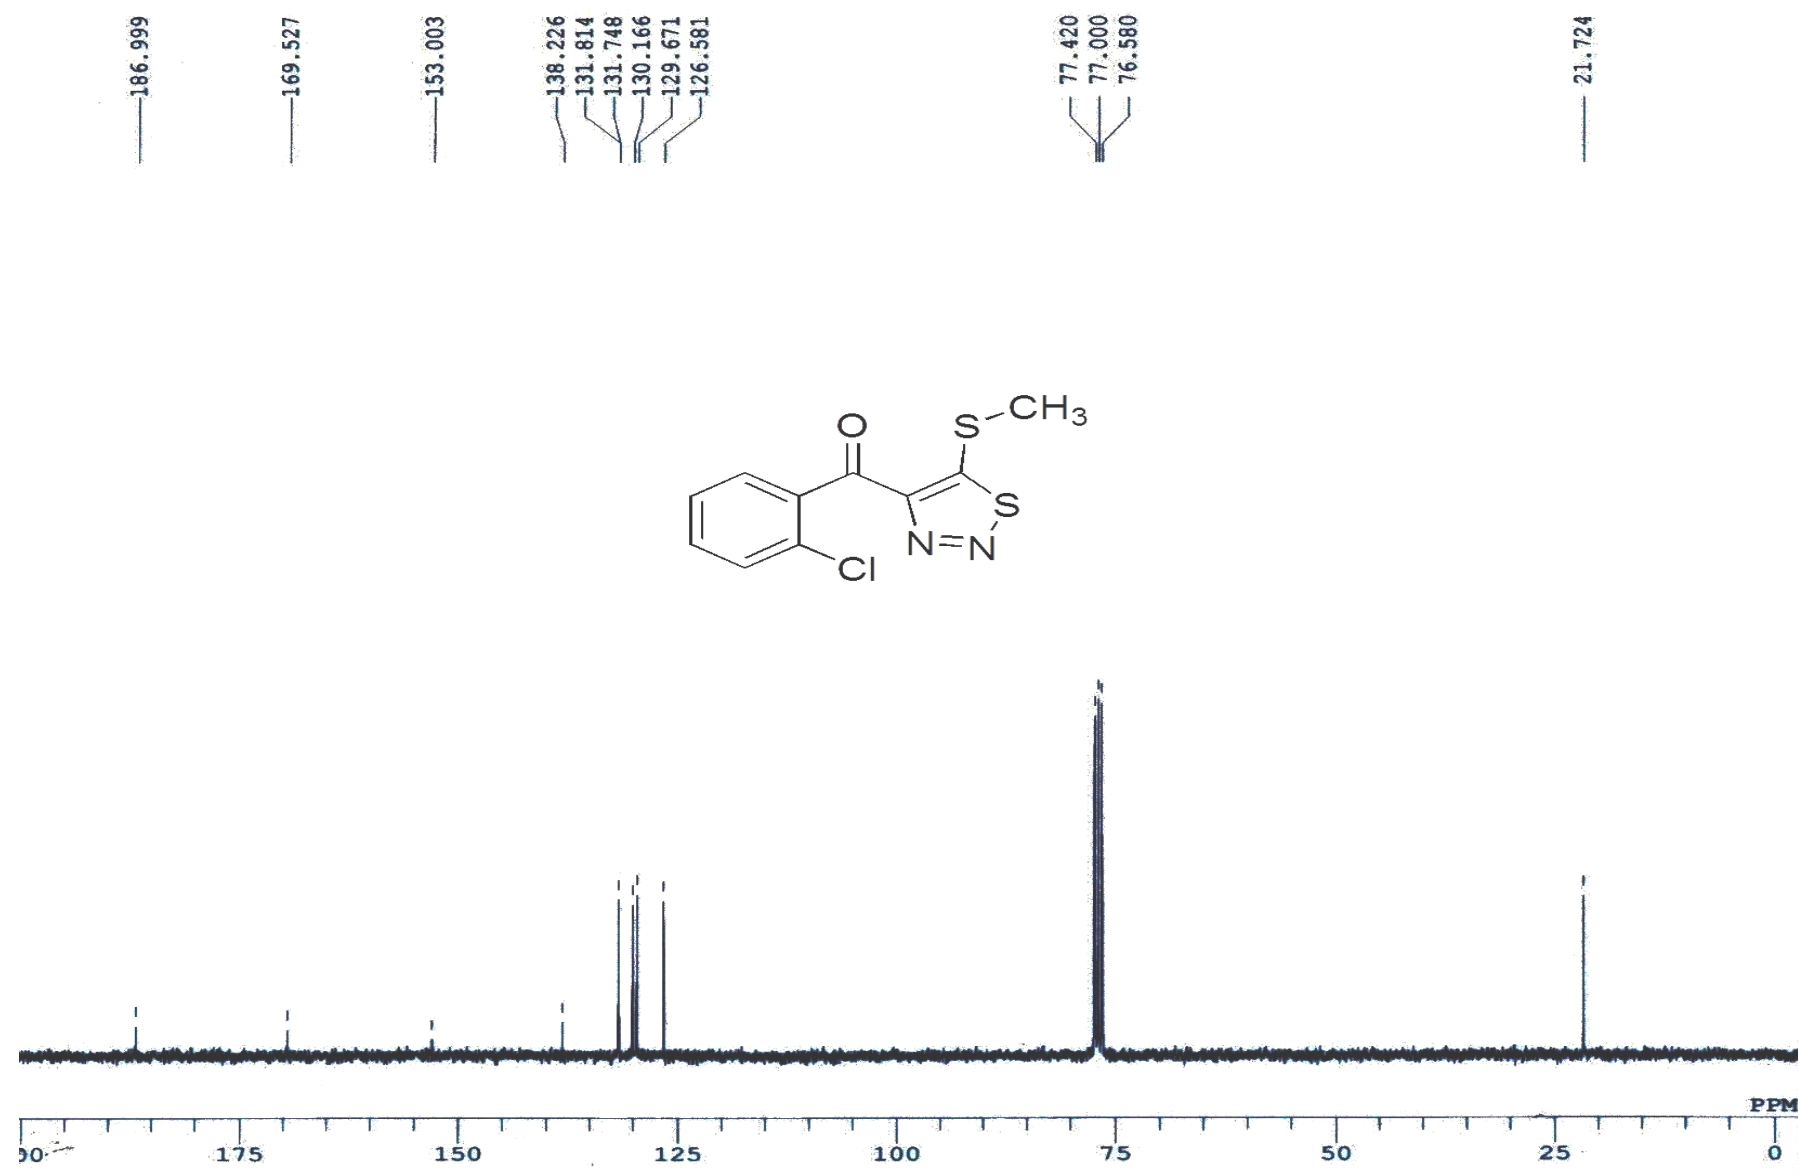

### 10) $^1\text{H}$ & $^{13}\text{C}$ NMR Spectra of 4-(3,4-Methylenedioxybenzoyl)-5-methylsulfanyl-1,2,3-thiadiazole (3aj):

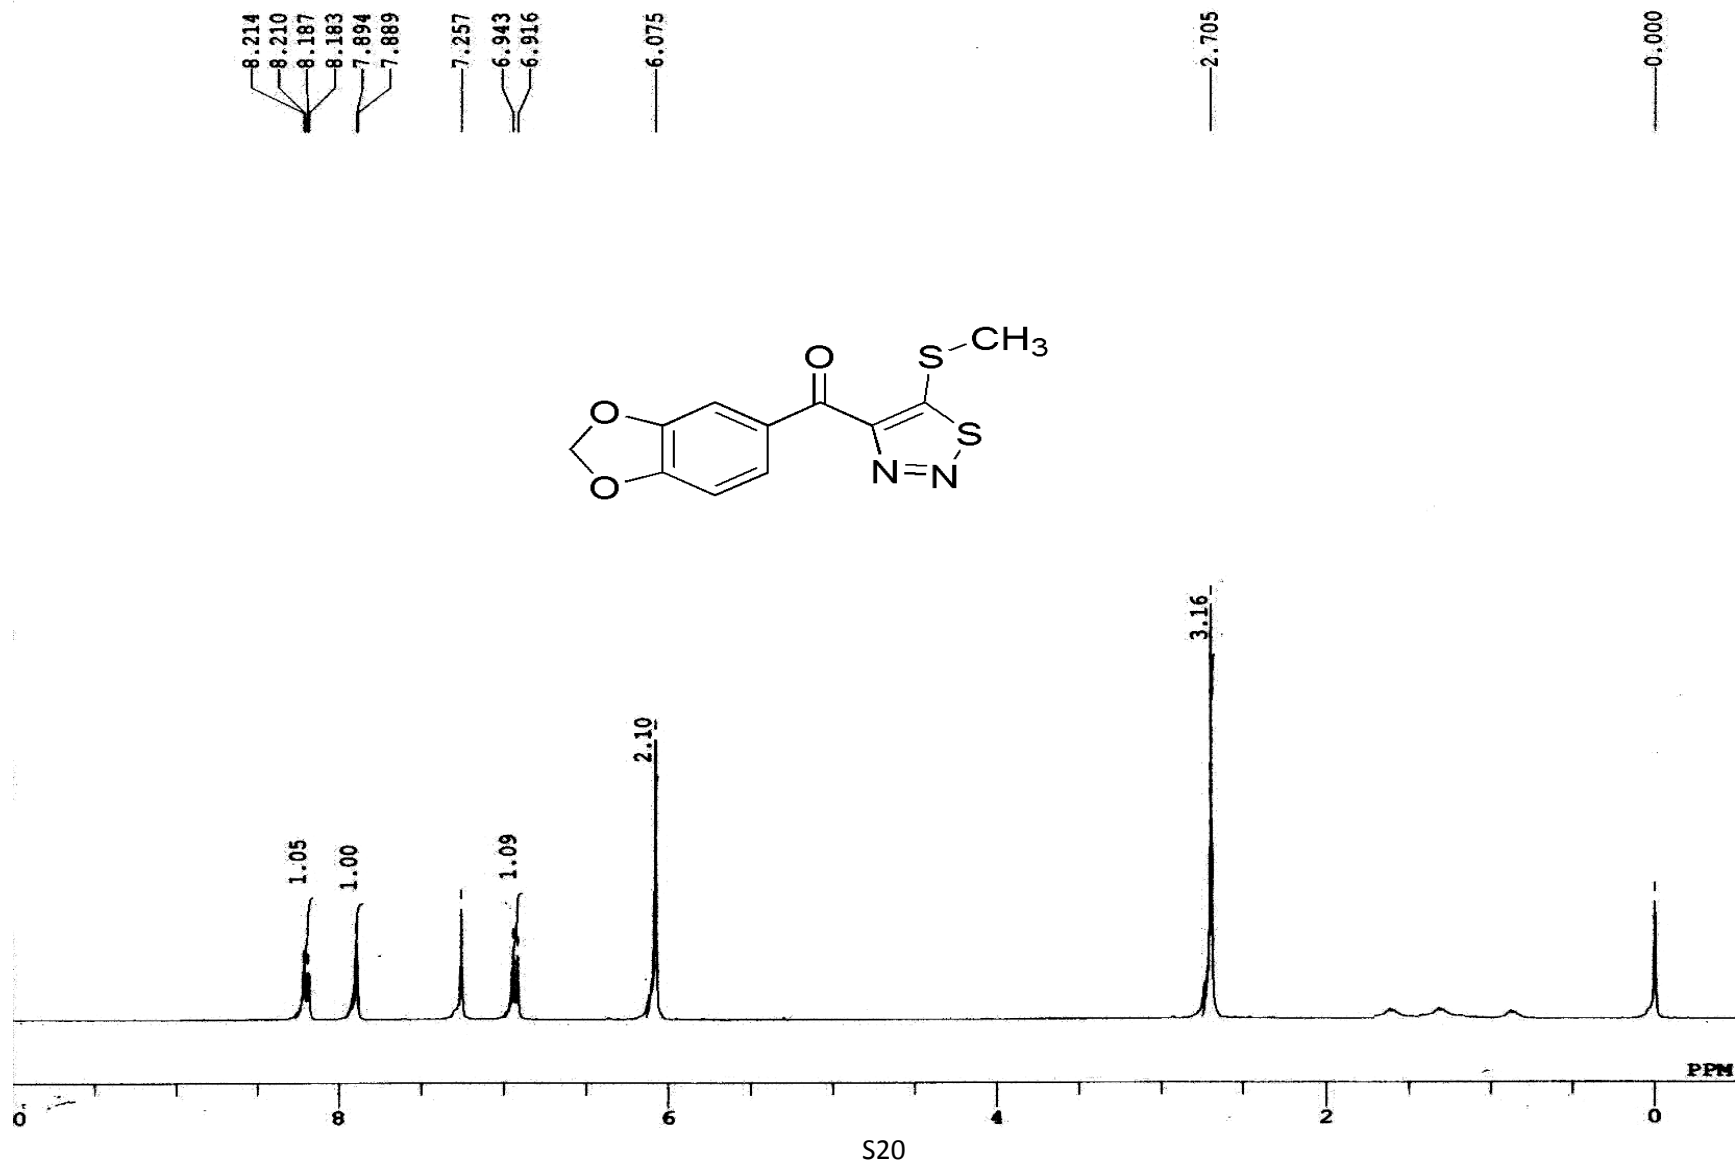

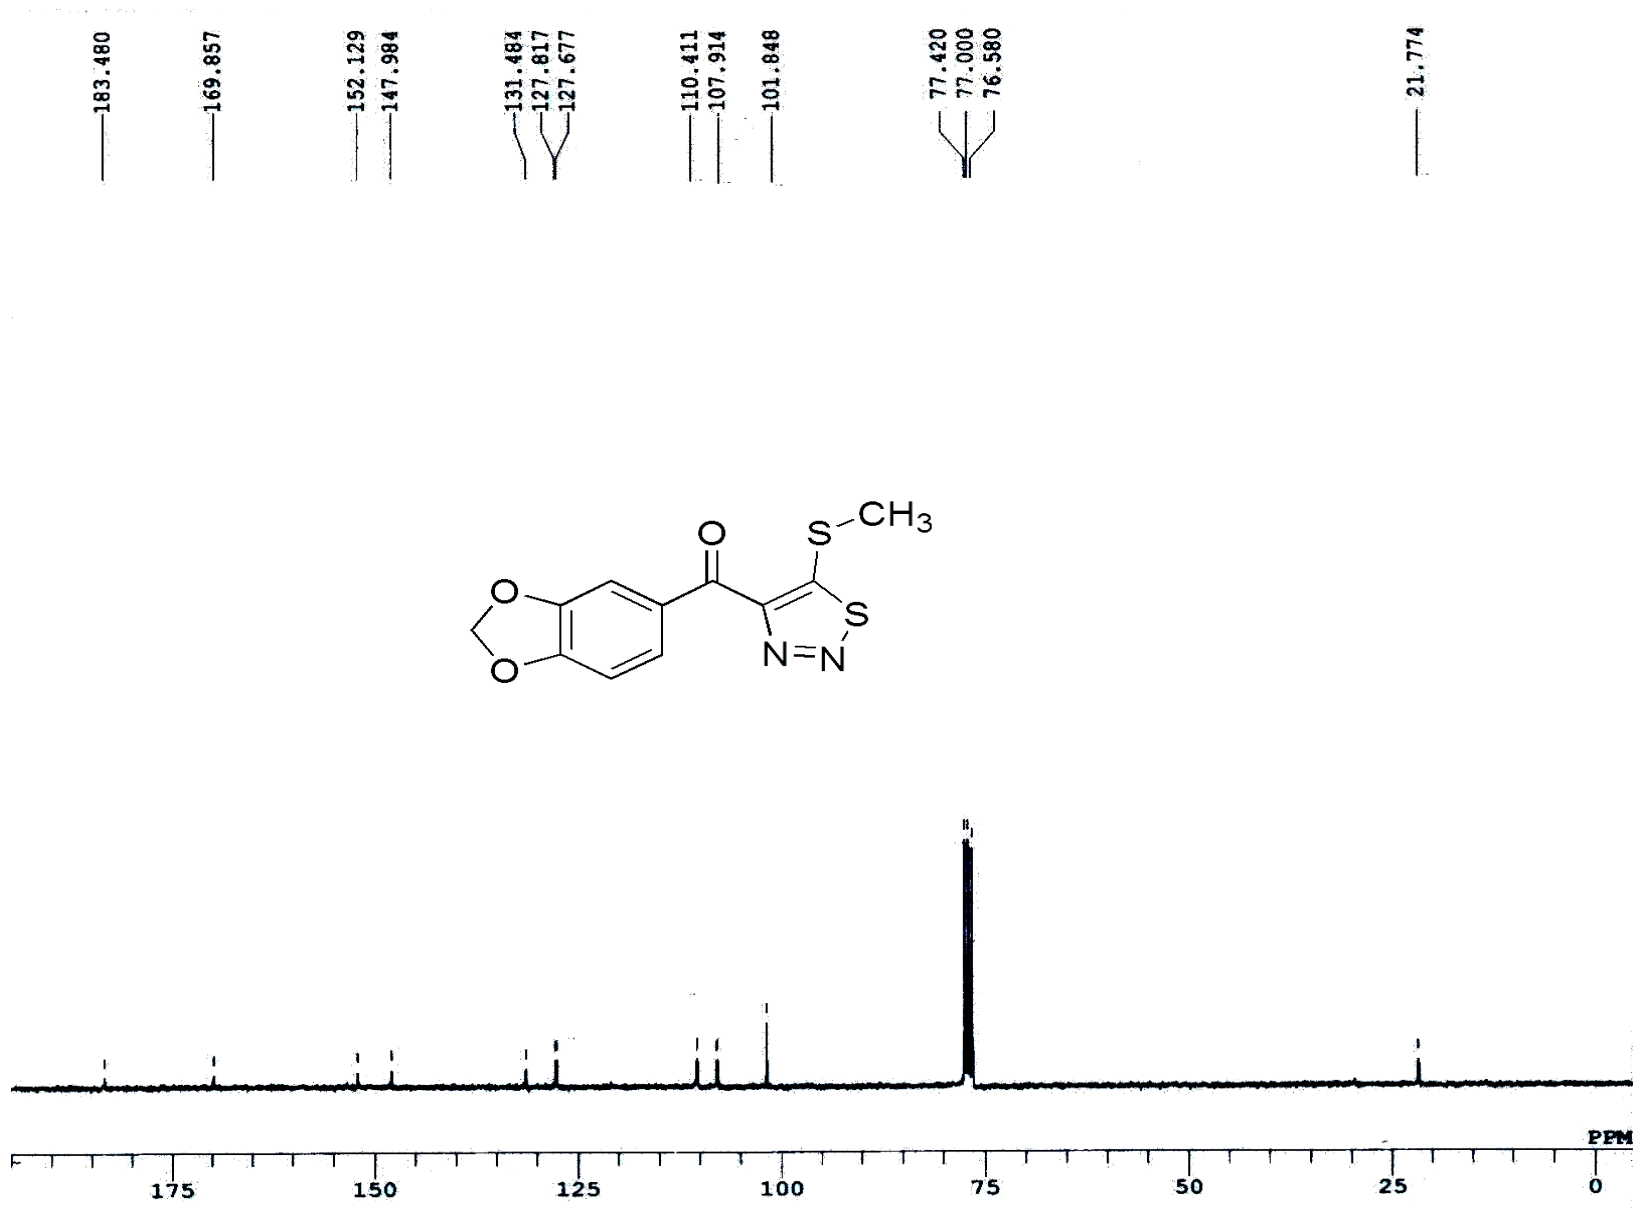

### 11) $^1\text{H}$ & $^{13}\text{C}$ NMR Spectra of 4-(N-Methylpyrrol-3-oyl)-5-methylsulfanyl-1,2,3-thiadiazole (3ak):

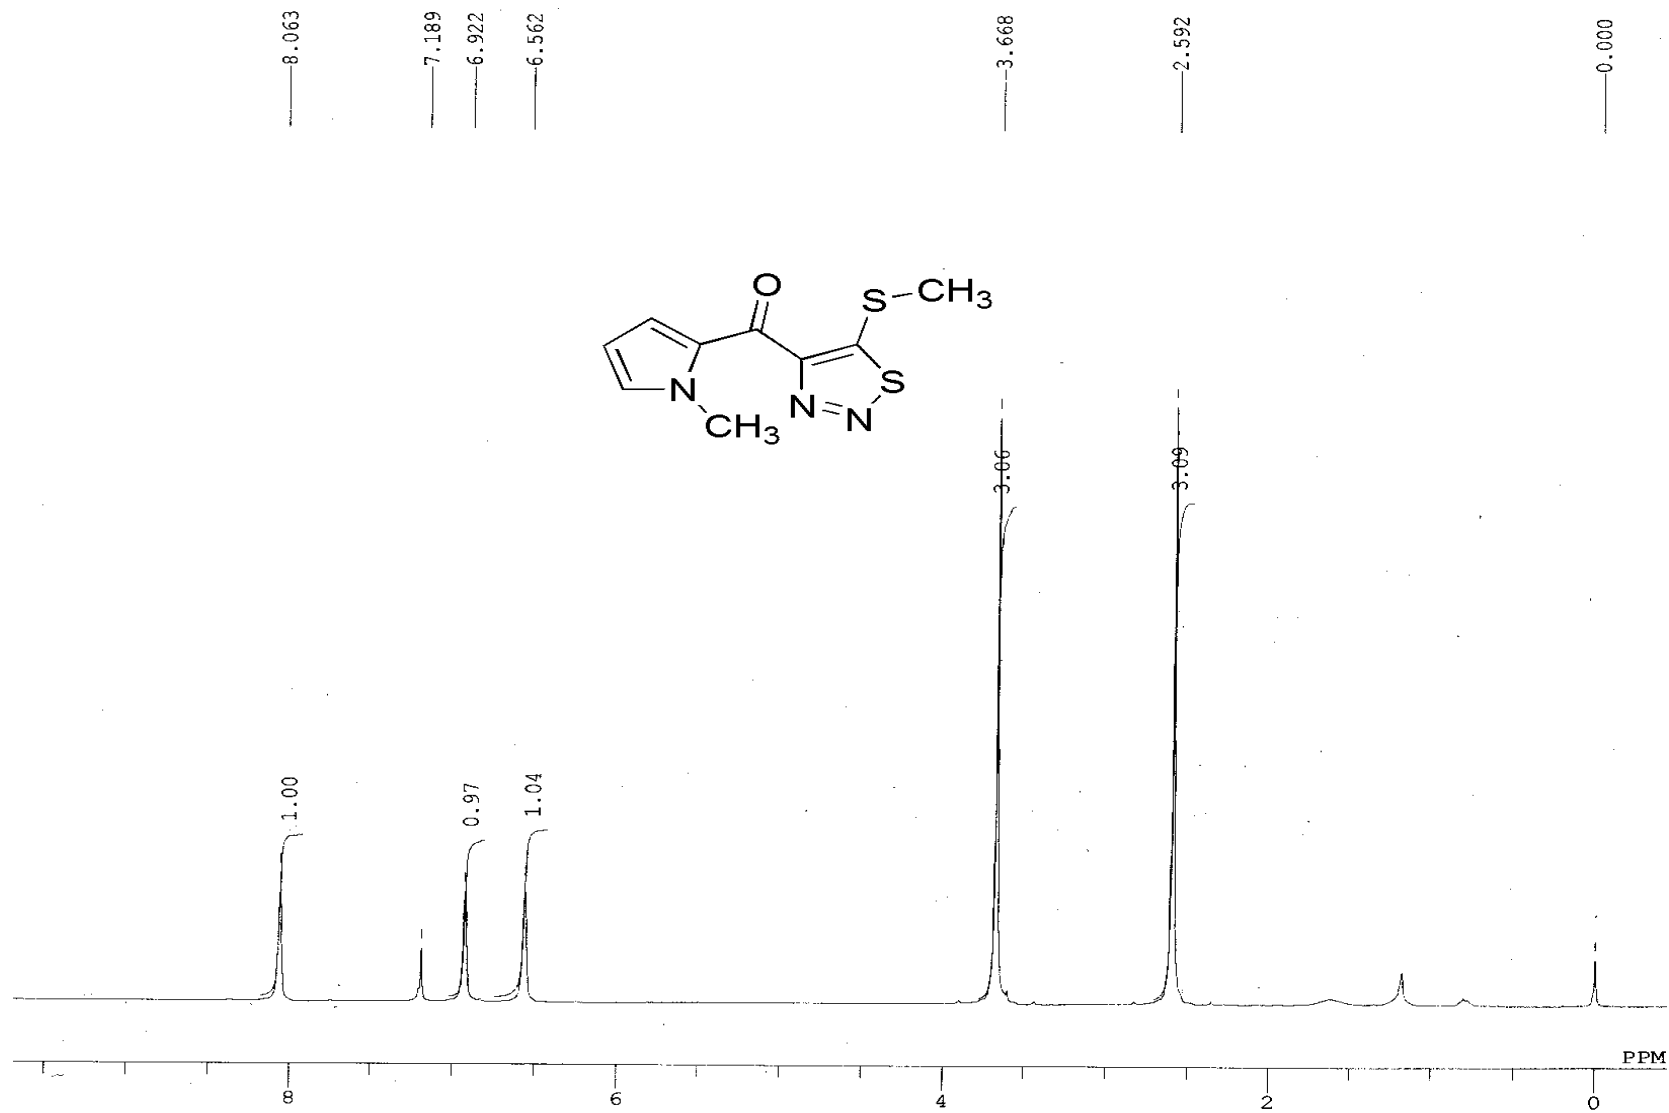

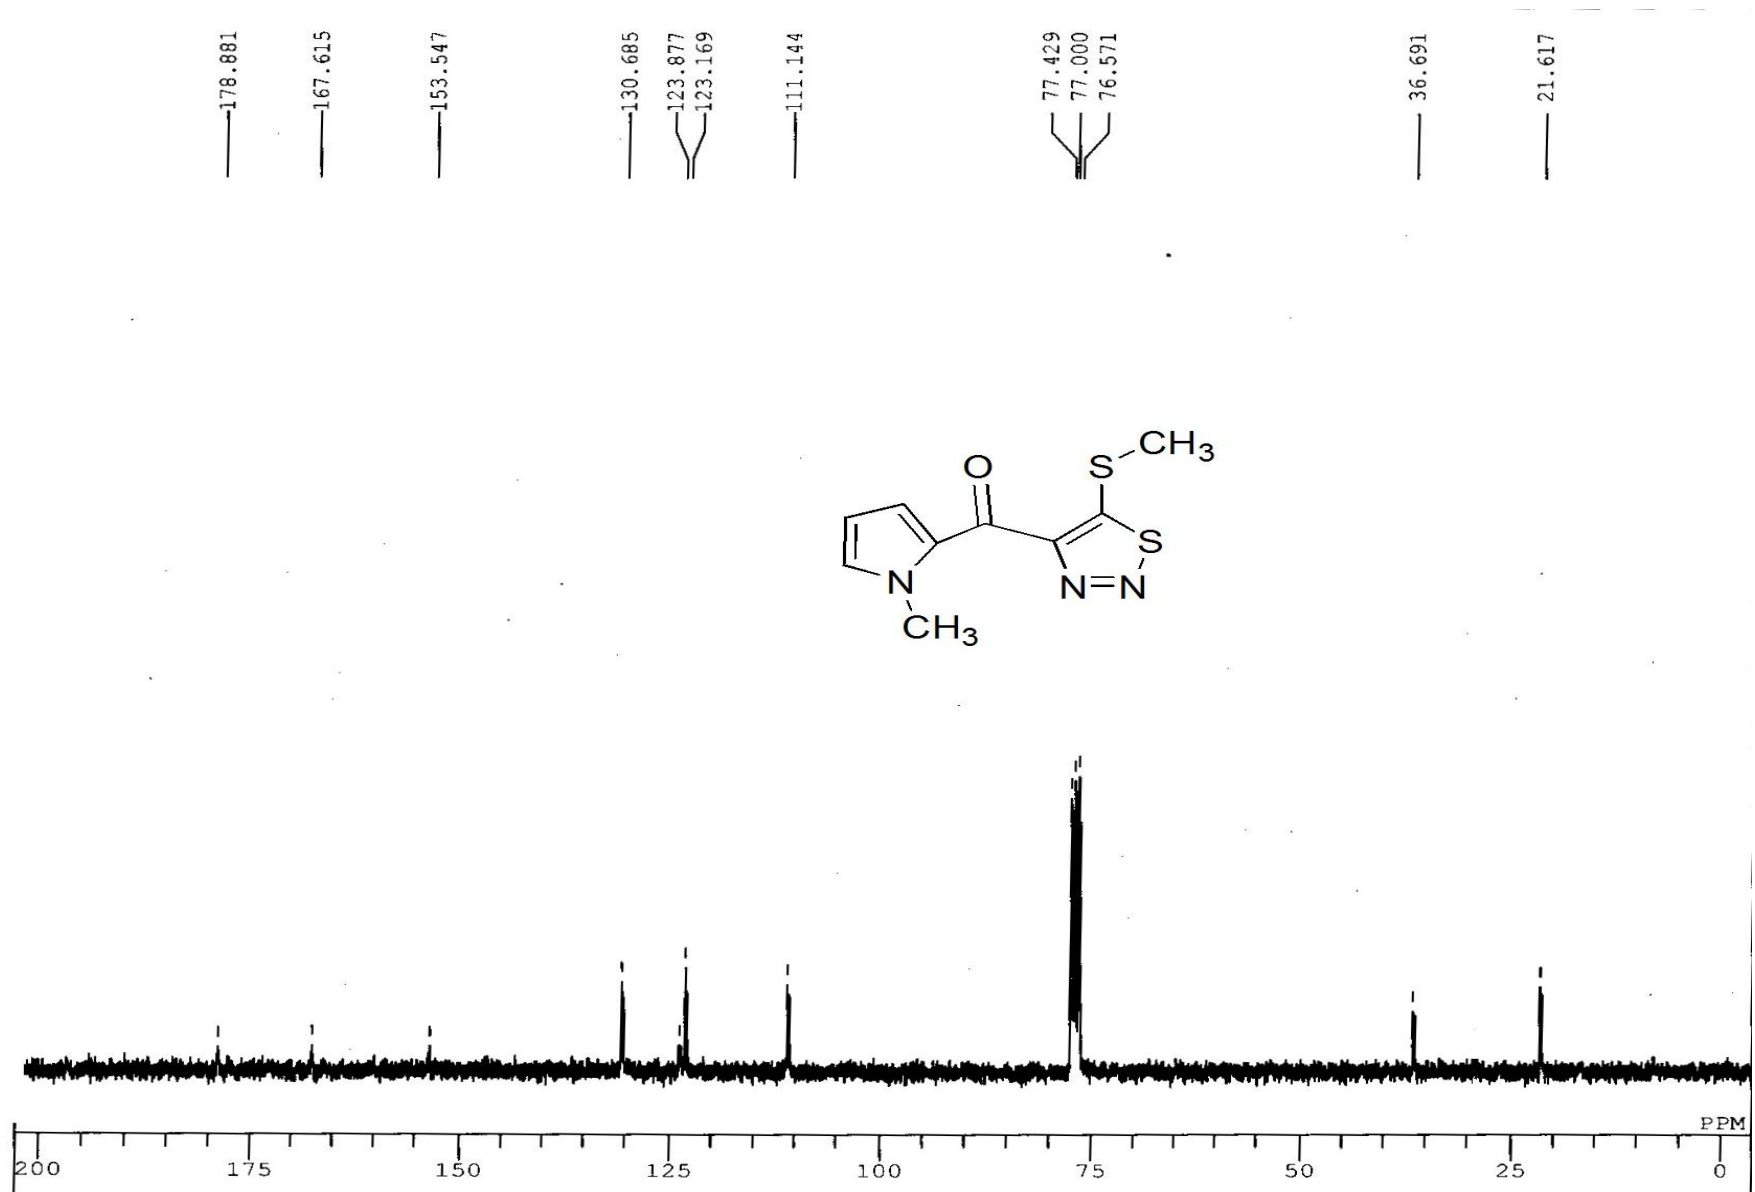

## 12) $^1\text{H}$ & $^{13}\text{C}$ NMR Spectra of 5-Methylsulfanyl-4-(4-phenylbenzoyl)-1,2,3-thiadiazole (3a):

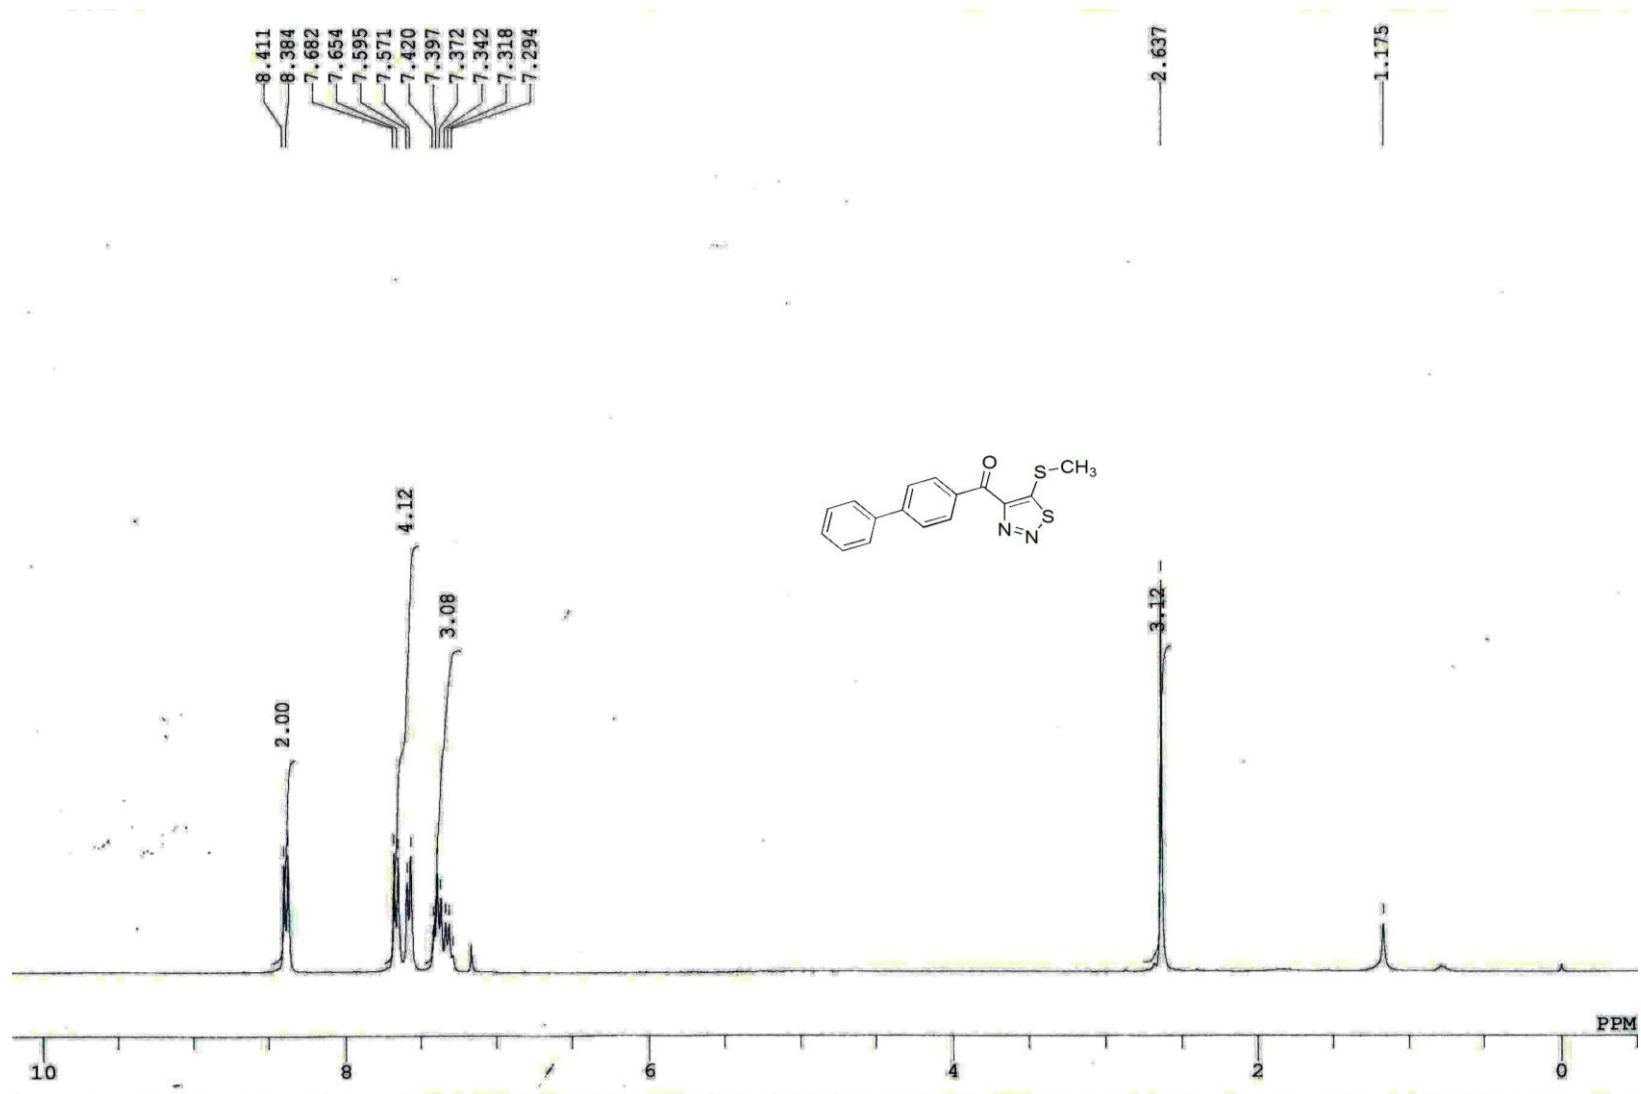



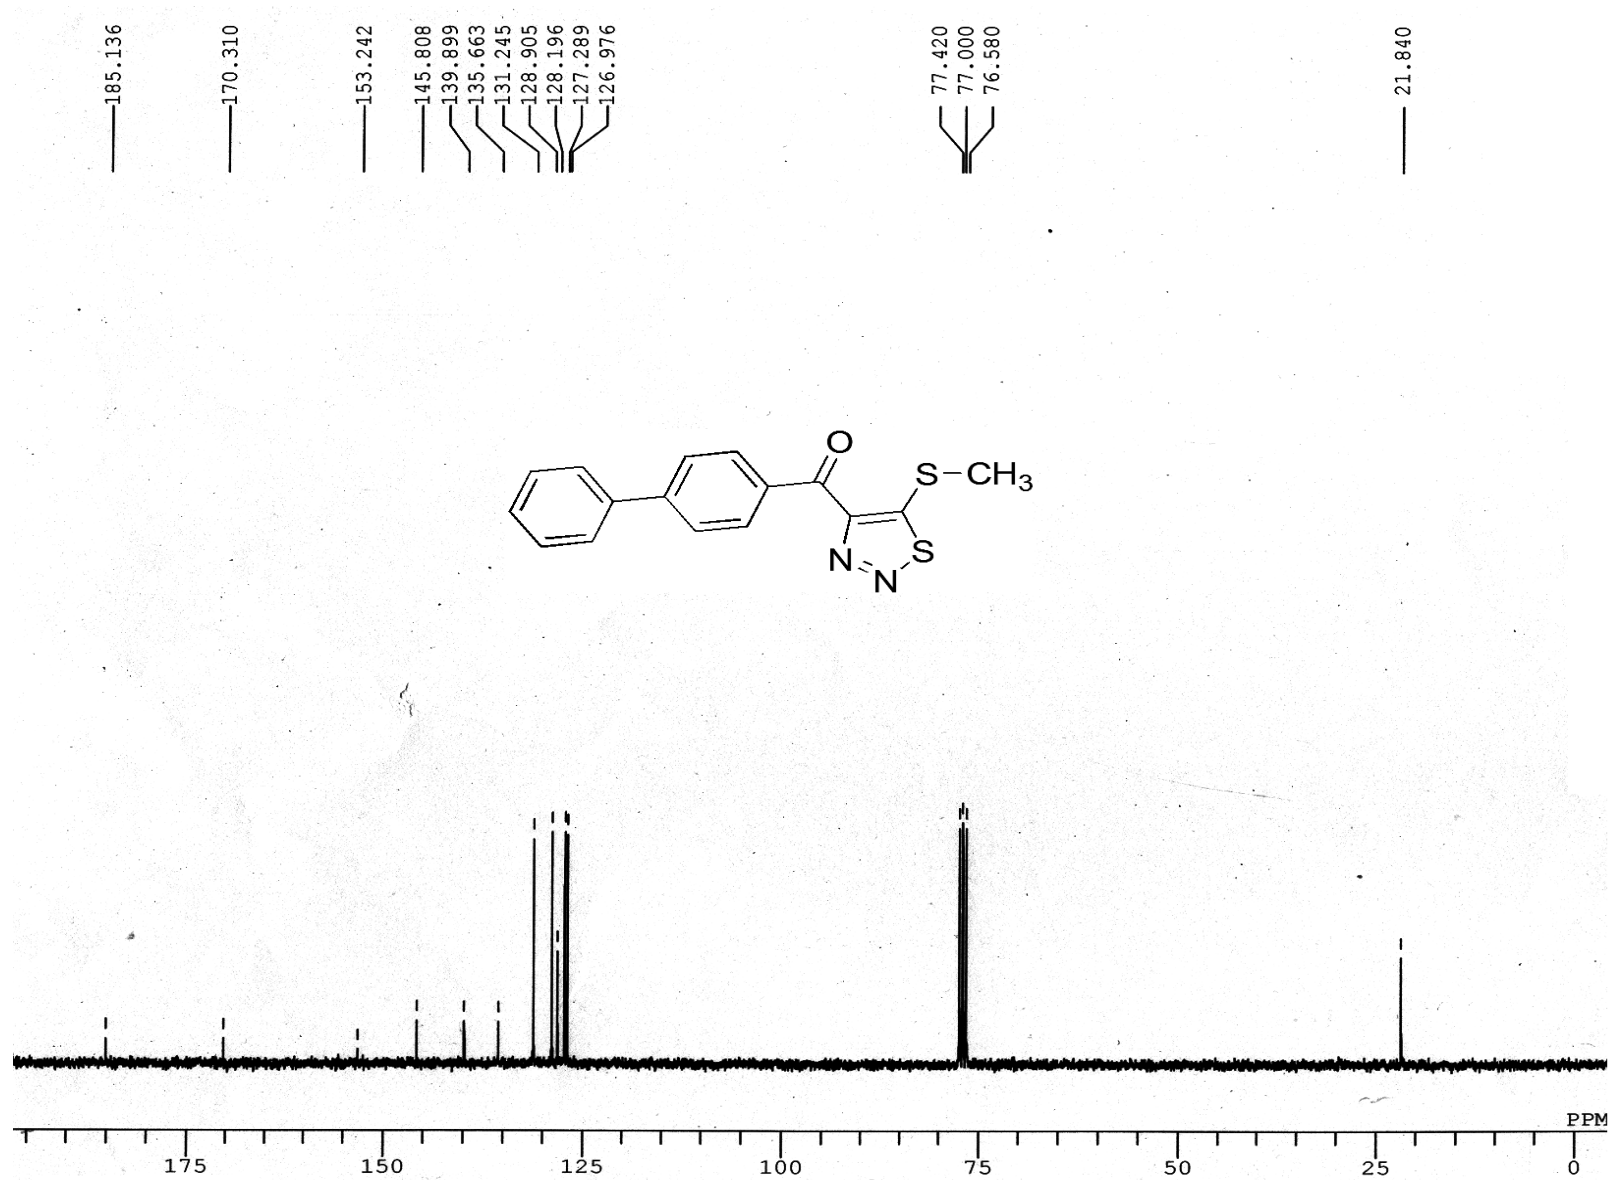

### 13) $^1\text{H}$ & $^{13}\text{C}$ NMR Spectra of 4-Acetyl-5-methylsulfanyl-1,2,3-thiadiazole (3am):

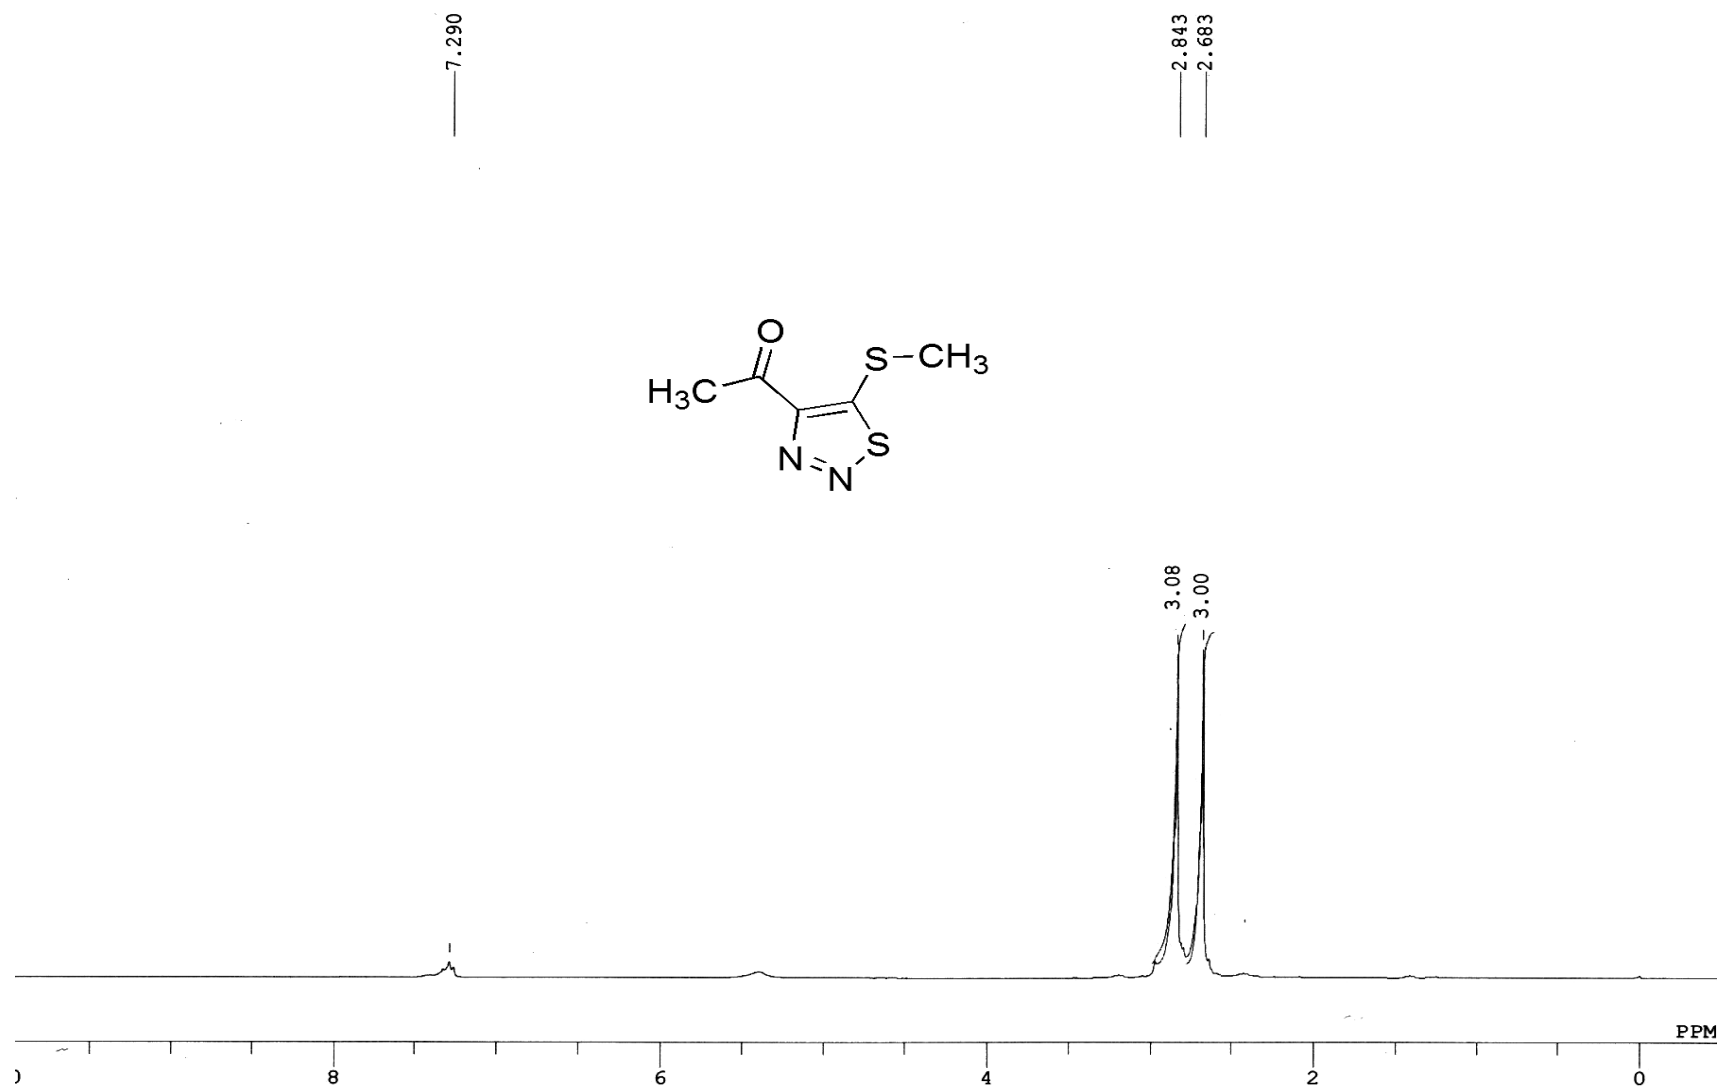

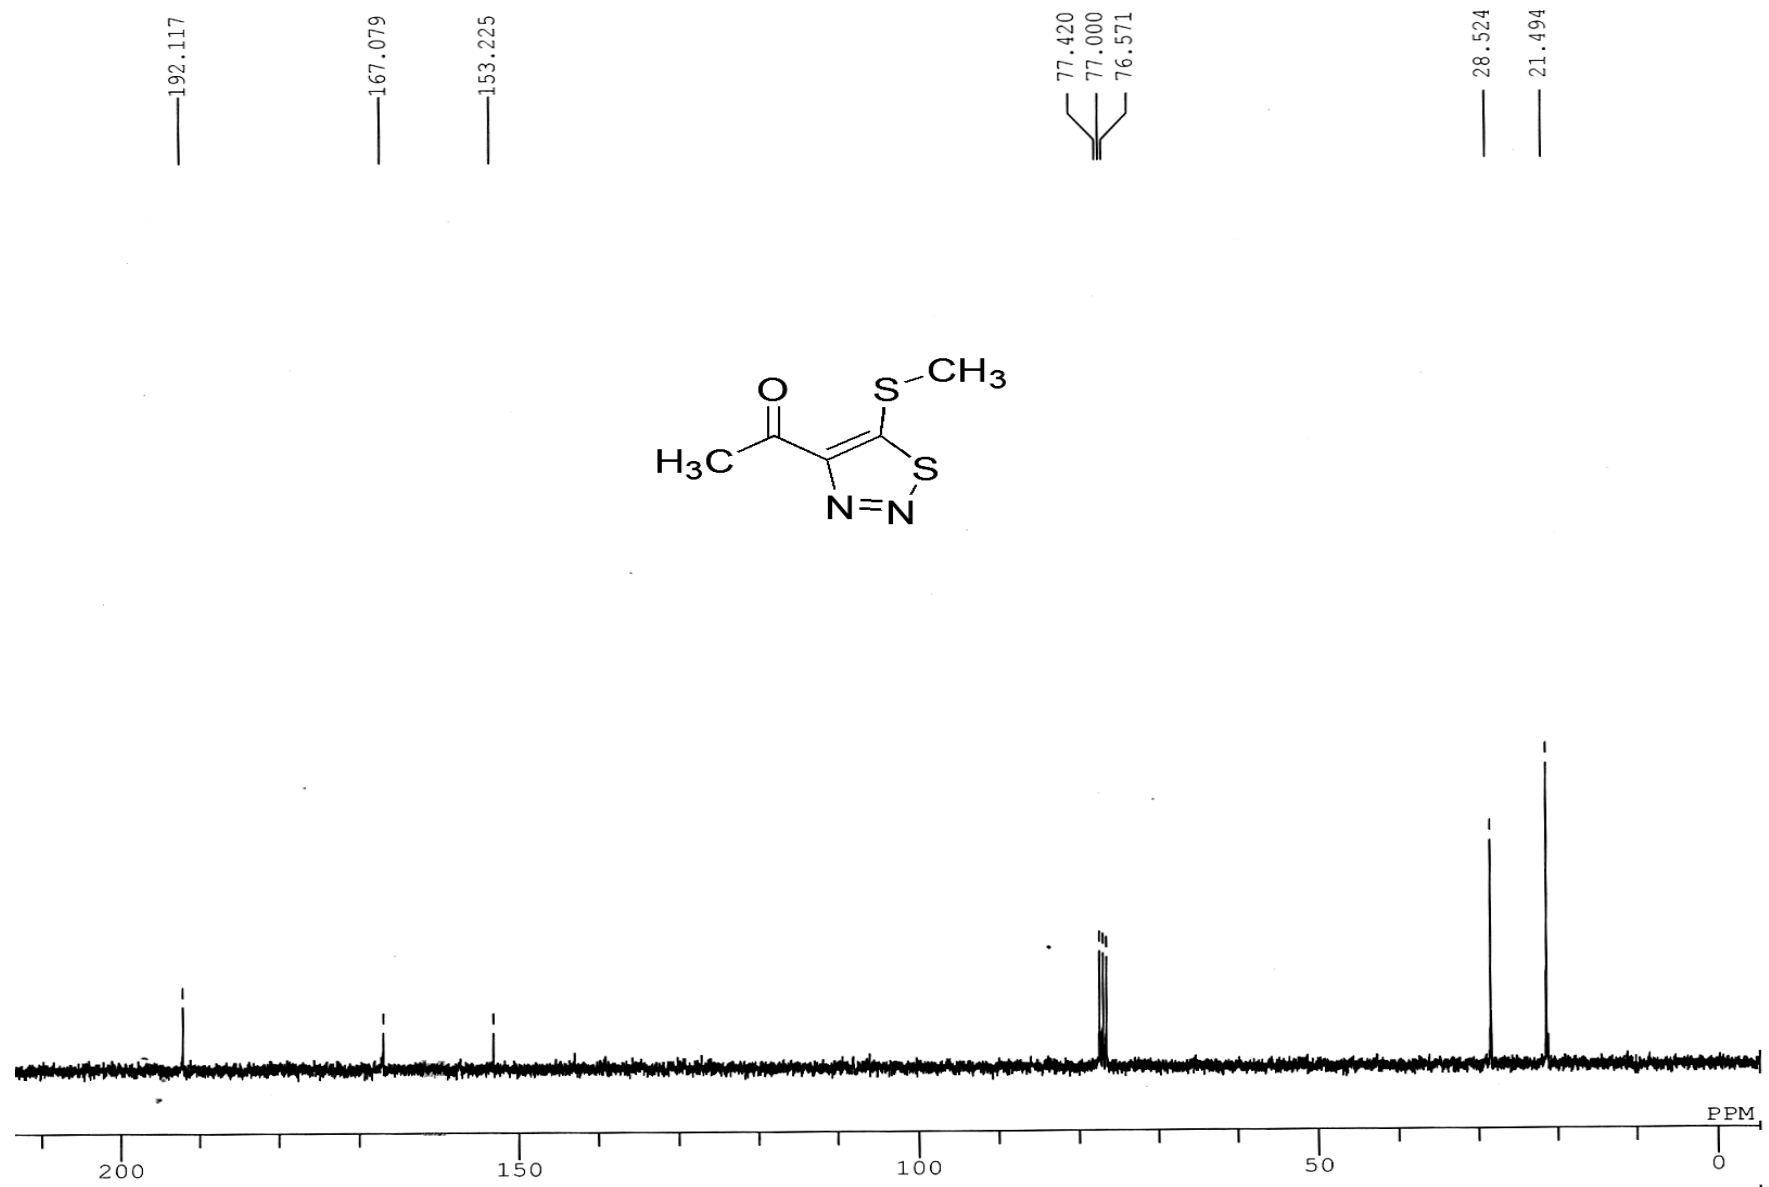

**14)  $^1\text{H}$  &  $^{13}\text{C}$  NMR Spectra of 4-(2,2-dimethylpropan-1-oyl)-5-methylsulfanyl-1,2,3-thiadiazole (3an):**

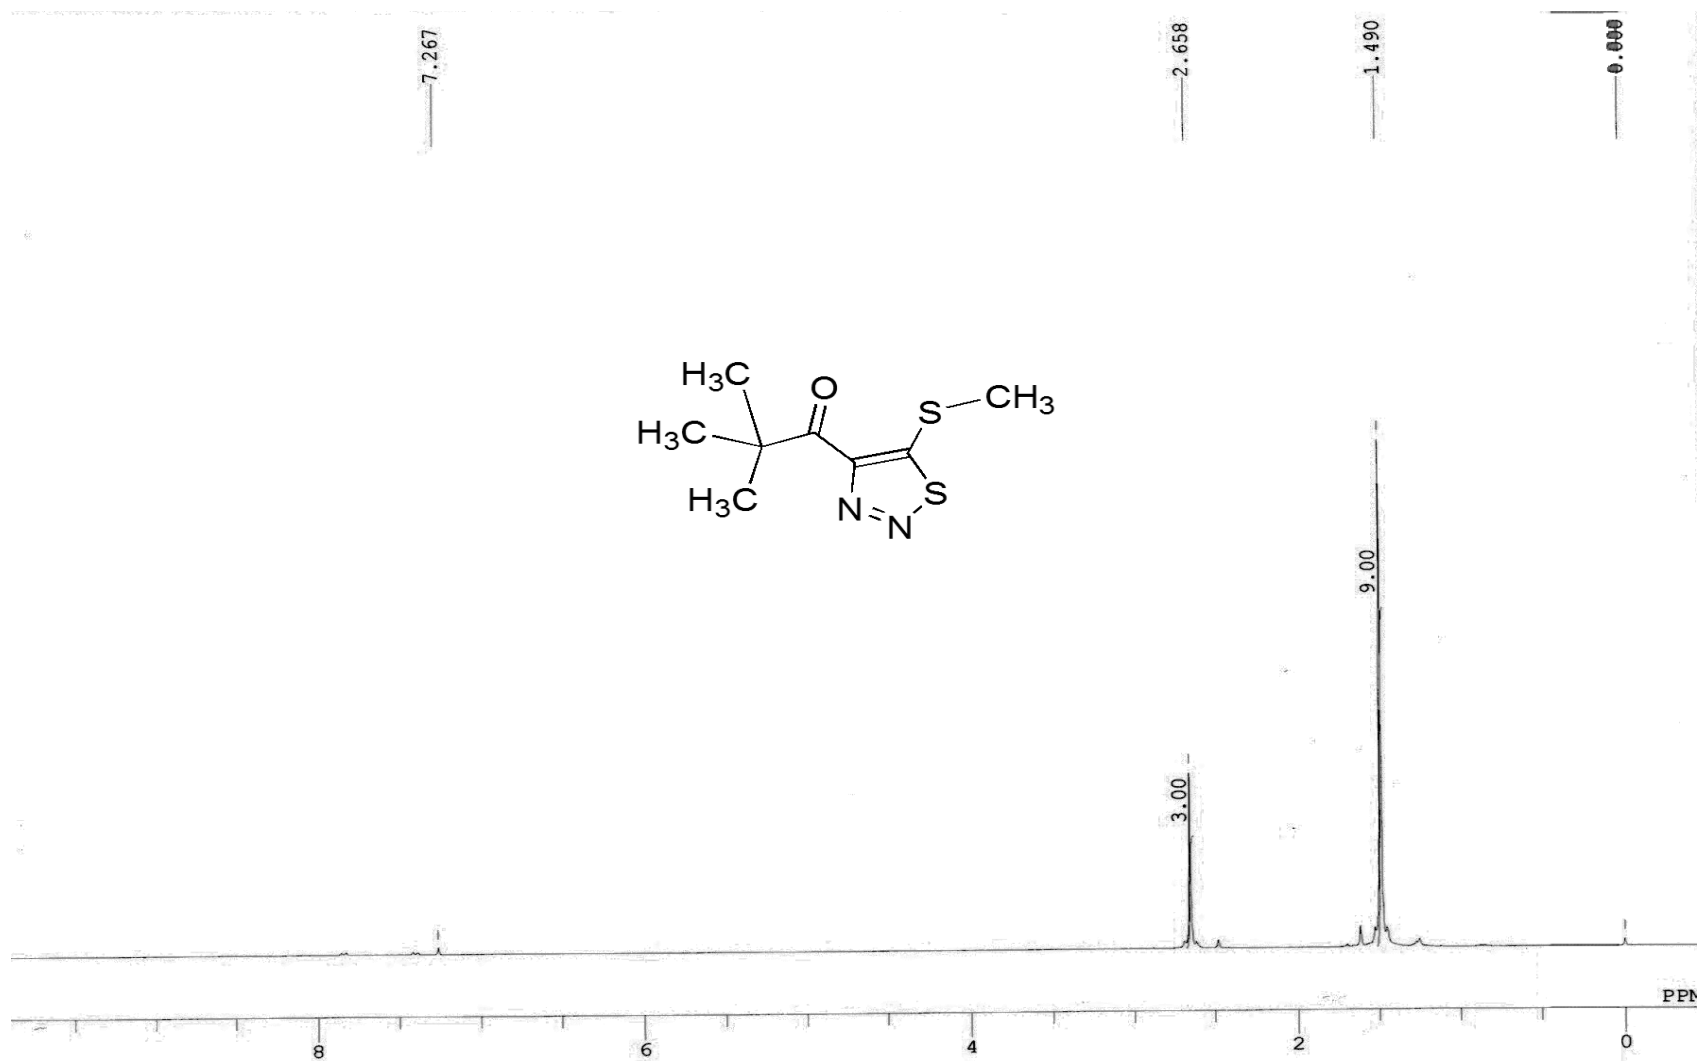

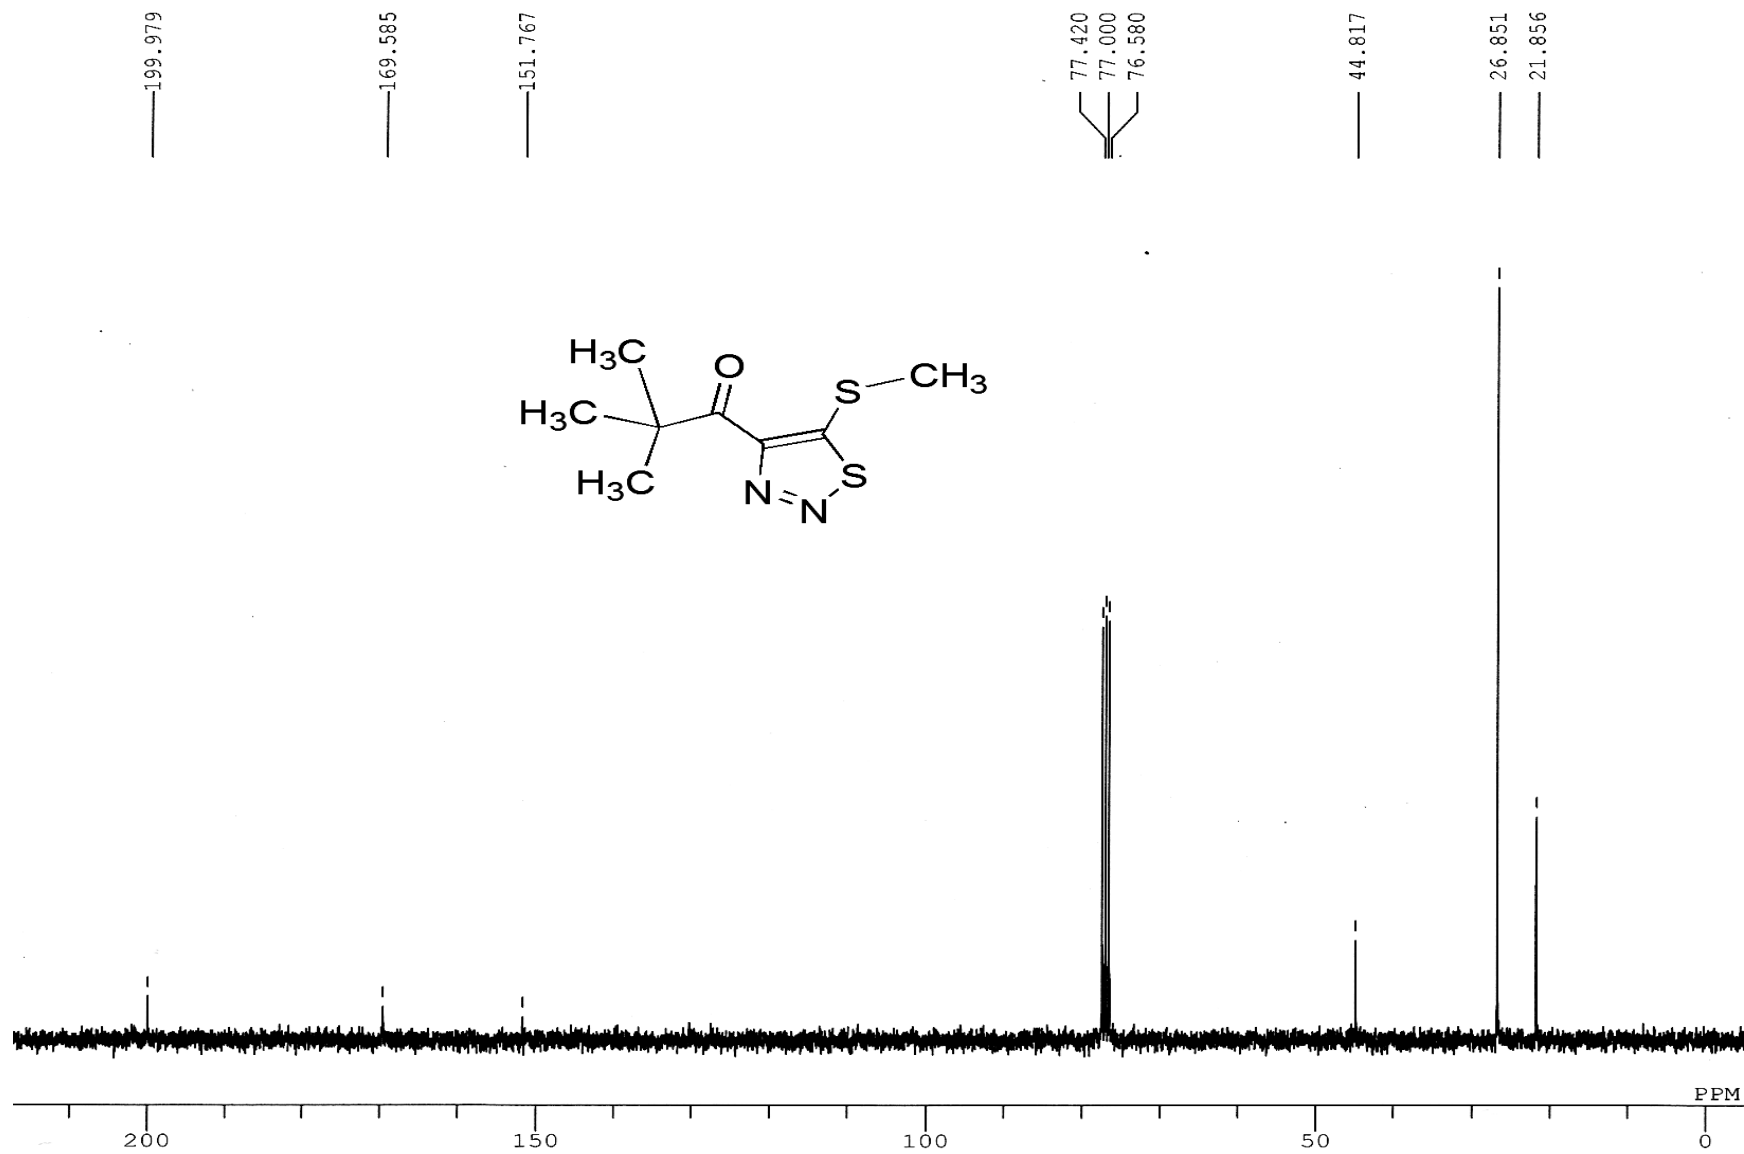

### 15) $^1\text{H}$ & $^{13}\text{C}$ NMR Spectra of 4-Benzoyl-5-ethylsulfanyl-1,2,3-thiadiazole (3ba):

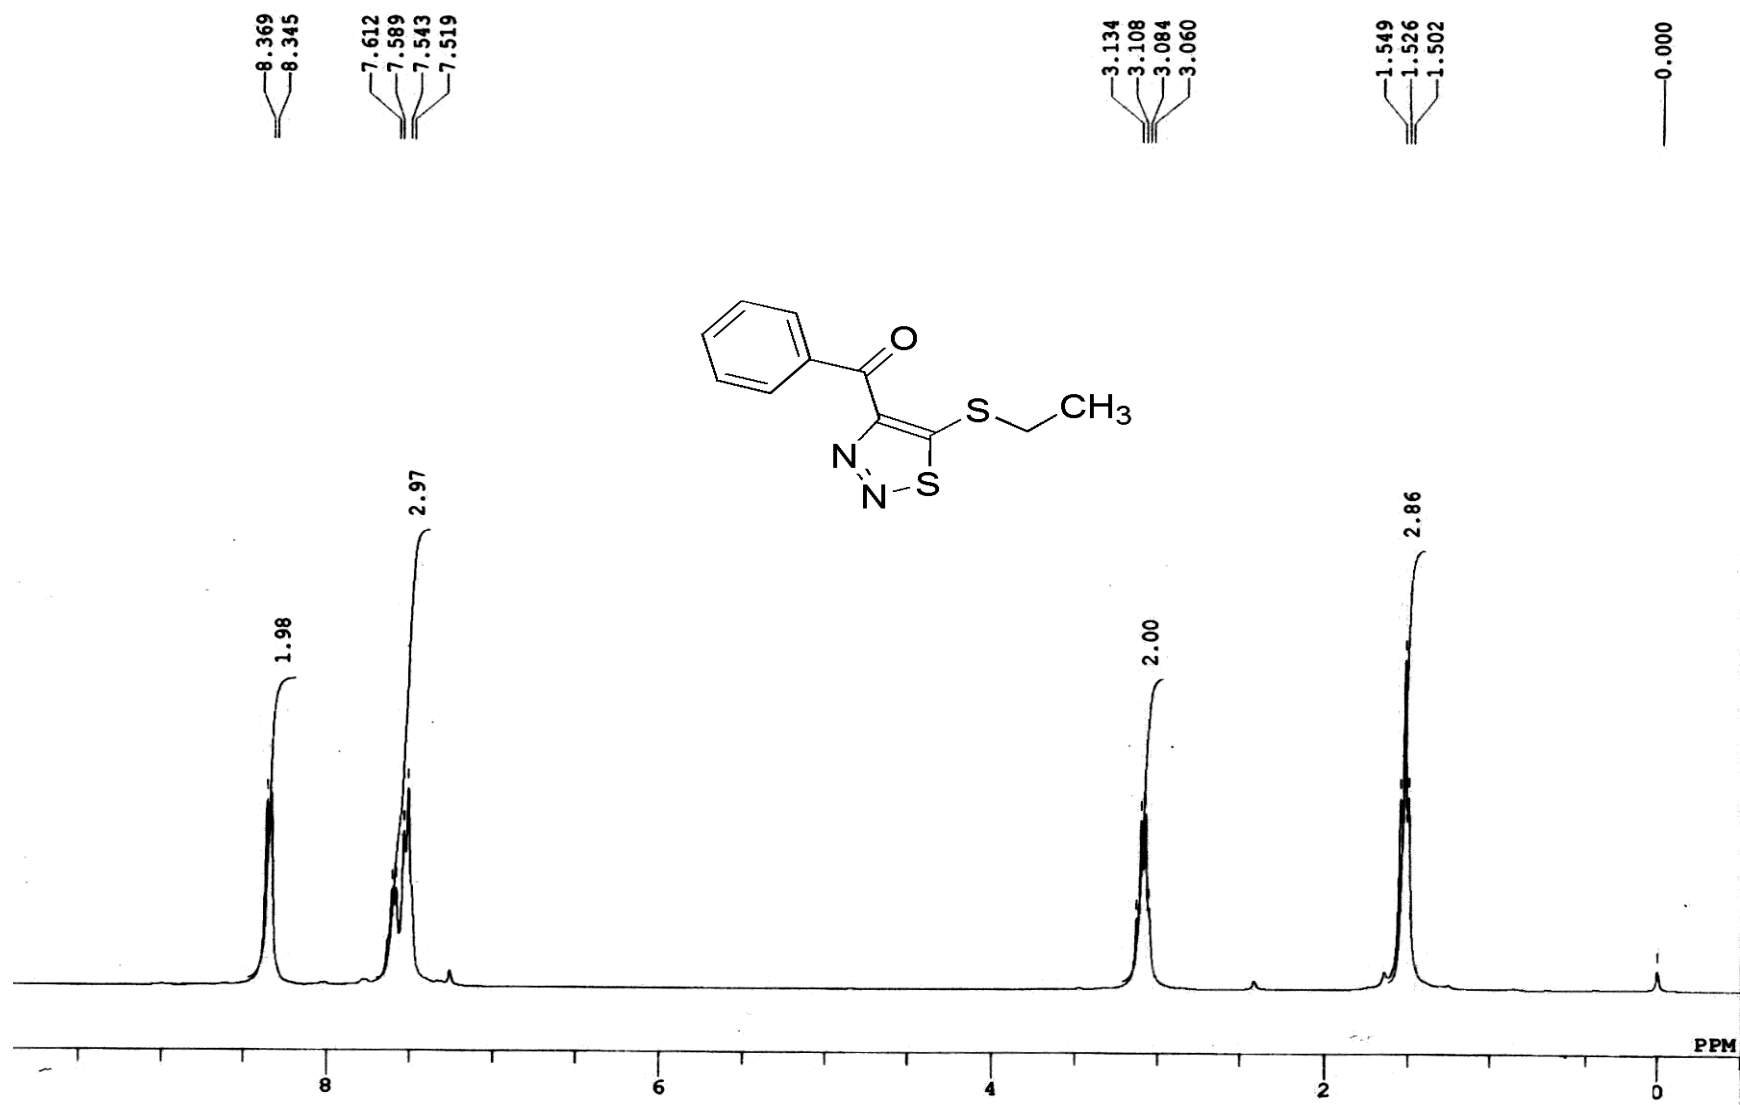

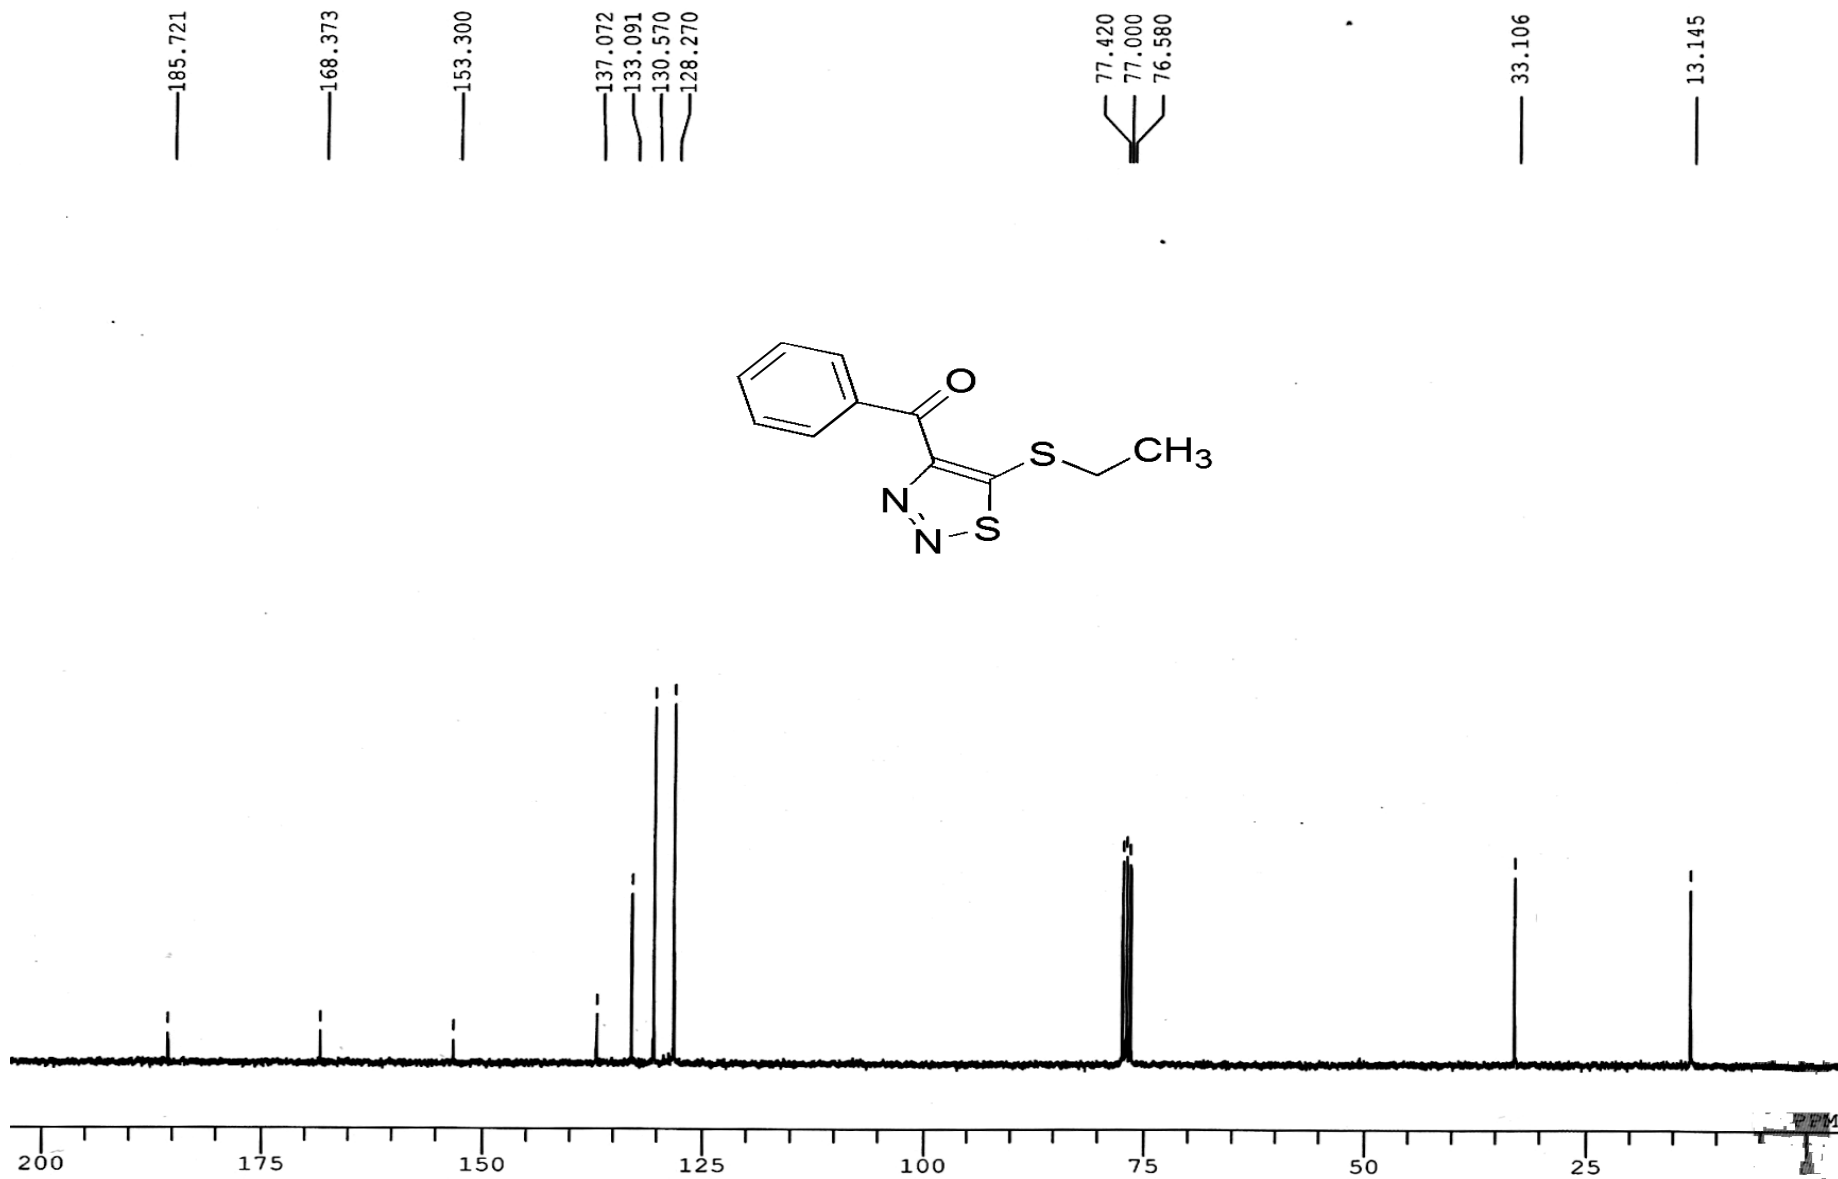

### 16) $^1\text{H}$ & $^{13}\text{C}$ NMR Spectra of 4-Benzoyl-5-(1-propylsulfanyl)-1,2,3-thiadiazole (3ca):

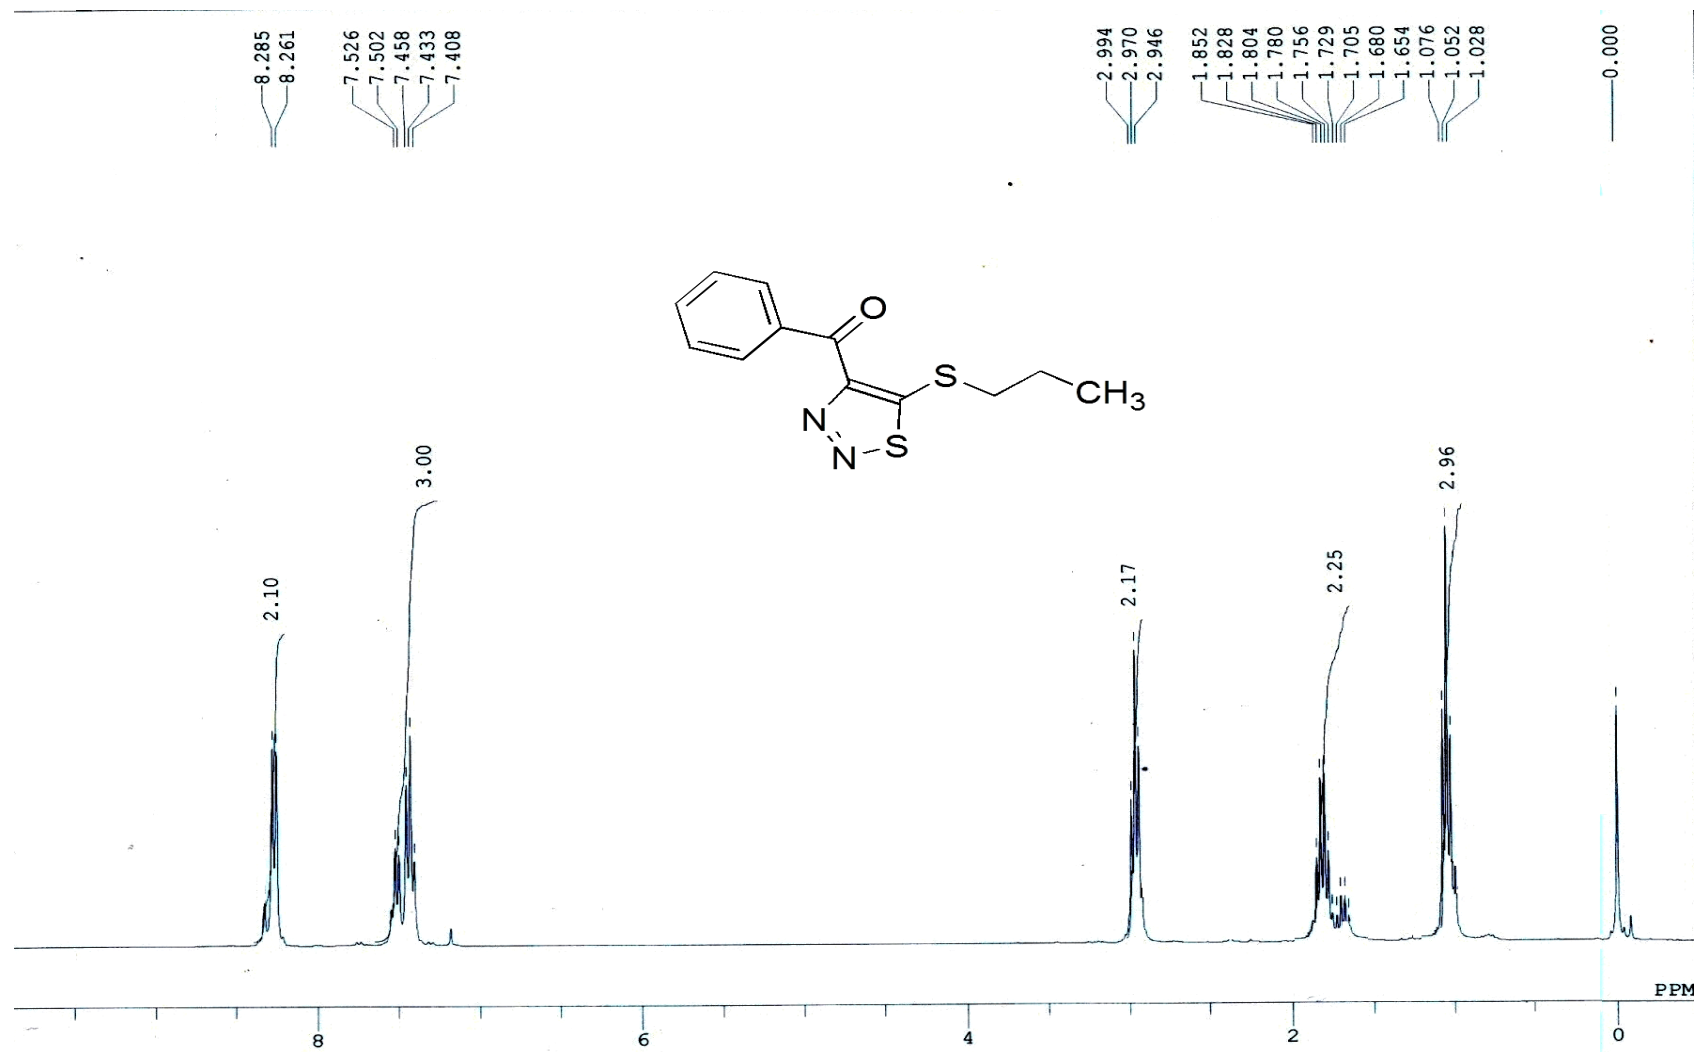



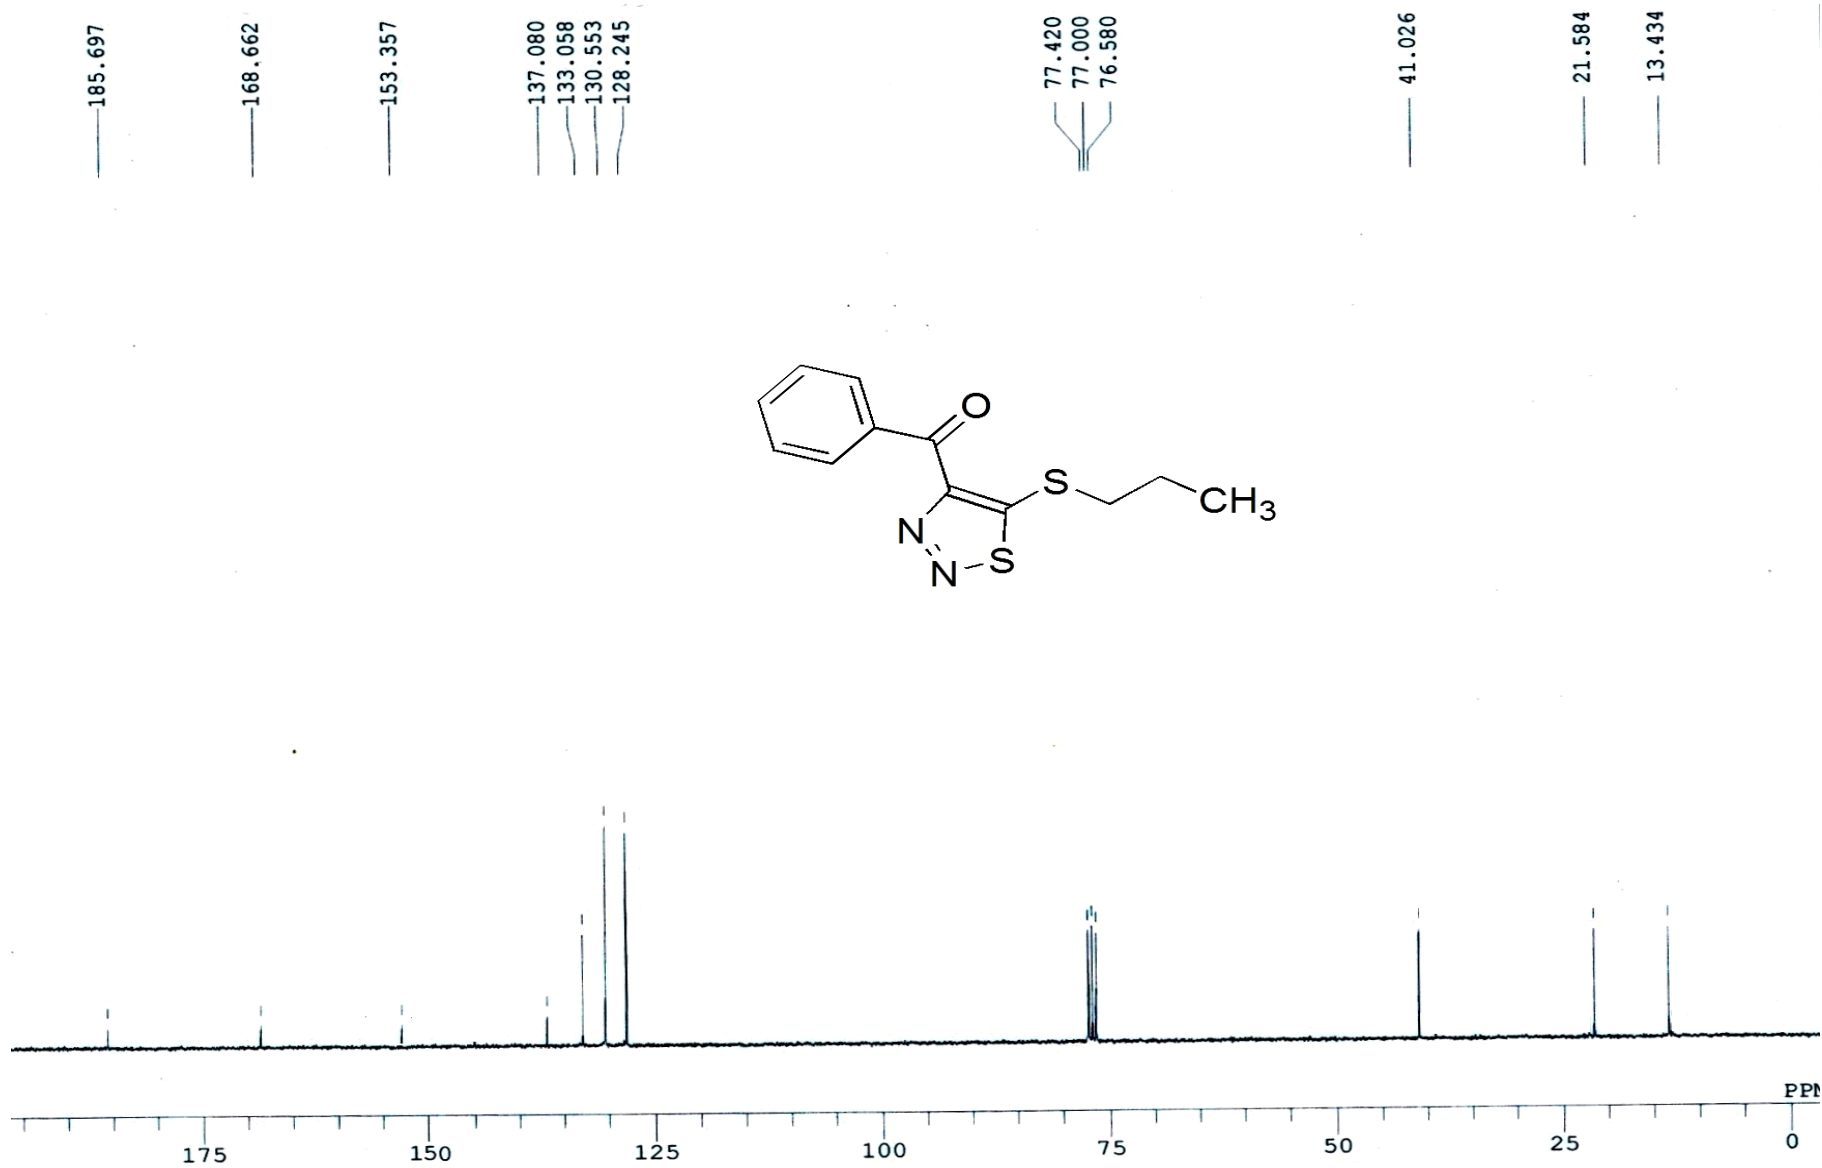

### 17) $^1\text{H}$ & $^{13}\text{C}$ NMR Spectra of 4-Benzoyl-5-(1-butylsulfanyl)-1,2,3-thiadiazole (3da):

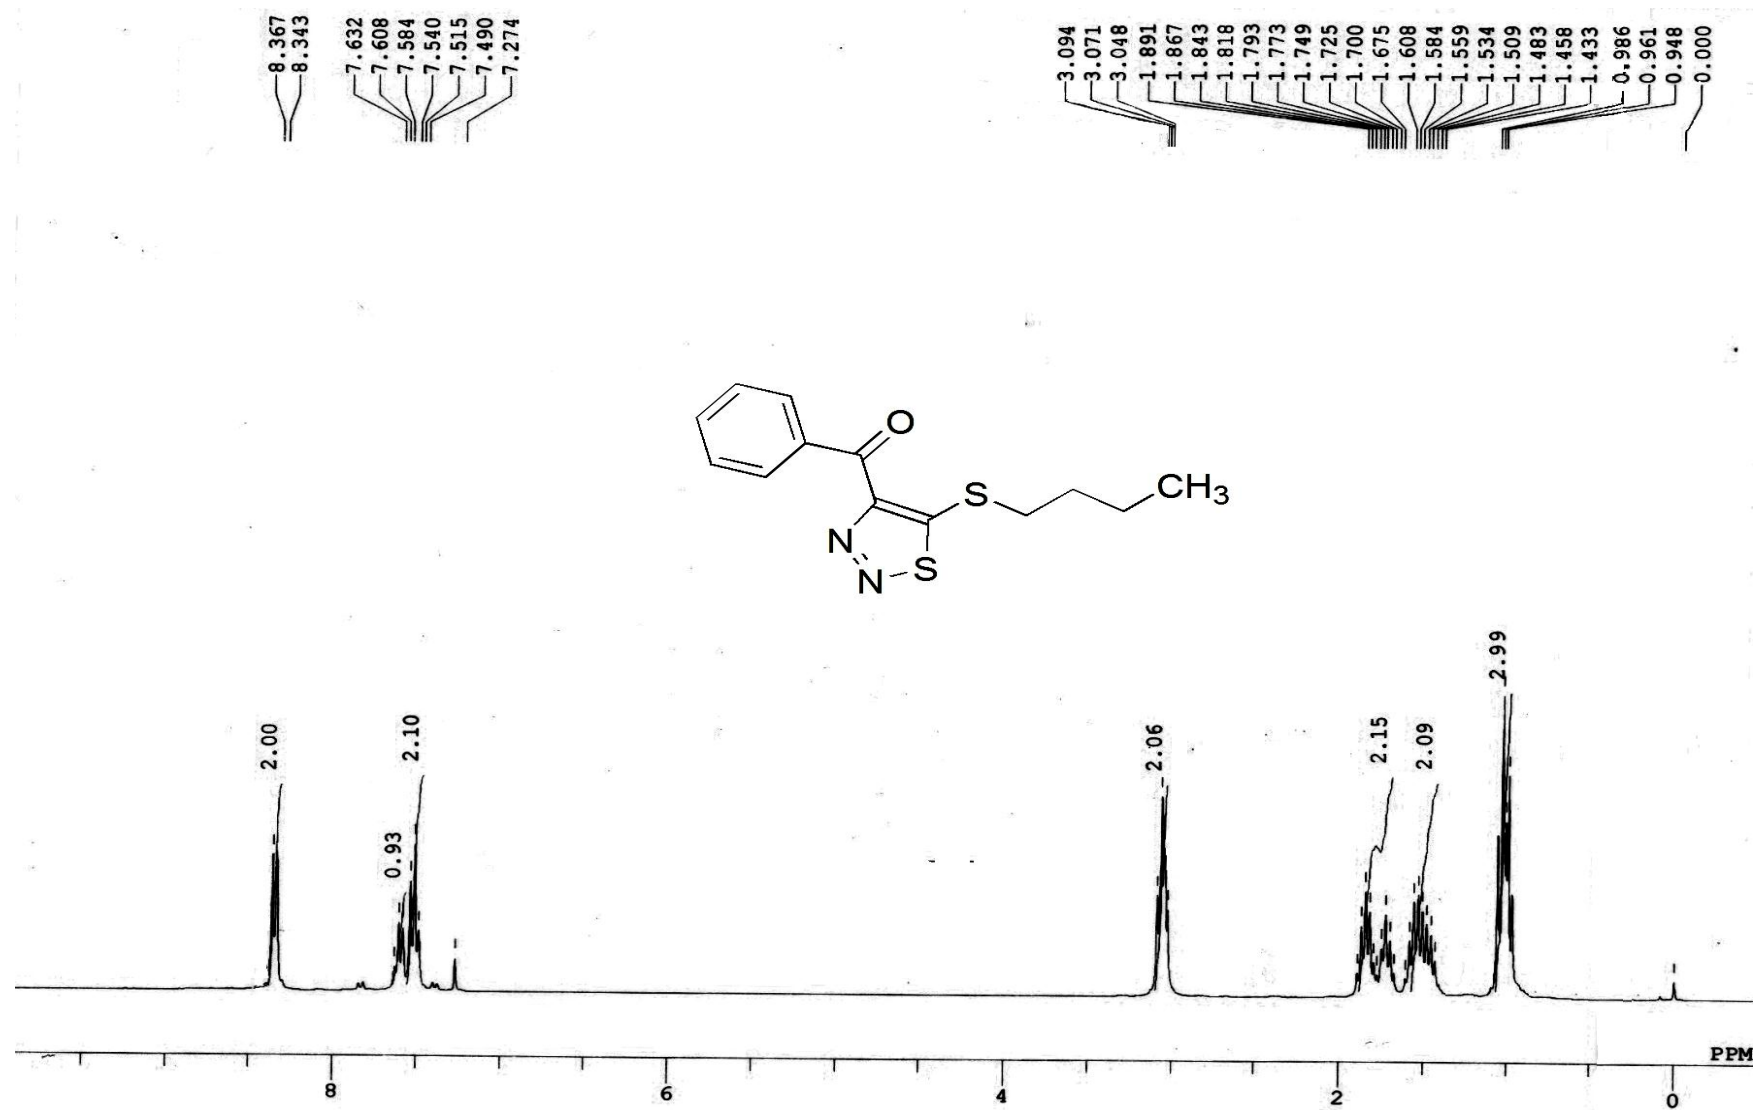

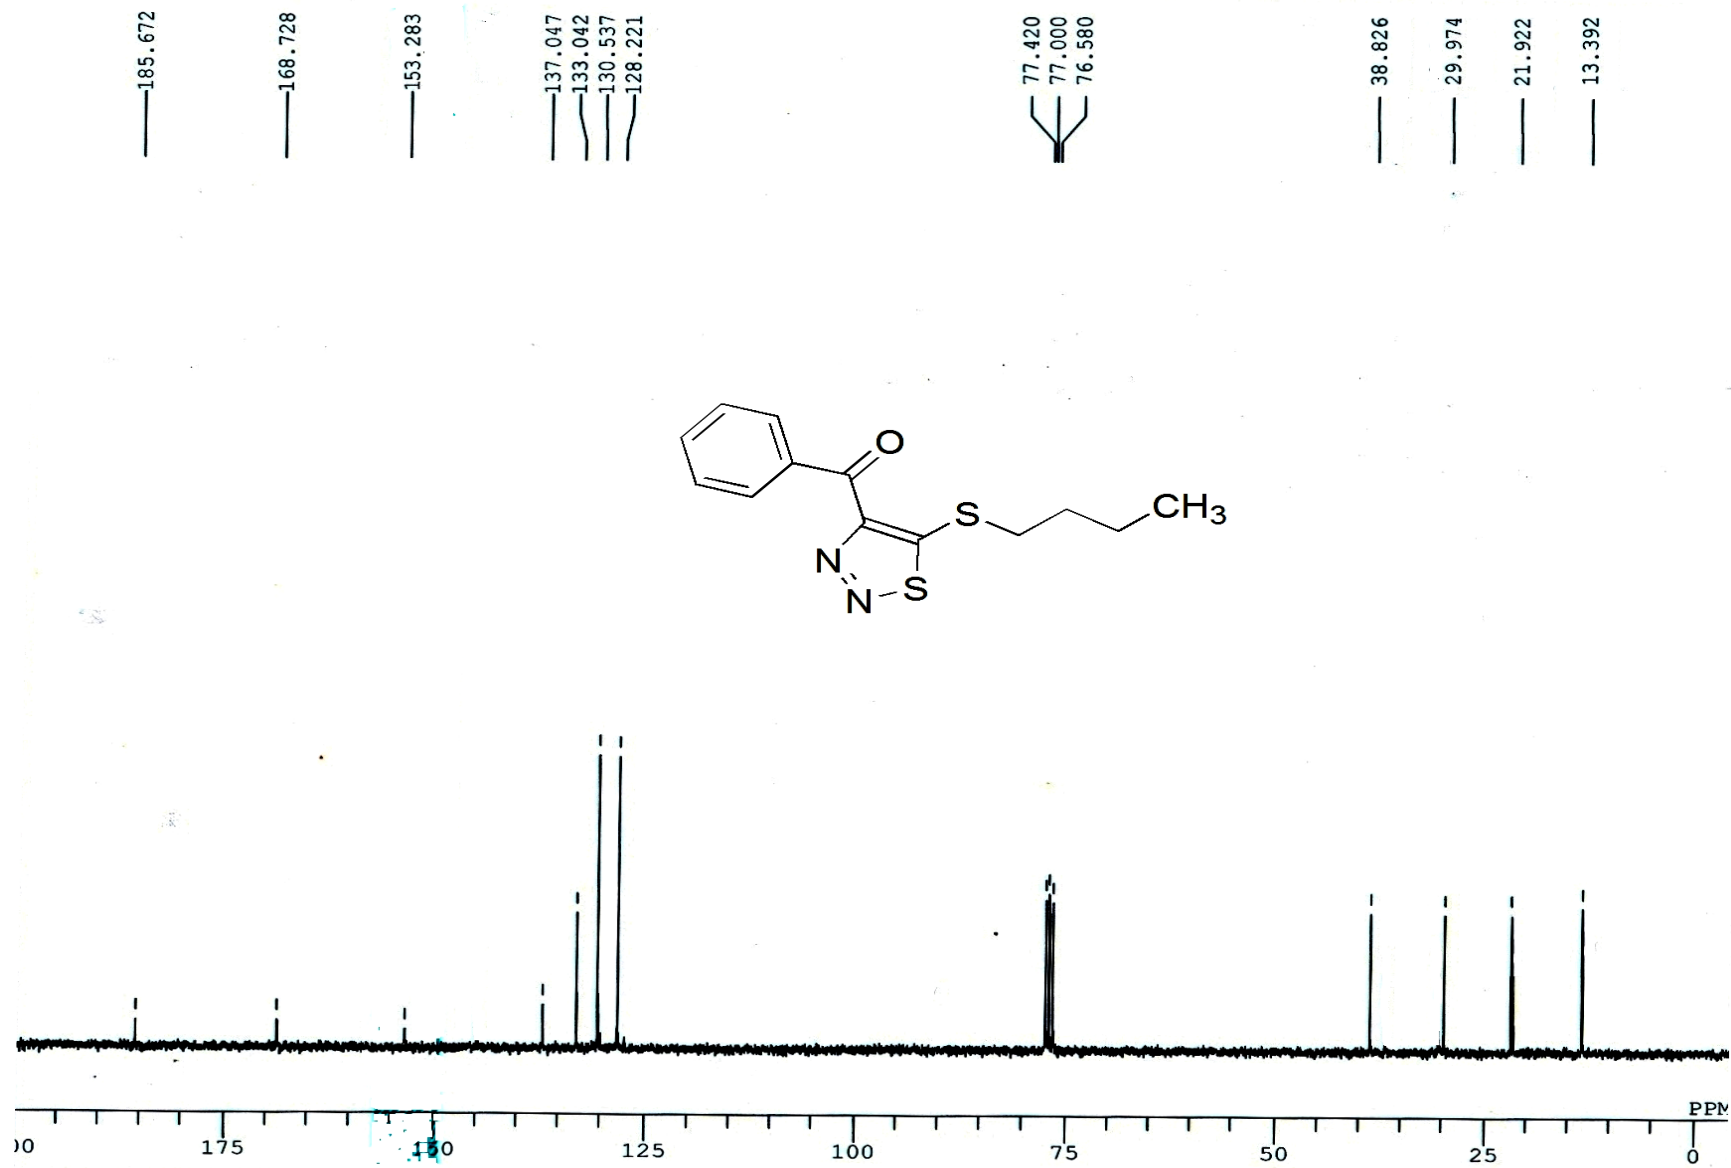

**18)  $^1\text{H}$  &  $^{13}\text{C}$  NMR Spectra of 5-(1-Butylsulfanyl)-4-(2,2-dimethylpropan-1-oyl)-1,2,3-thiadiazole (3dn):**

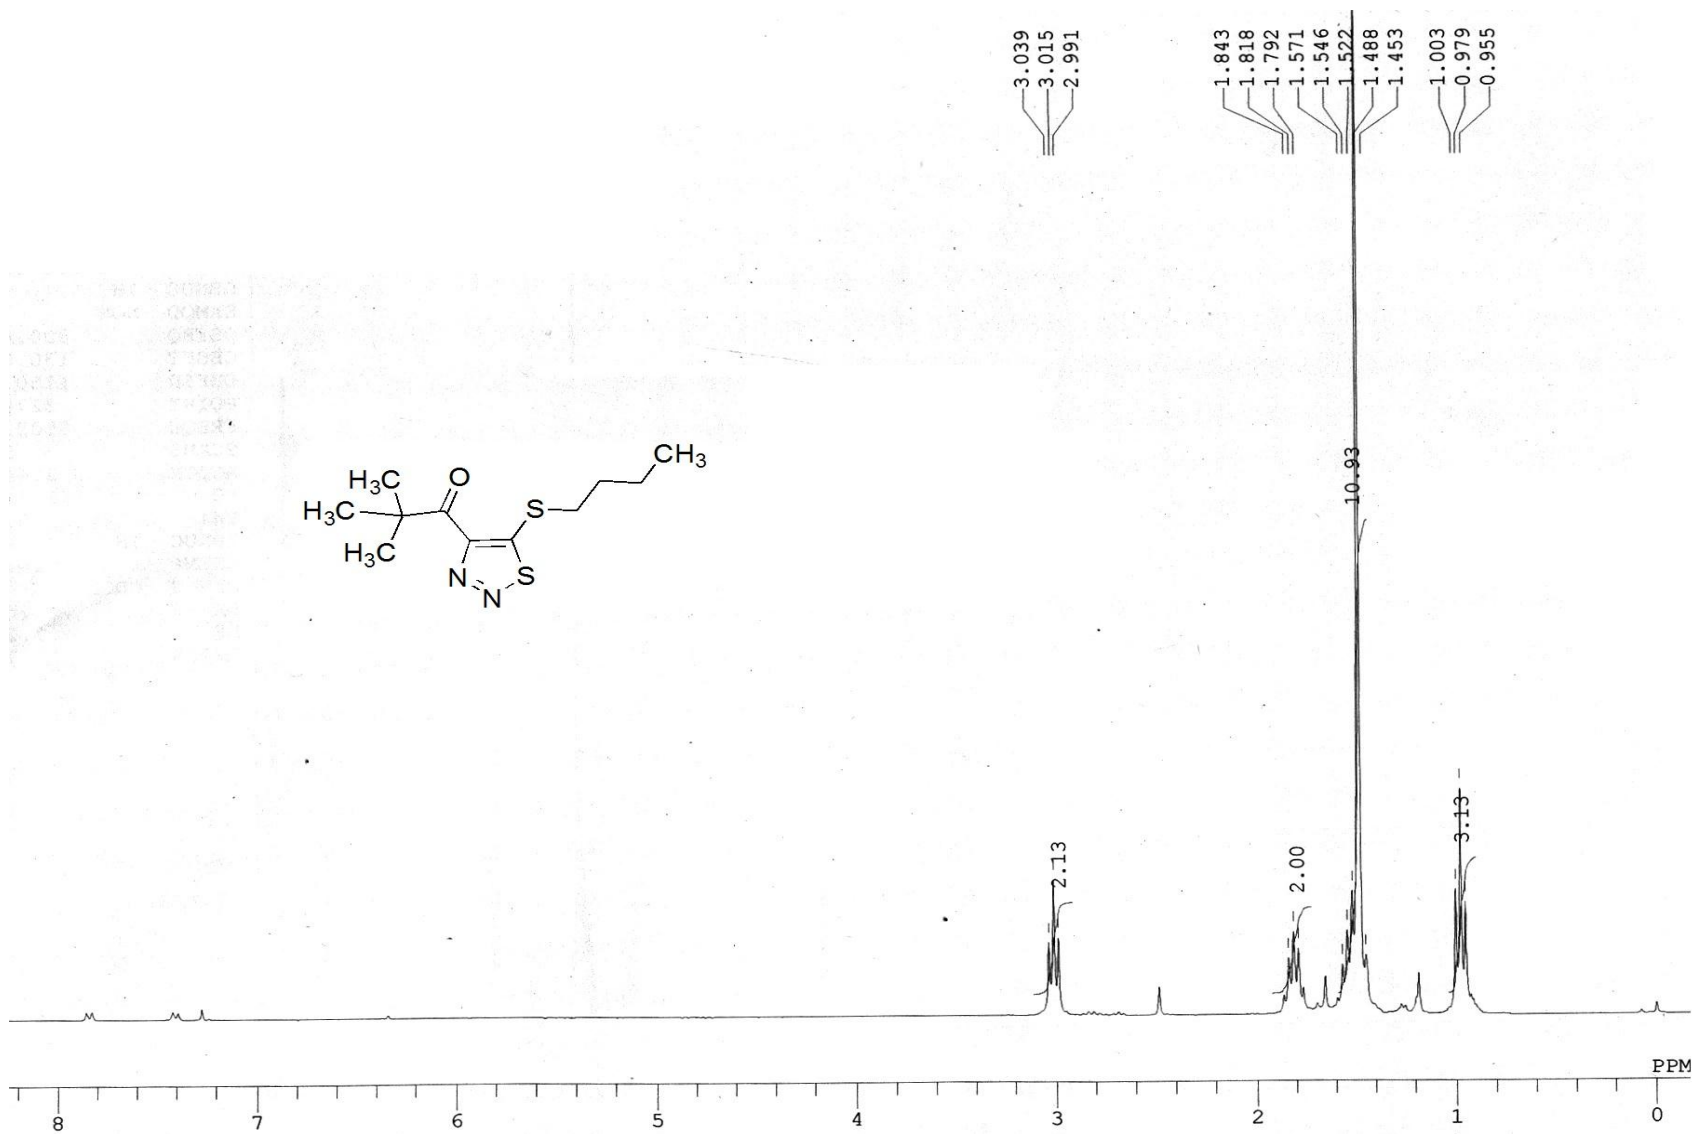

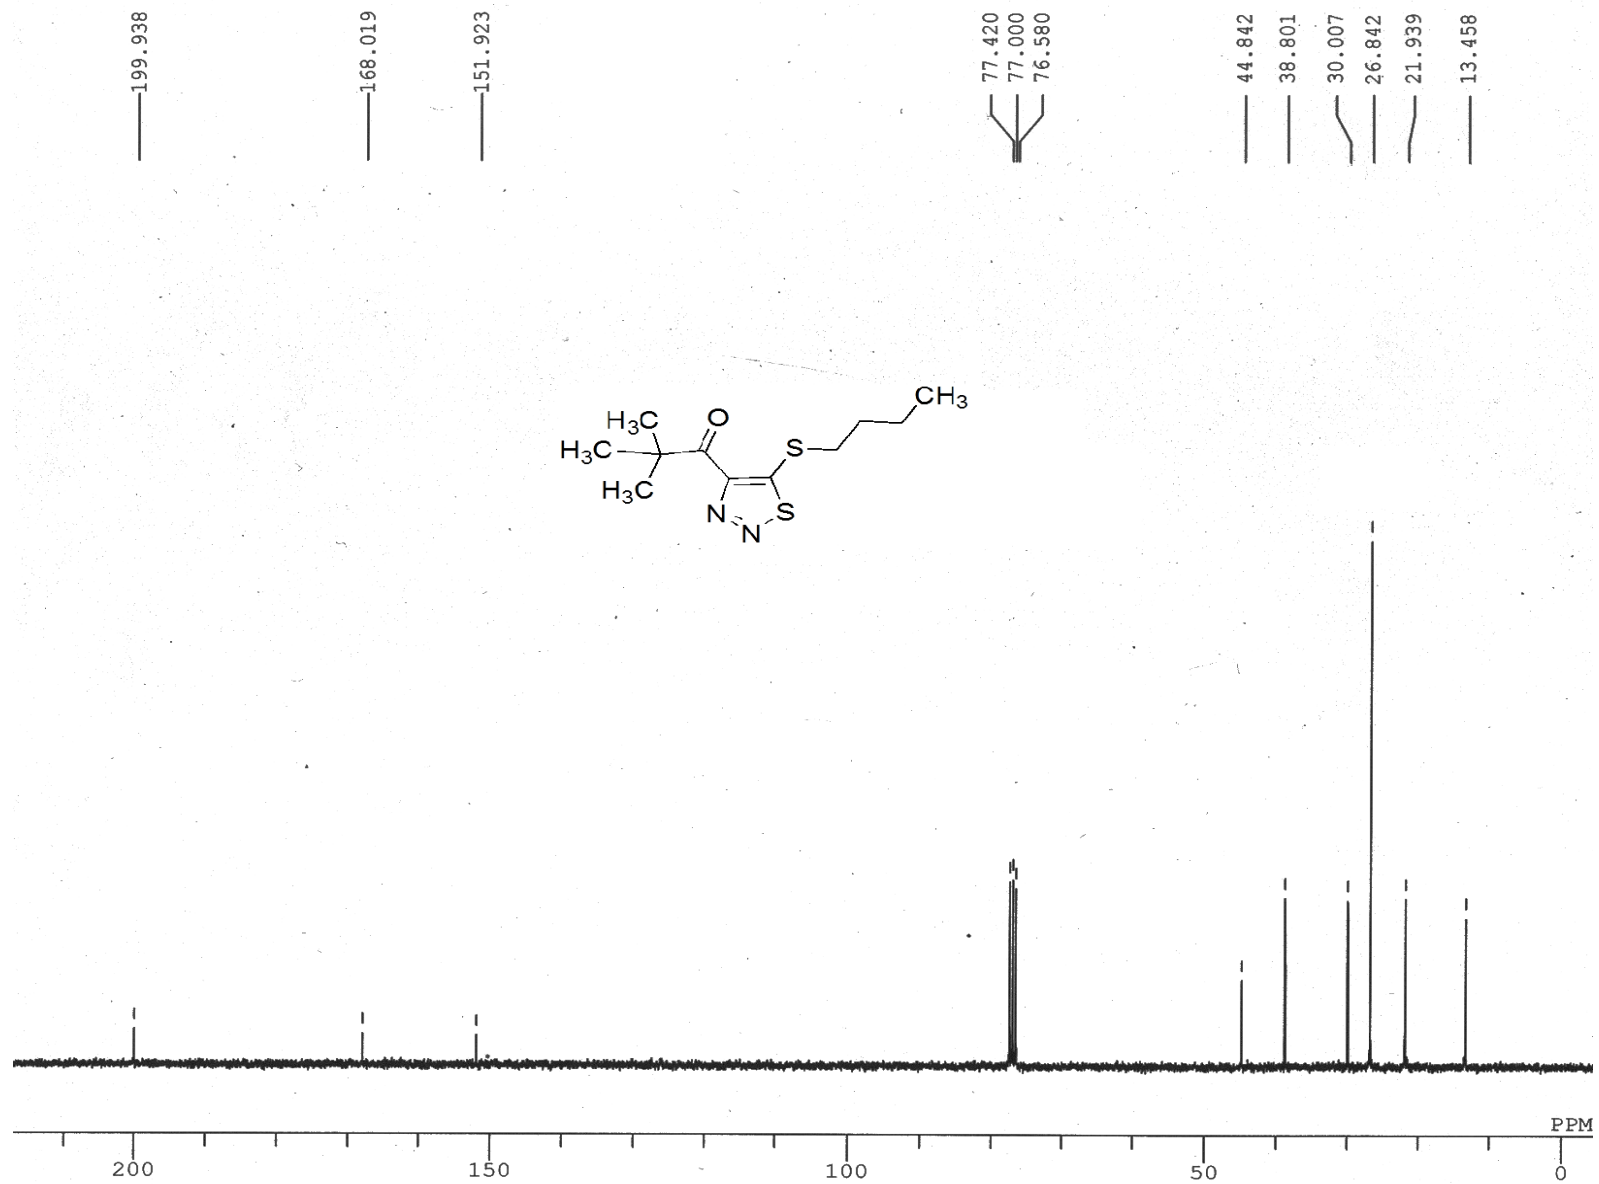

### 19) $^1\text{H}$ & $^{13}\text{C}$ NMR Spectra of 4-Benzoyl-5-(1-pentylsulfanyl)-1,2,3-thiadiazole (3ea):

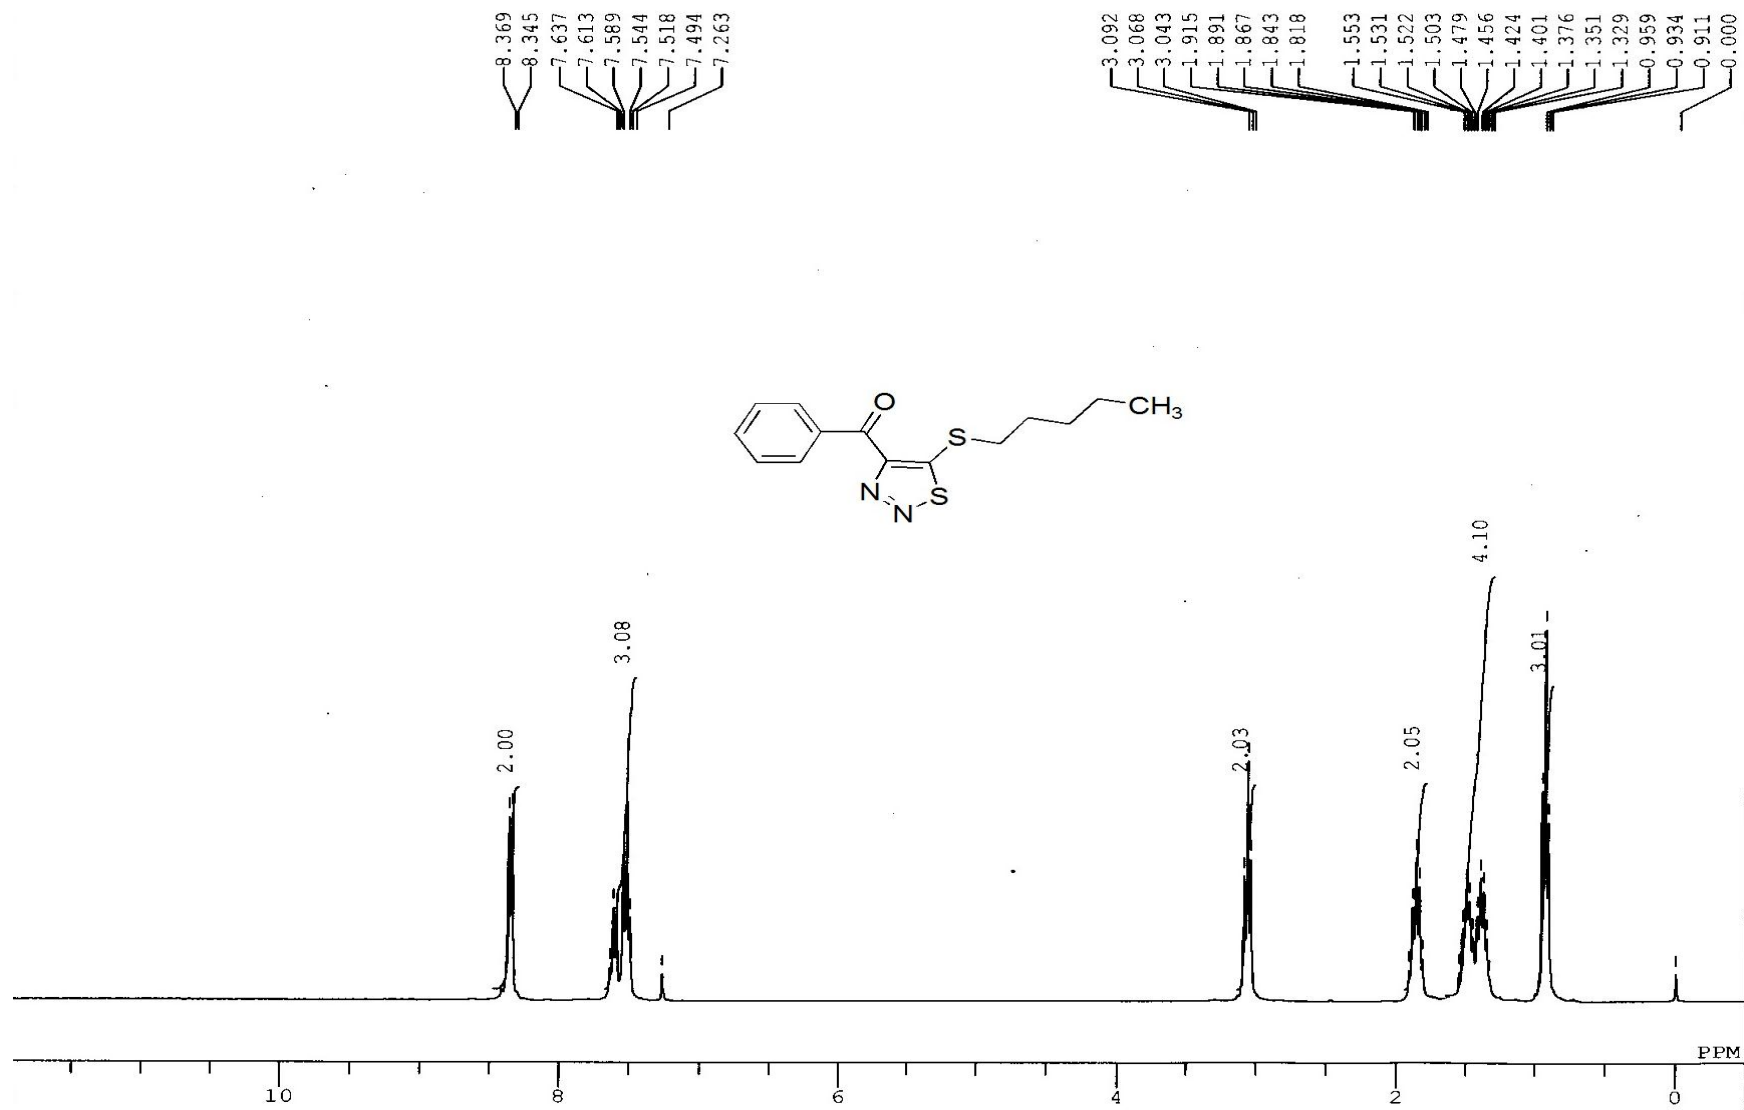

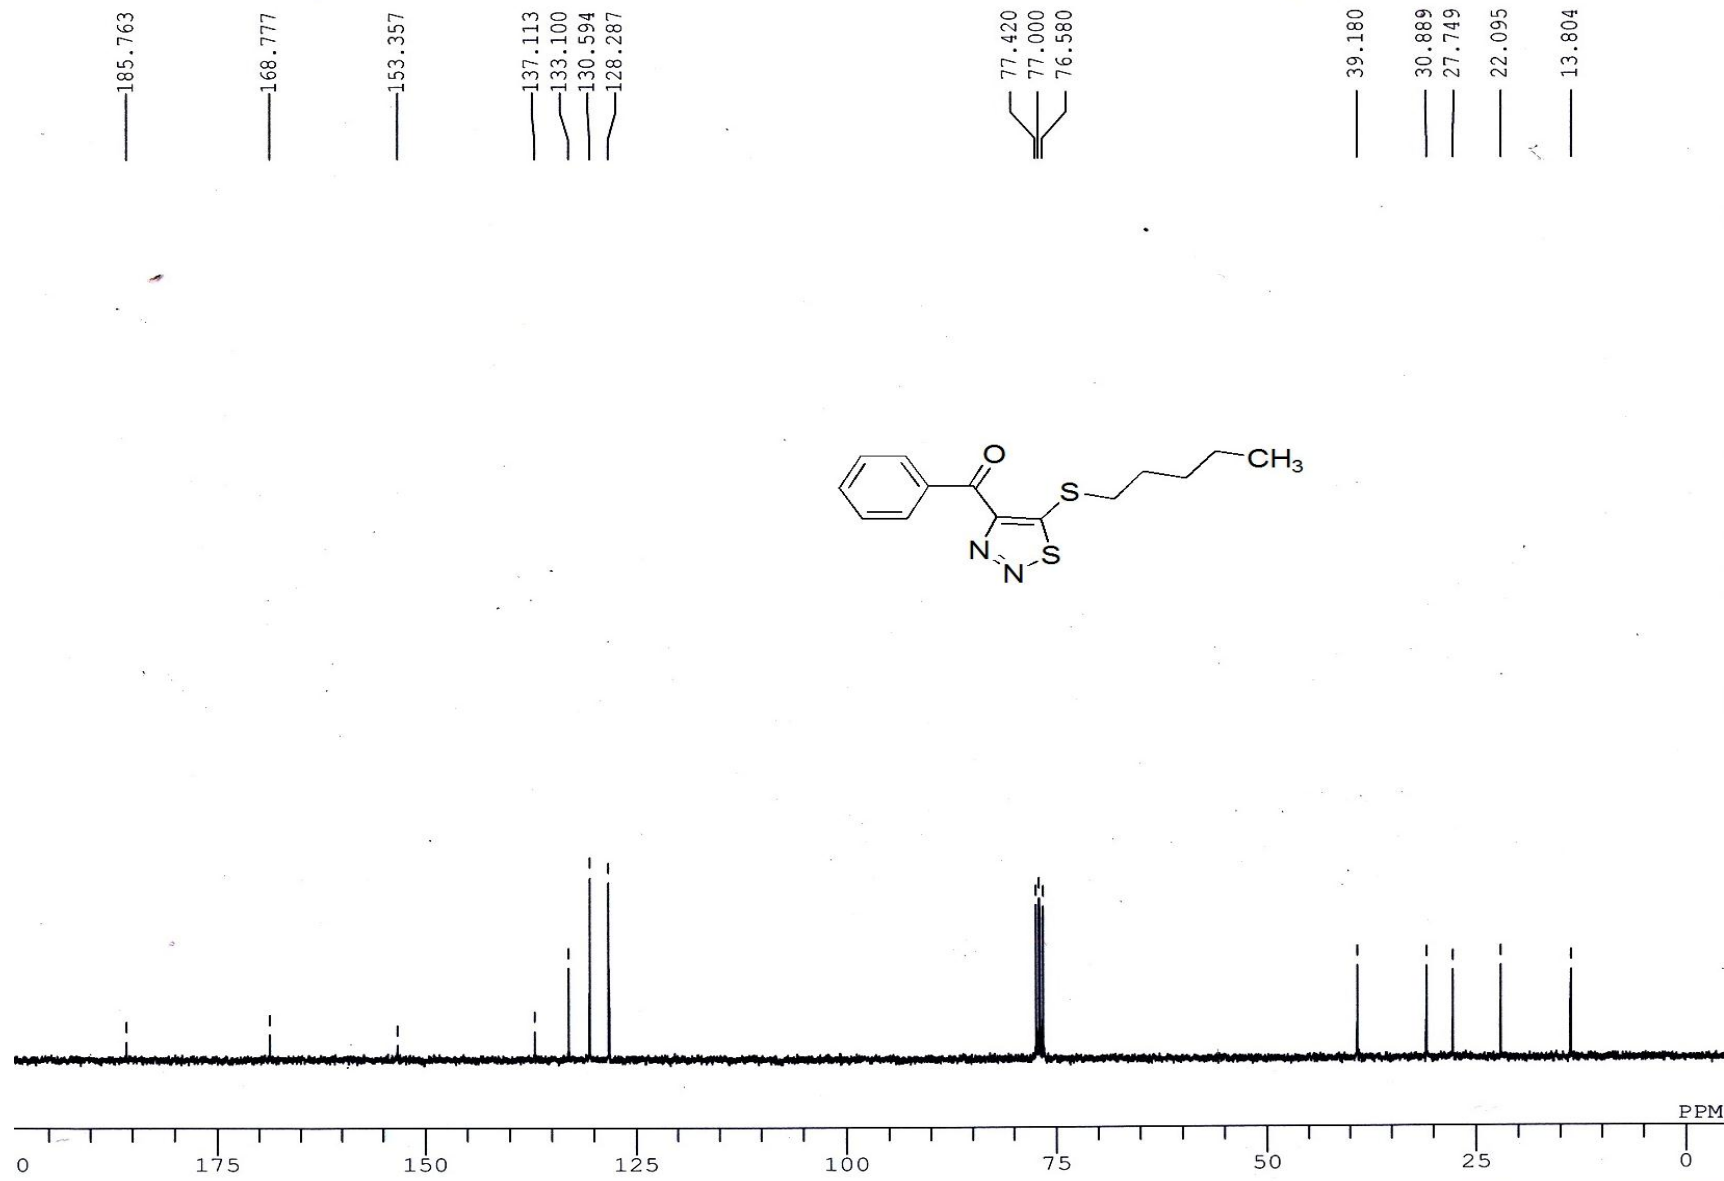

20)  $^1\text{H}$  &  $^{13}\text{C}$  NMR Spectra of 5-Allylsulfanyl-4-benzoyl-1,2,3-thiadiazole (3fa):

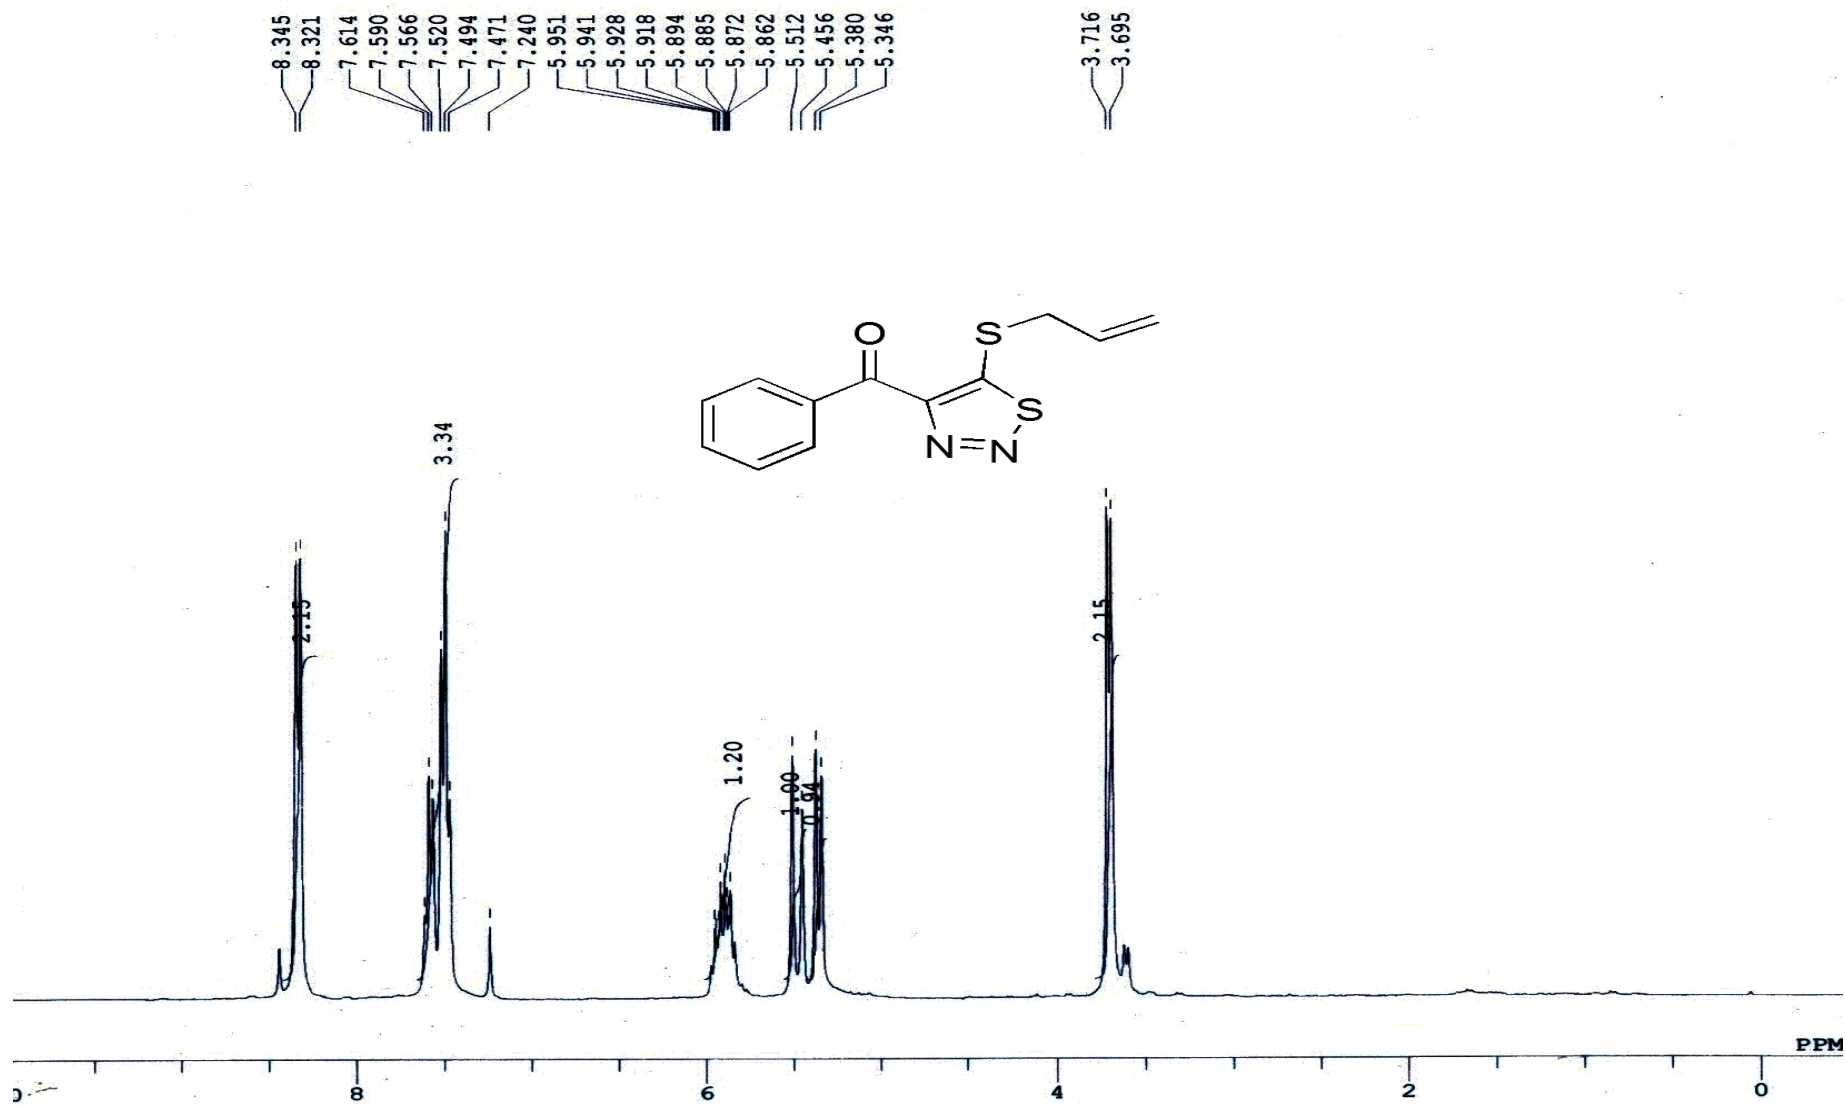



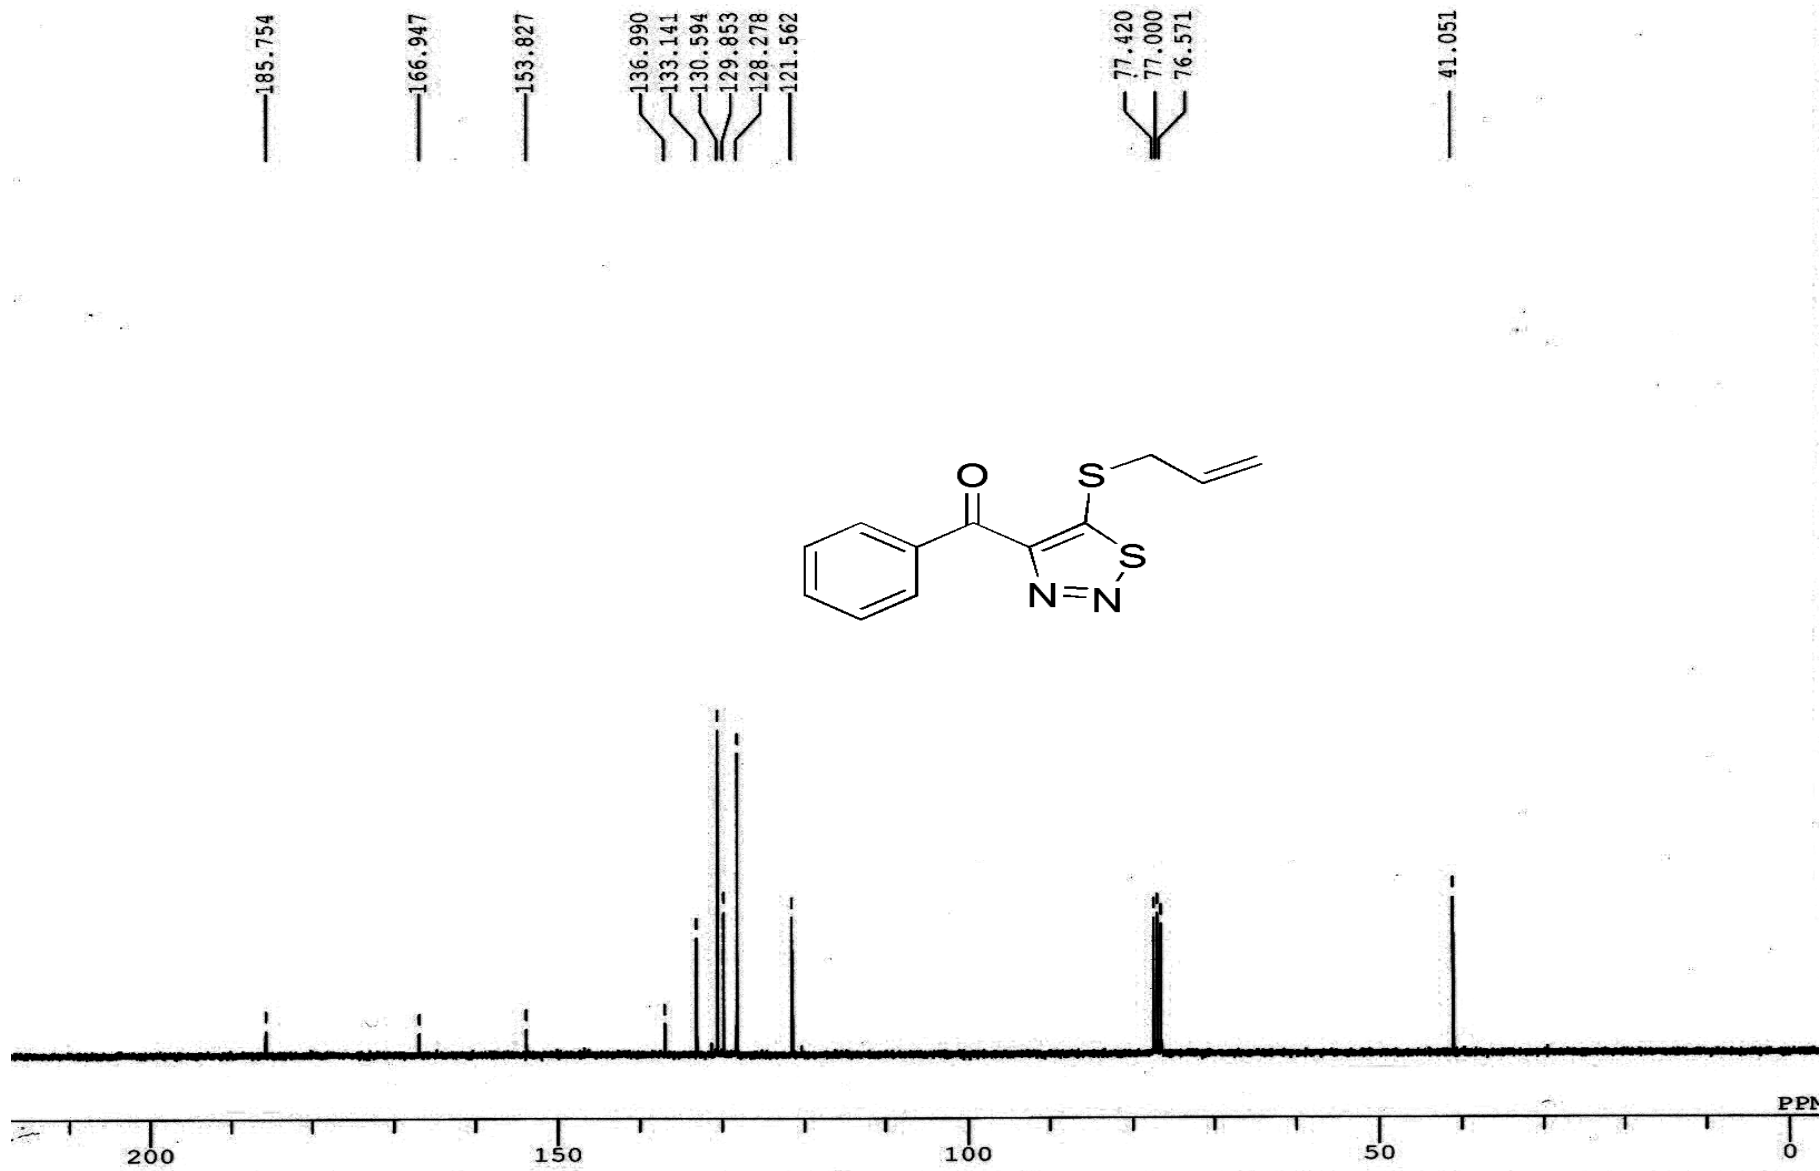

21)  $^1\text{H}$  &  $^{13}\text{C}$  NMR Spectra of 5-Allylsulfanyl-4-(4-methylbenzoyl)-1,2,3-thiadiazole (3fb):

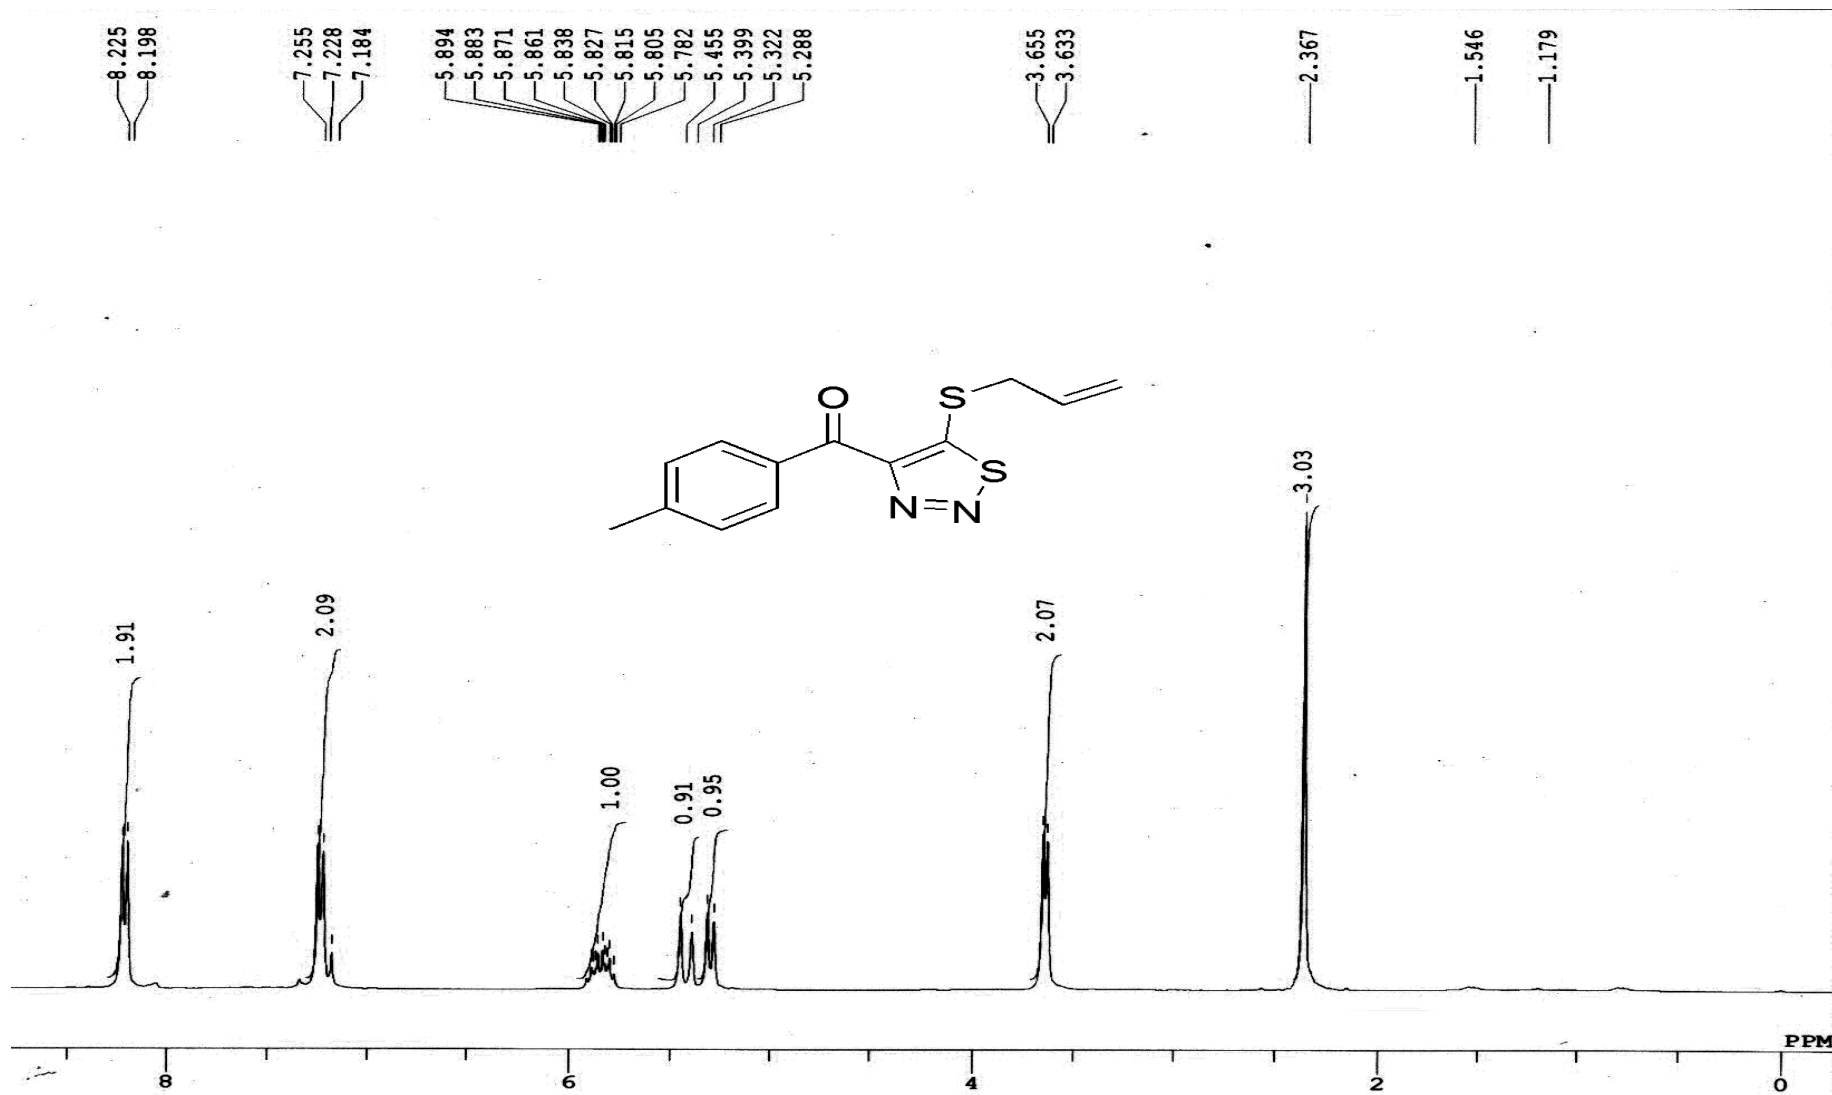

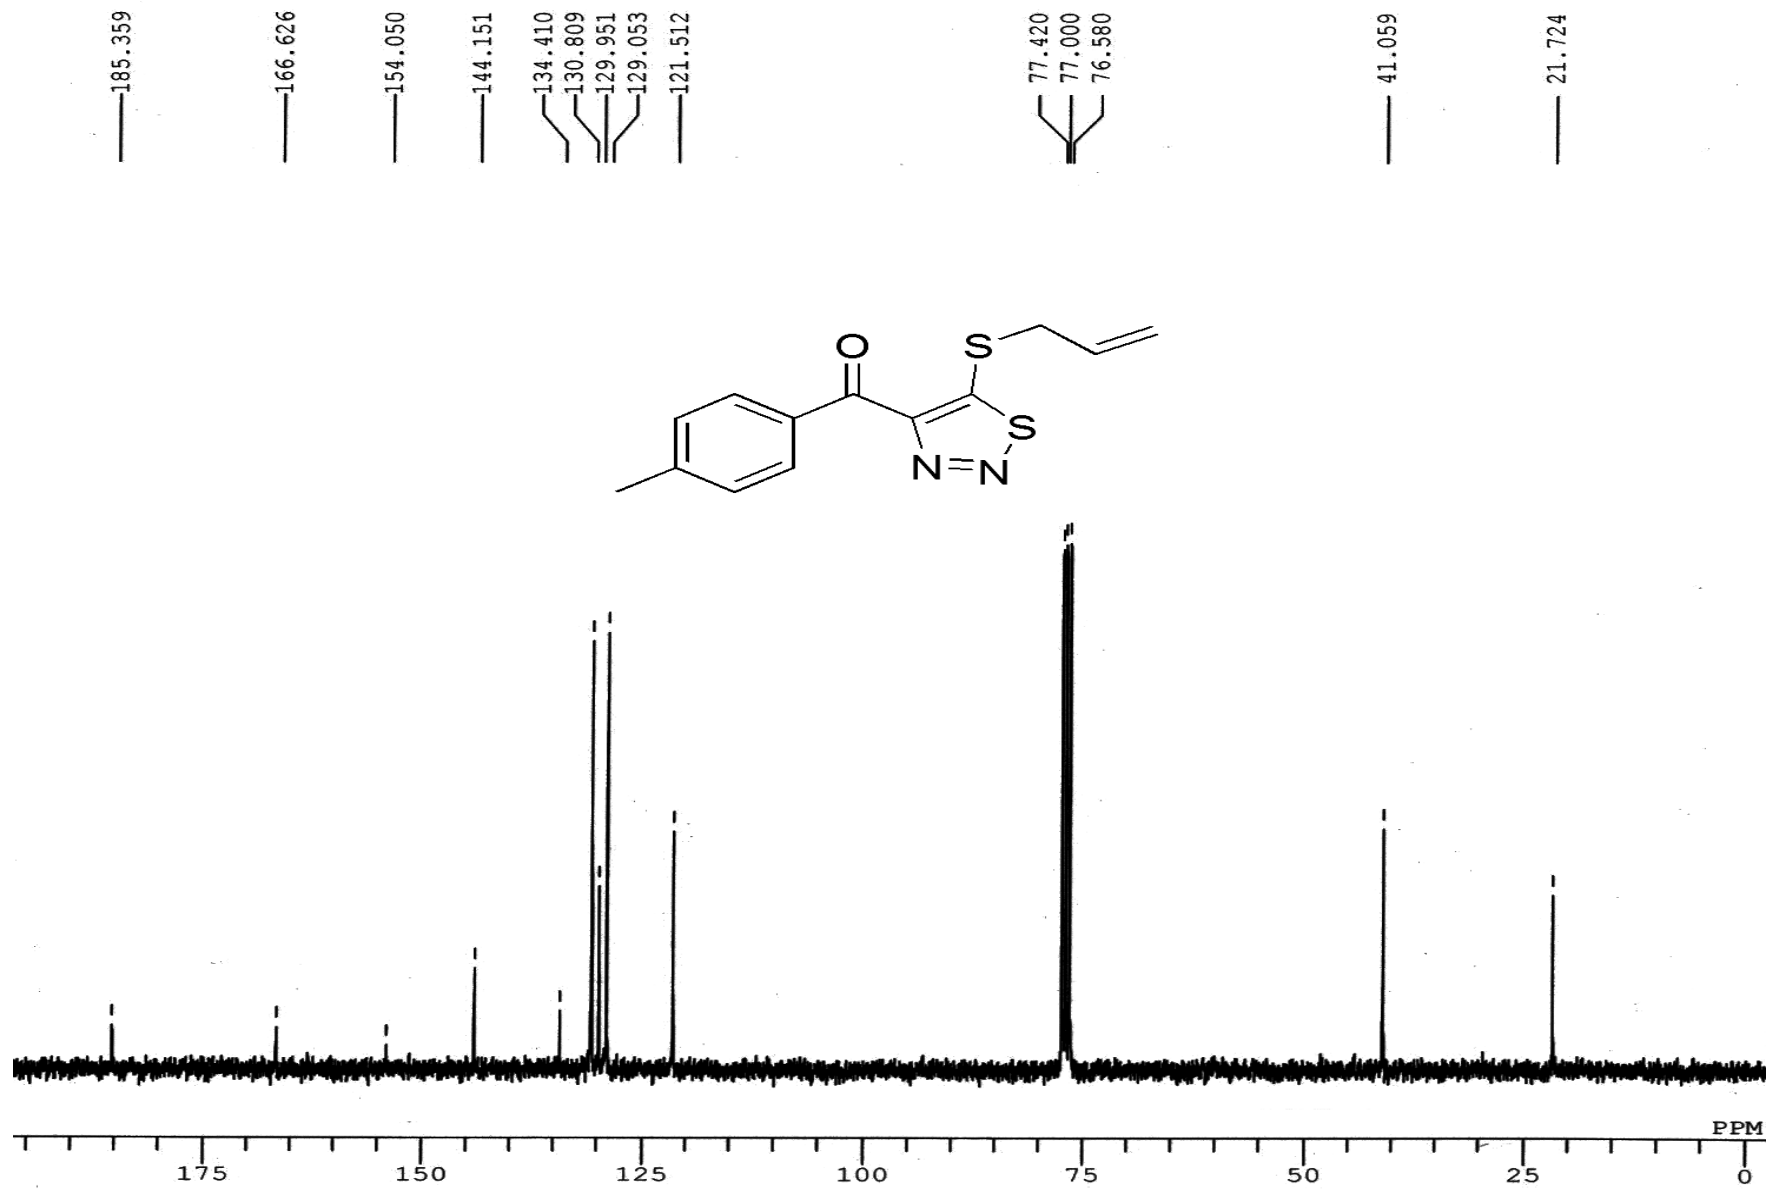

22)  $^1\text{H}$  &  $^{13}\text{C}$  NMR Spectra of 5-Allylsulfanyl-4-(4-methoxybenzoyl)-1,2,3-thiadiazole (3fd):

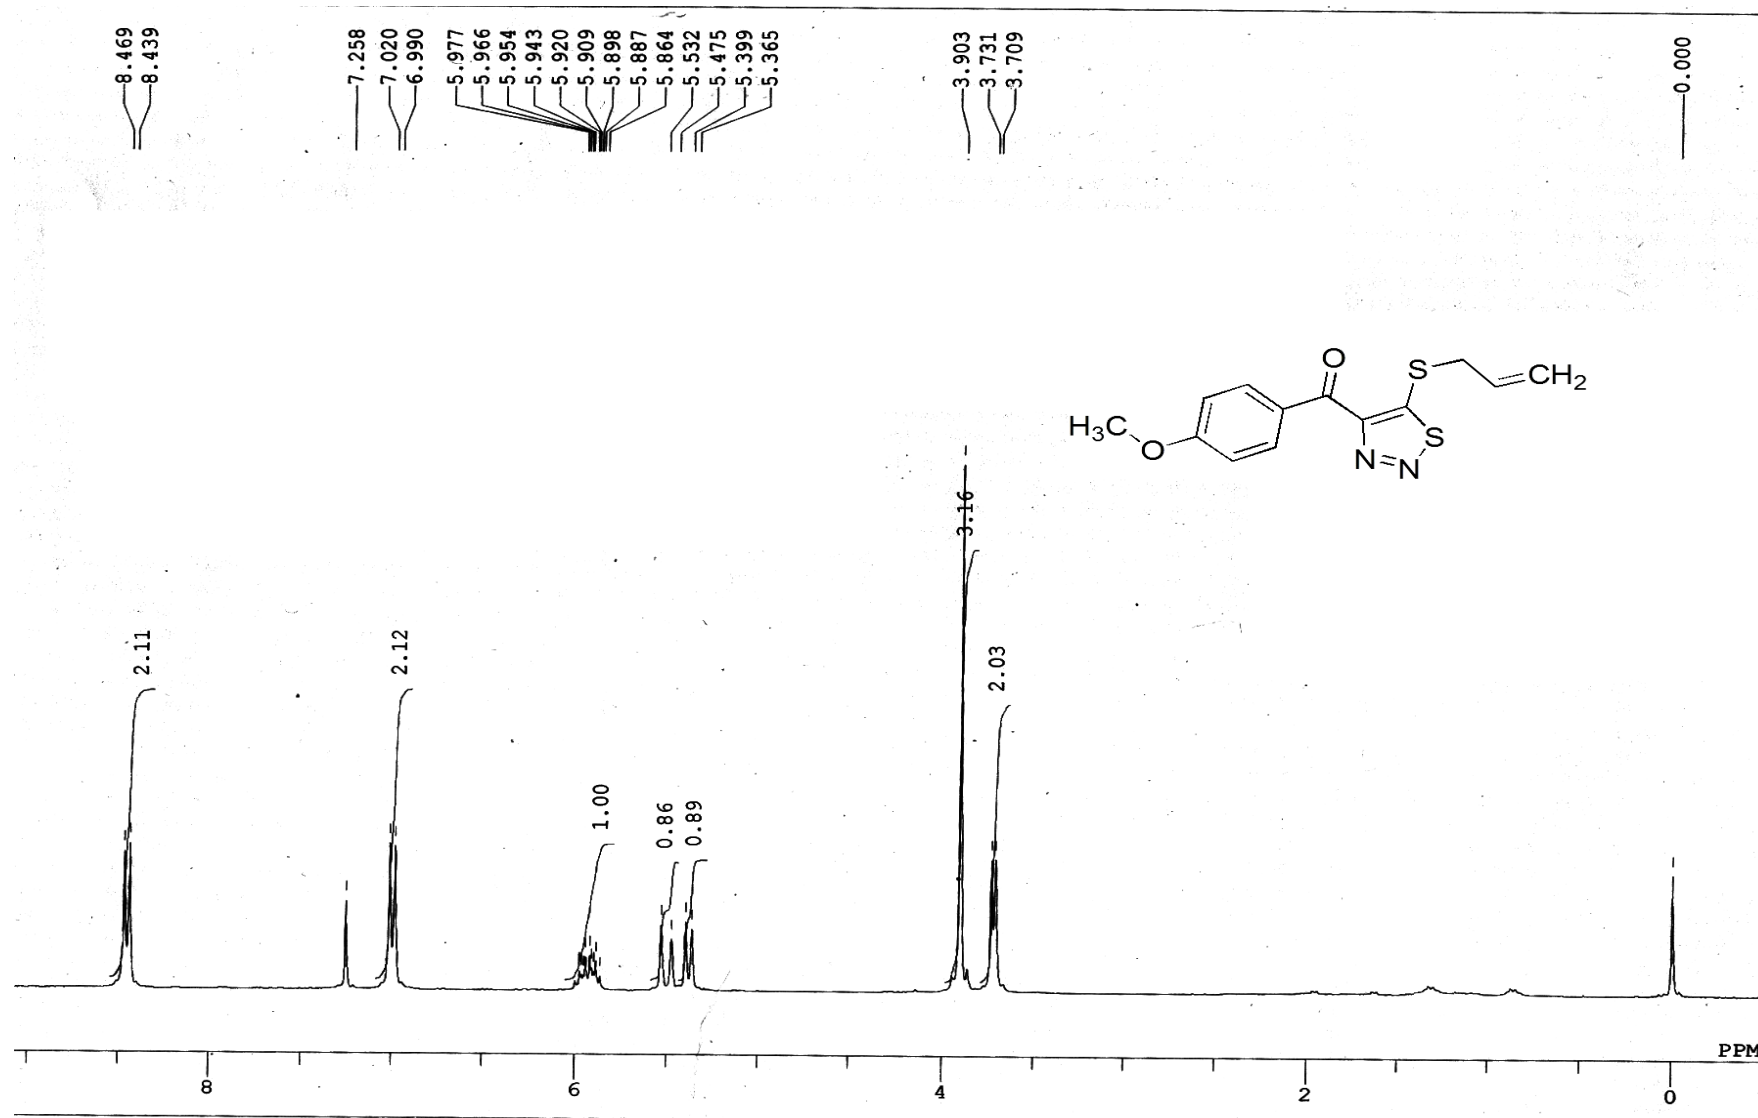

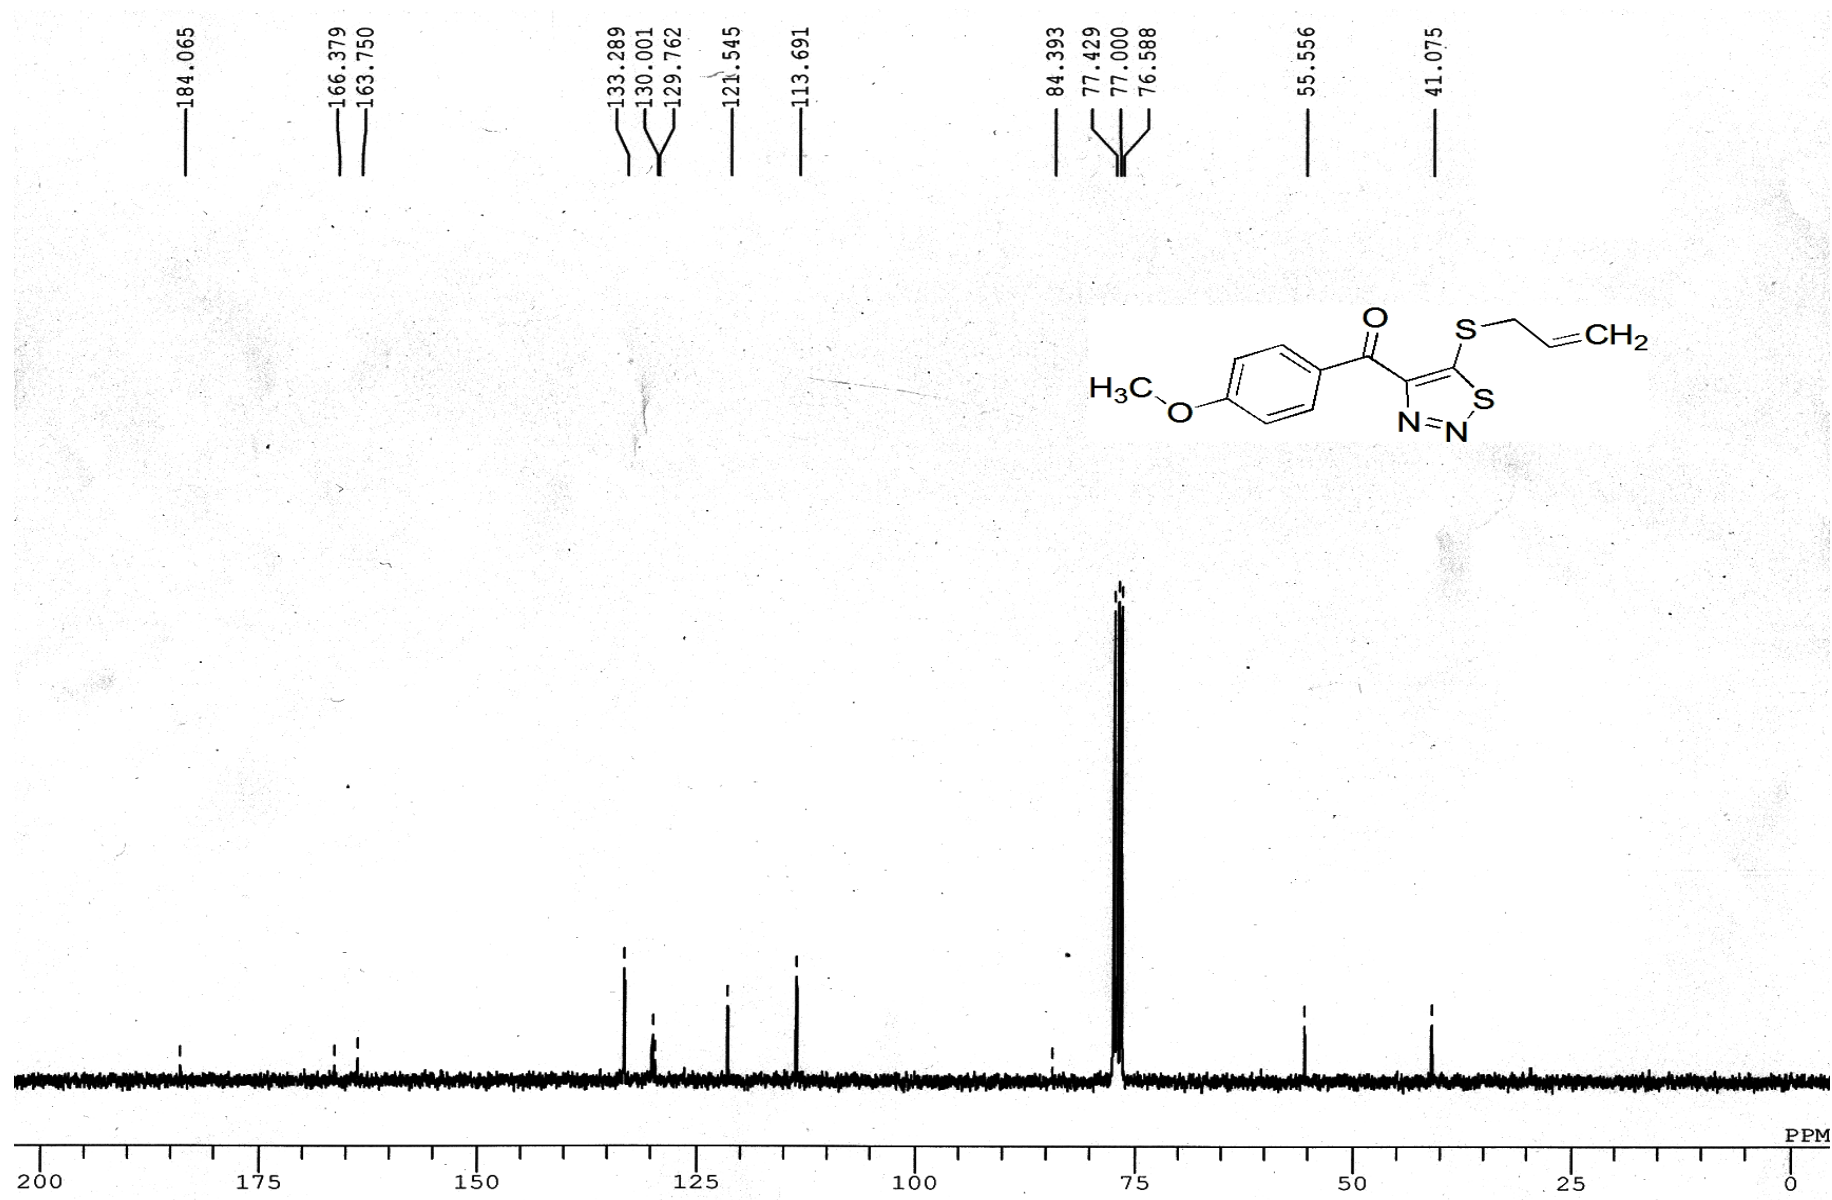

23)  $^1\text{H}$  &  $^{13}\text{C}$  NMR Spectra of 5-Allylsulfanyl-4-(1-naphthoyl)-1,2,3-thiadiazole (3fg):

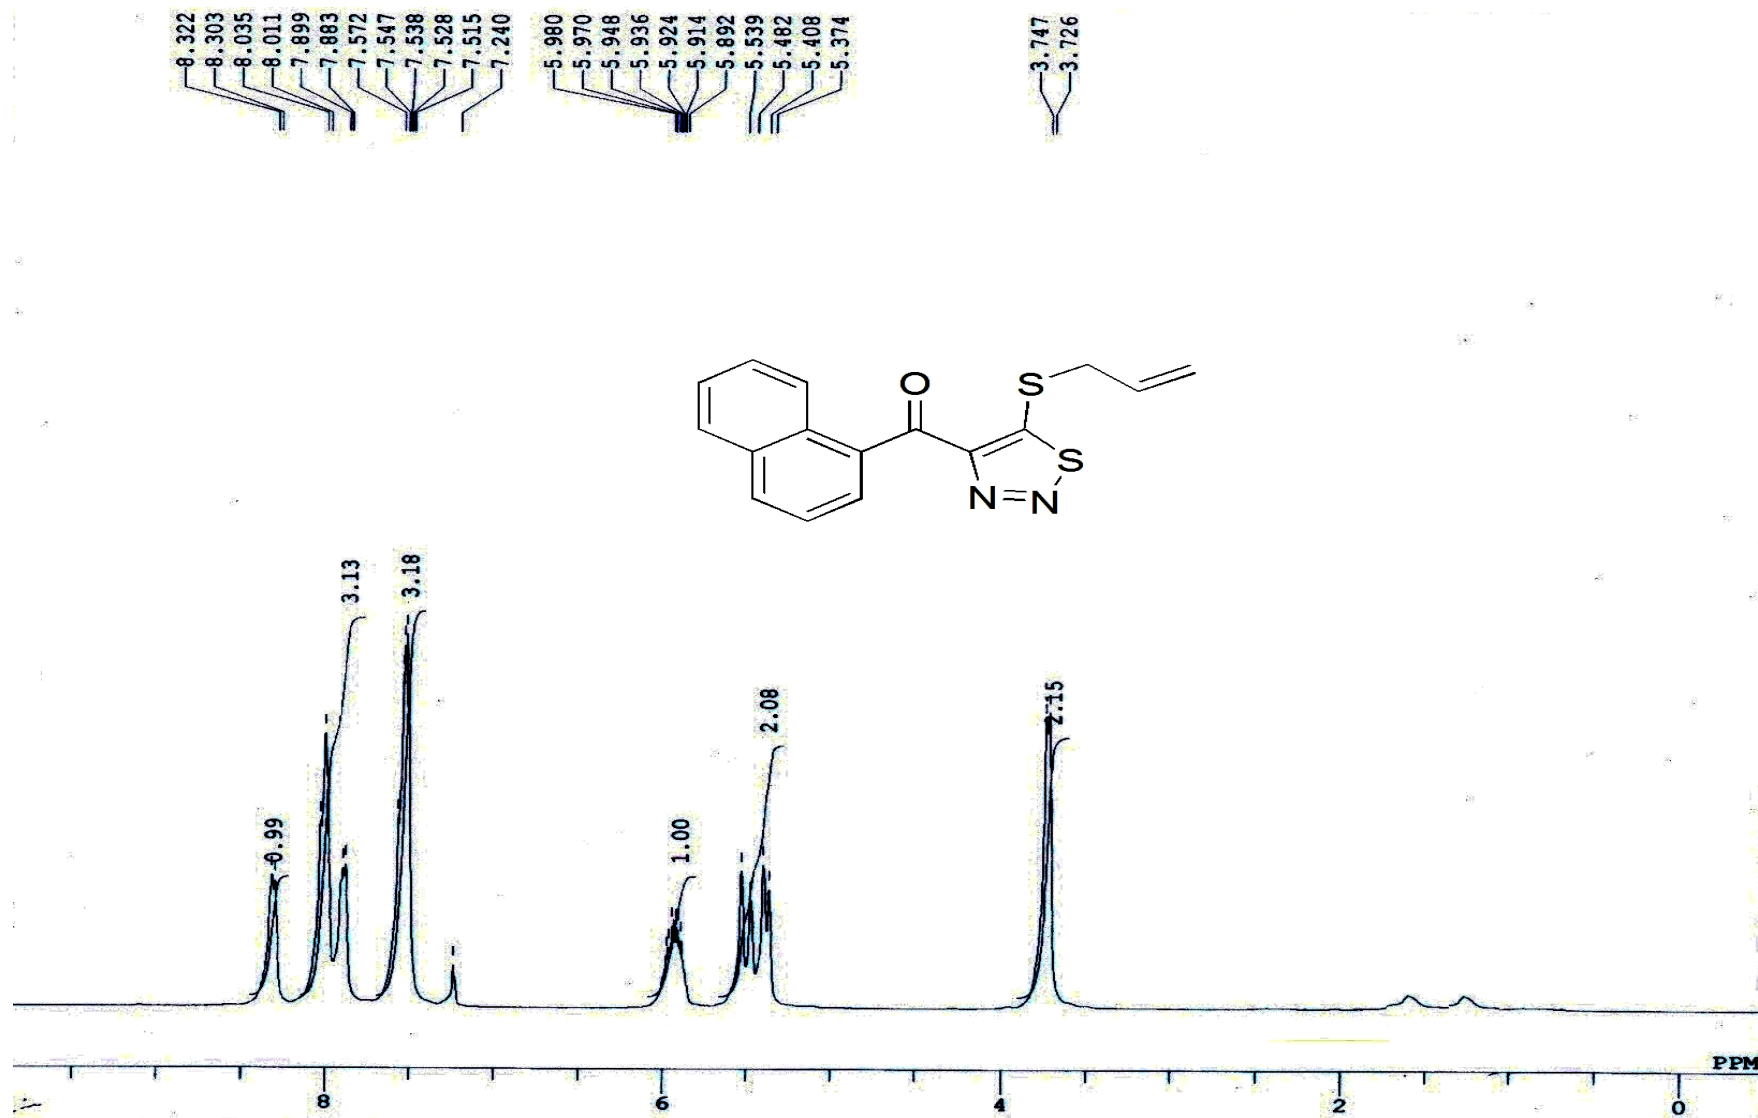

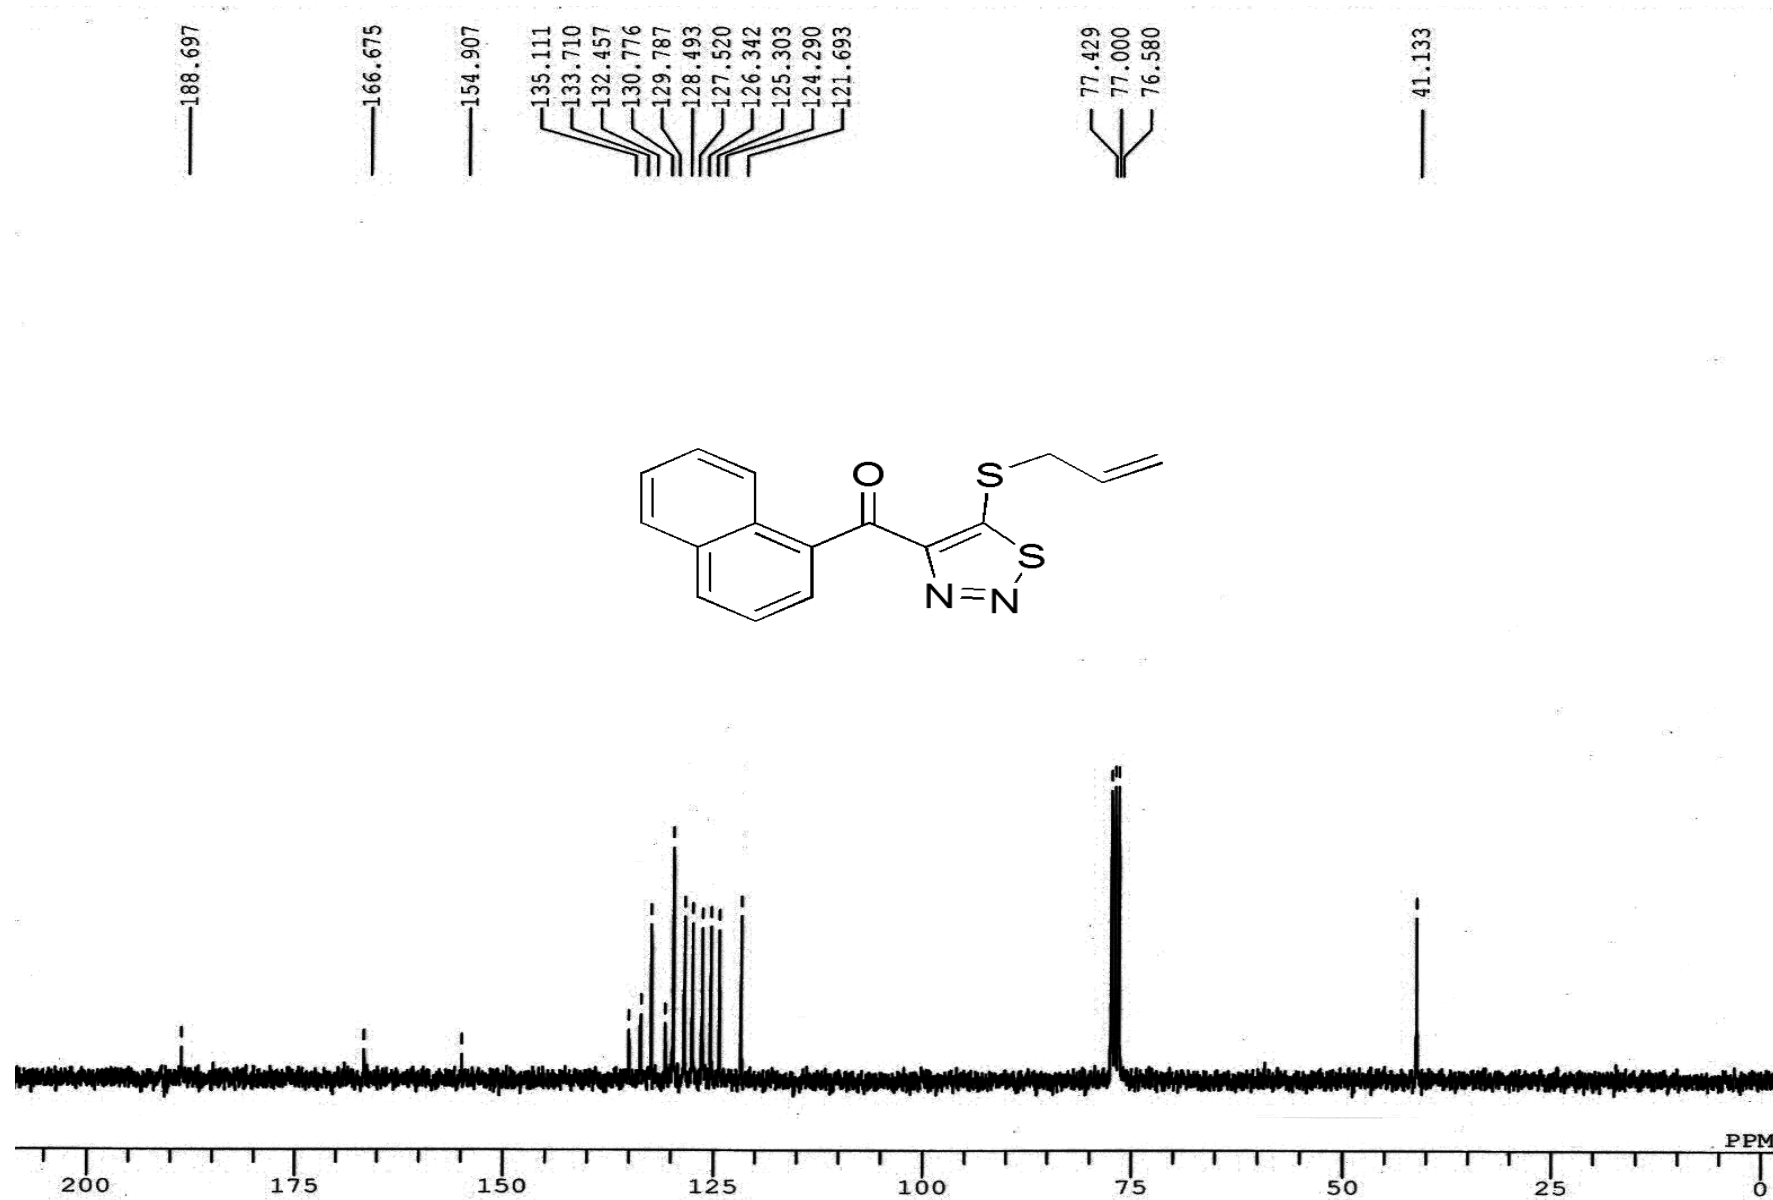

24)  $^1\text{H}$  &  $^{13}\text{C}$  NMR Spectra of 5-Allylsulfanyl-4-(2-furoyl)-[1,2,3]thiadiazole (3fe):

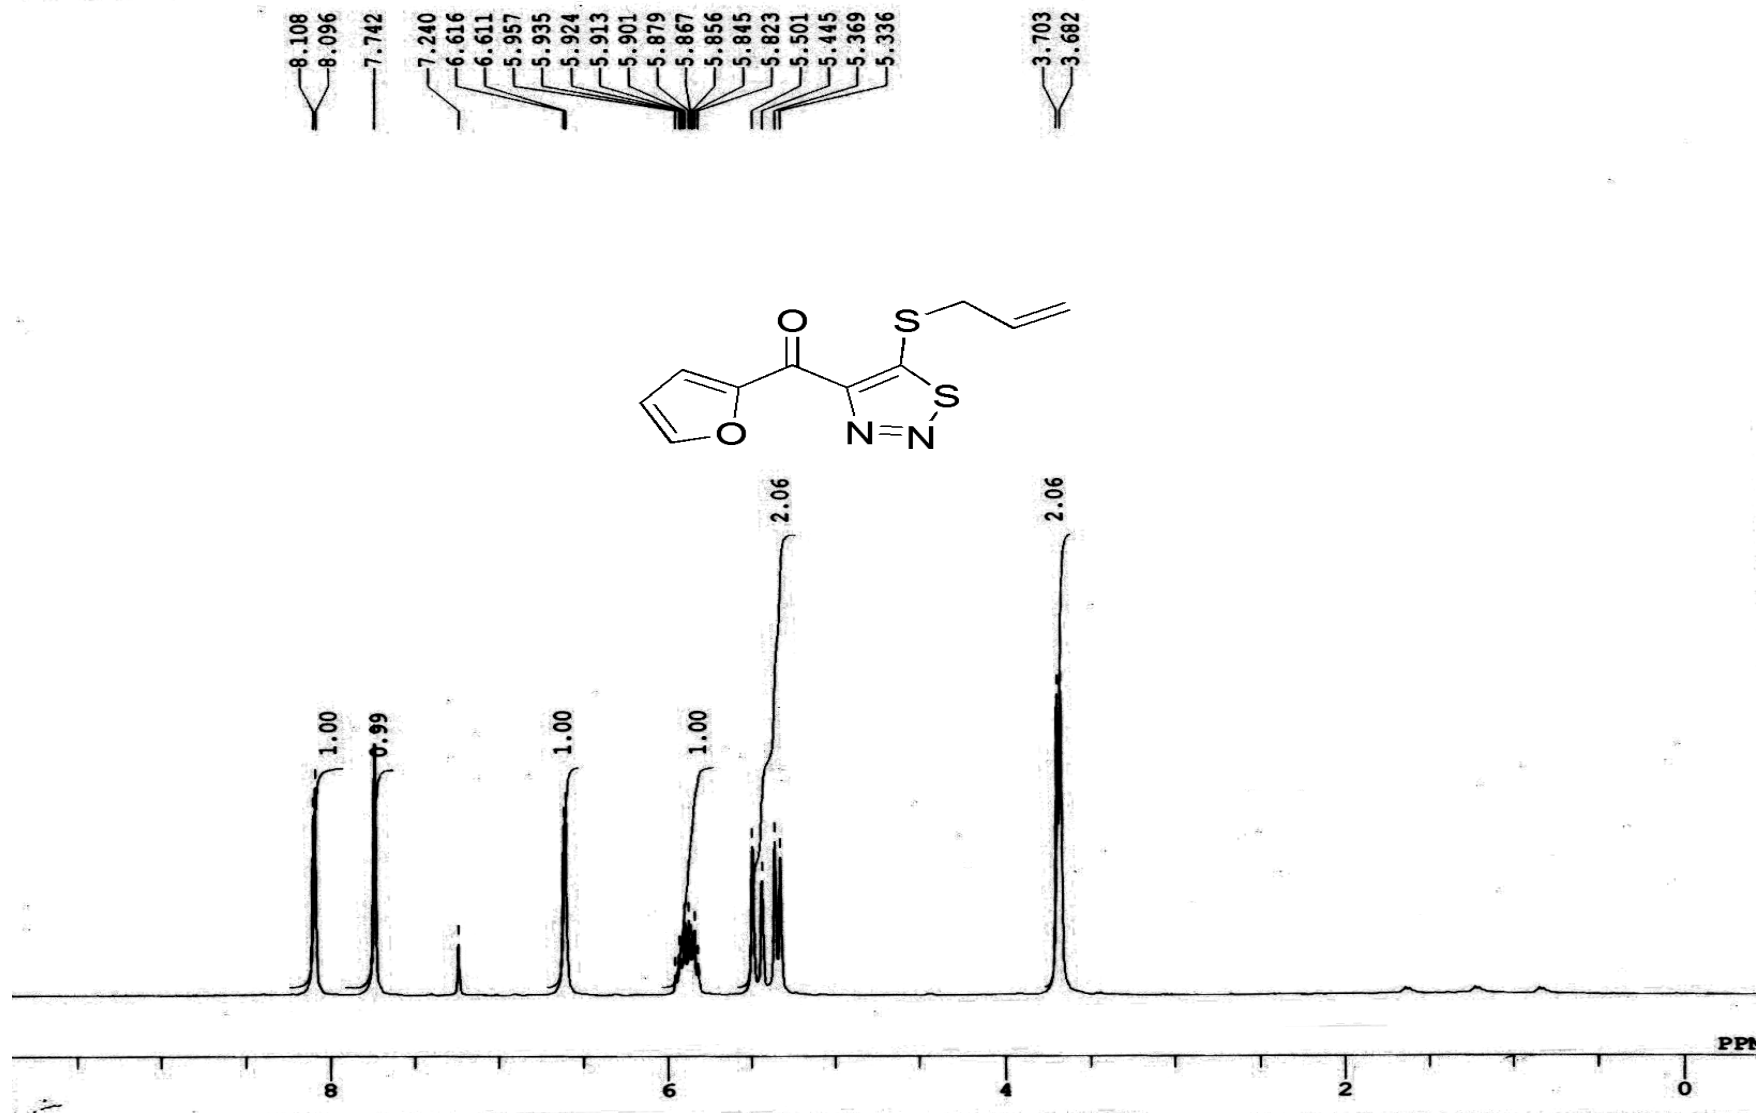



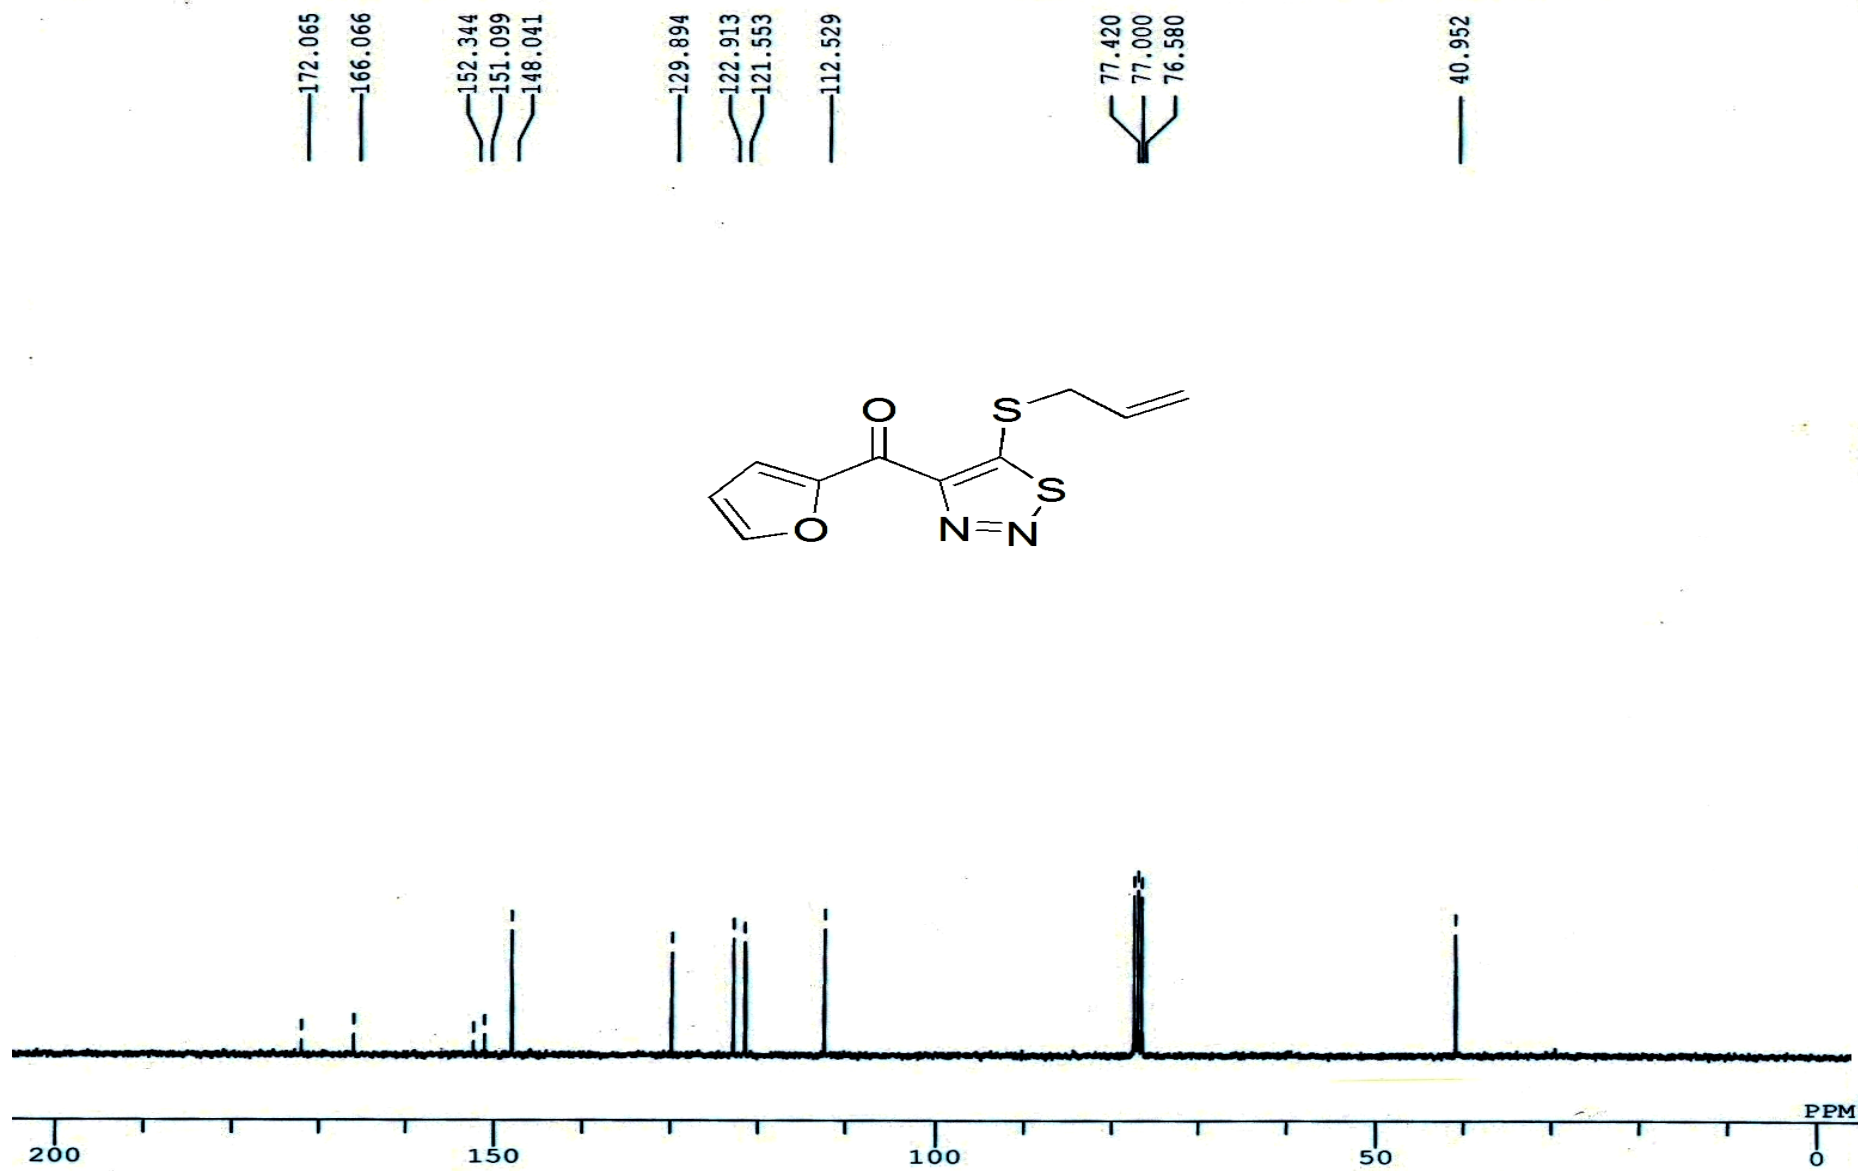

### 25) $^1\text{H}$ & $^{13}\text{C}$ NMR Spectra of 5-Allylsulfanyl-4-(2-thienoyl)-1,2,3-thiadiazole (3ff):

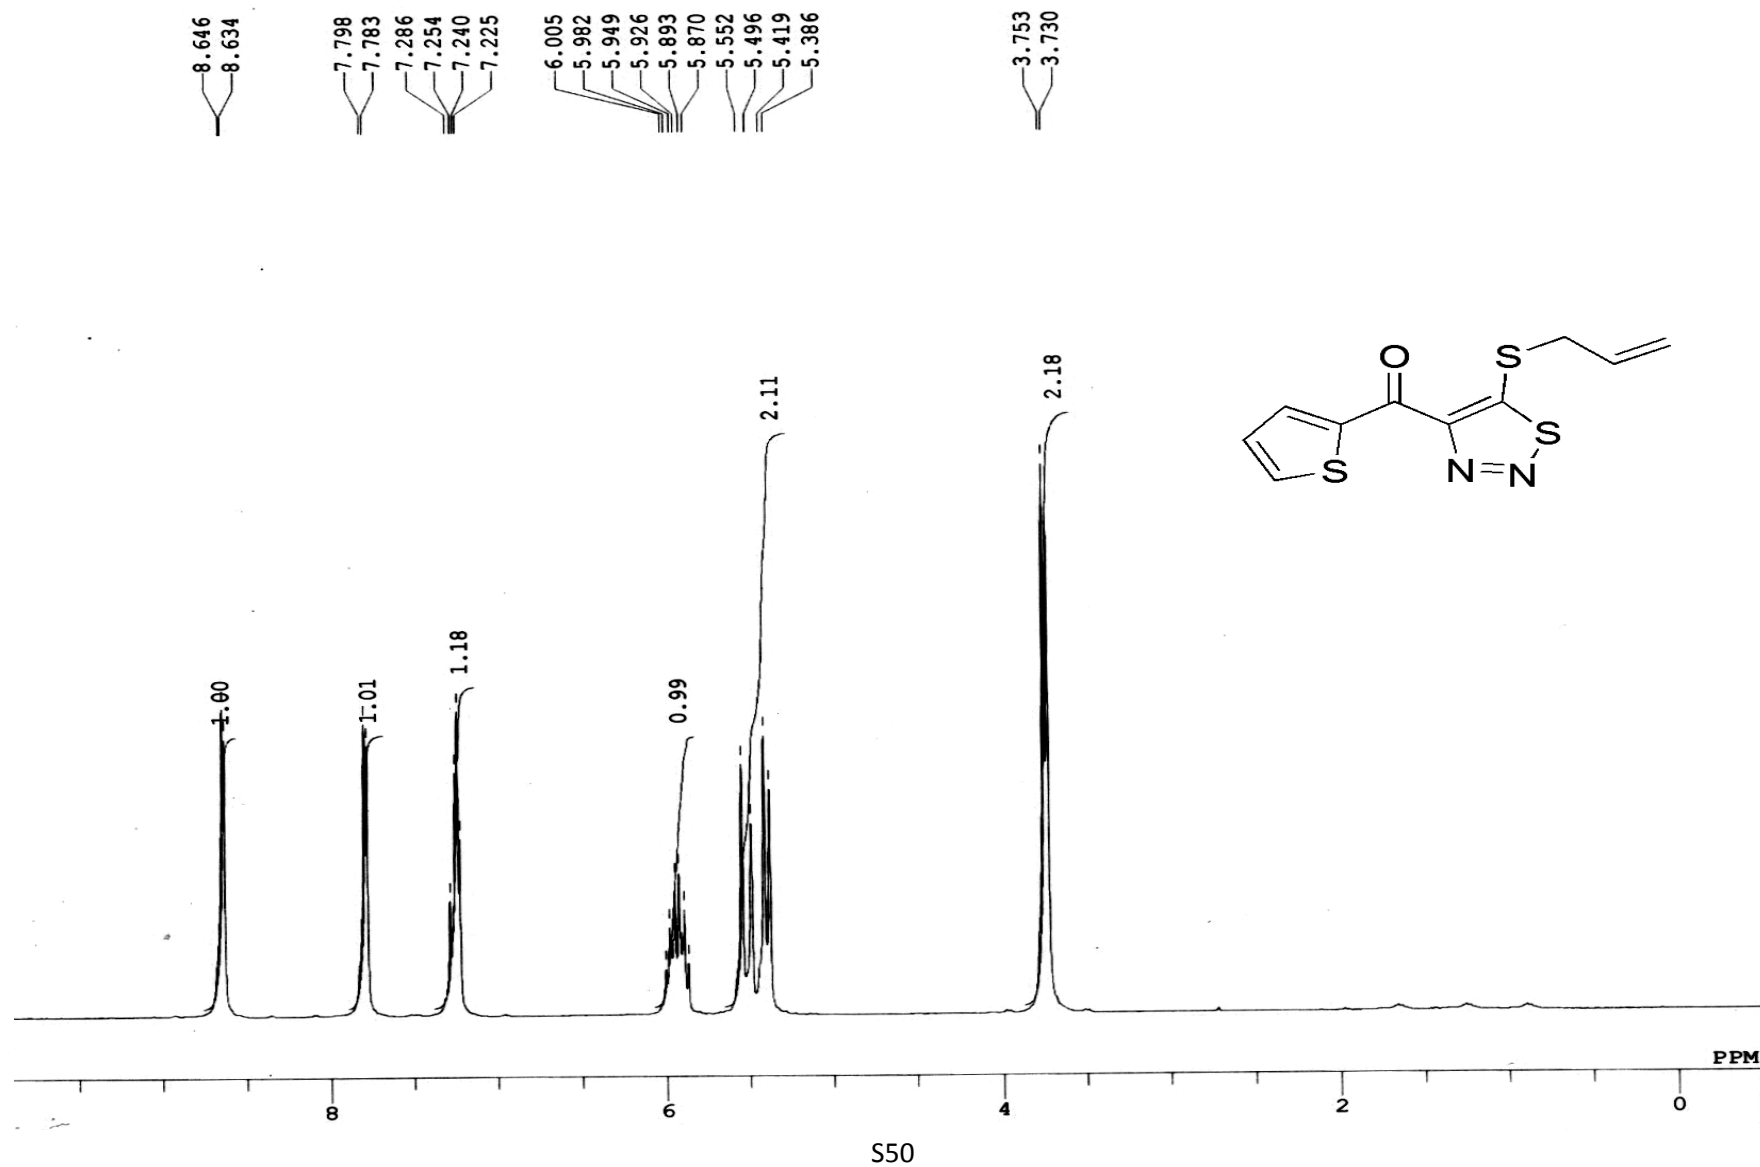

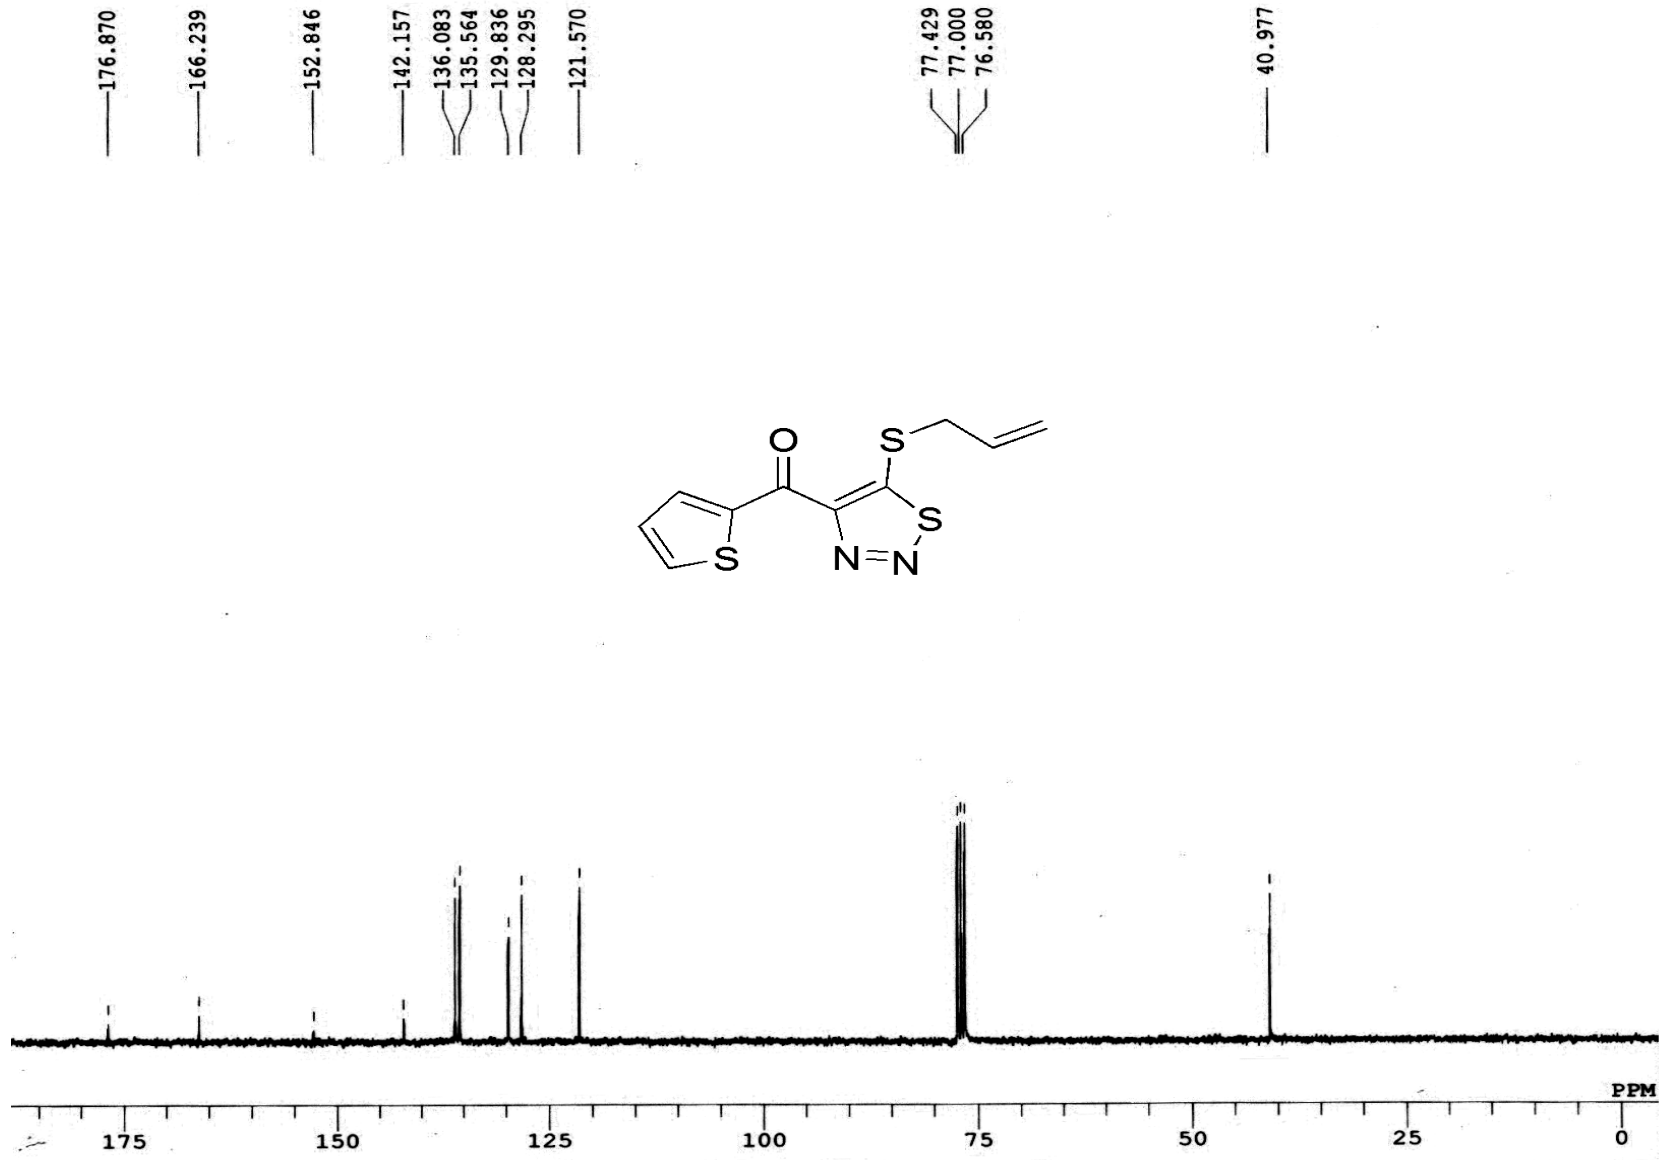

**26)  $^1\text{H}$  &  $^{13}\text{C}$  NMR Spectra of 5-Allylsulfanyl-4-(2-methyl-propan-1-oyl)-1,2,3-thiadiazole (3fo):**

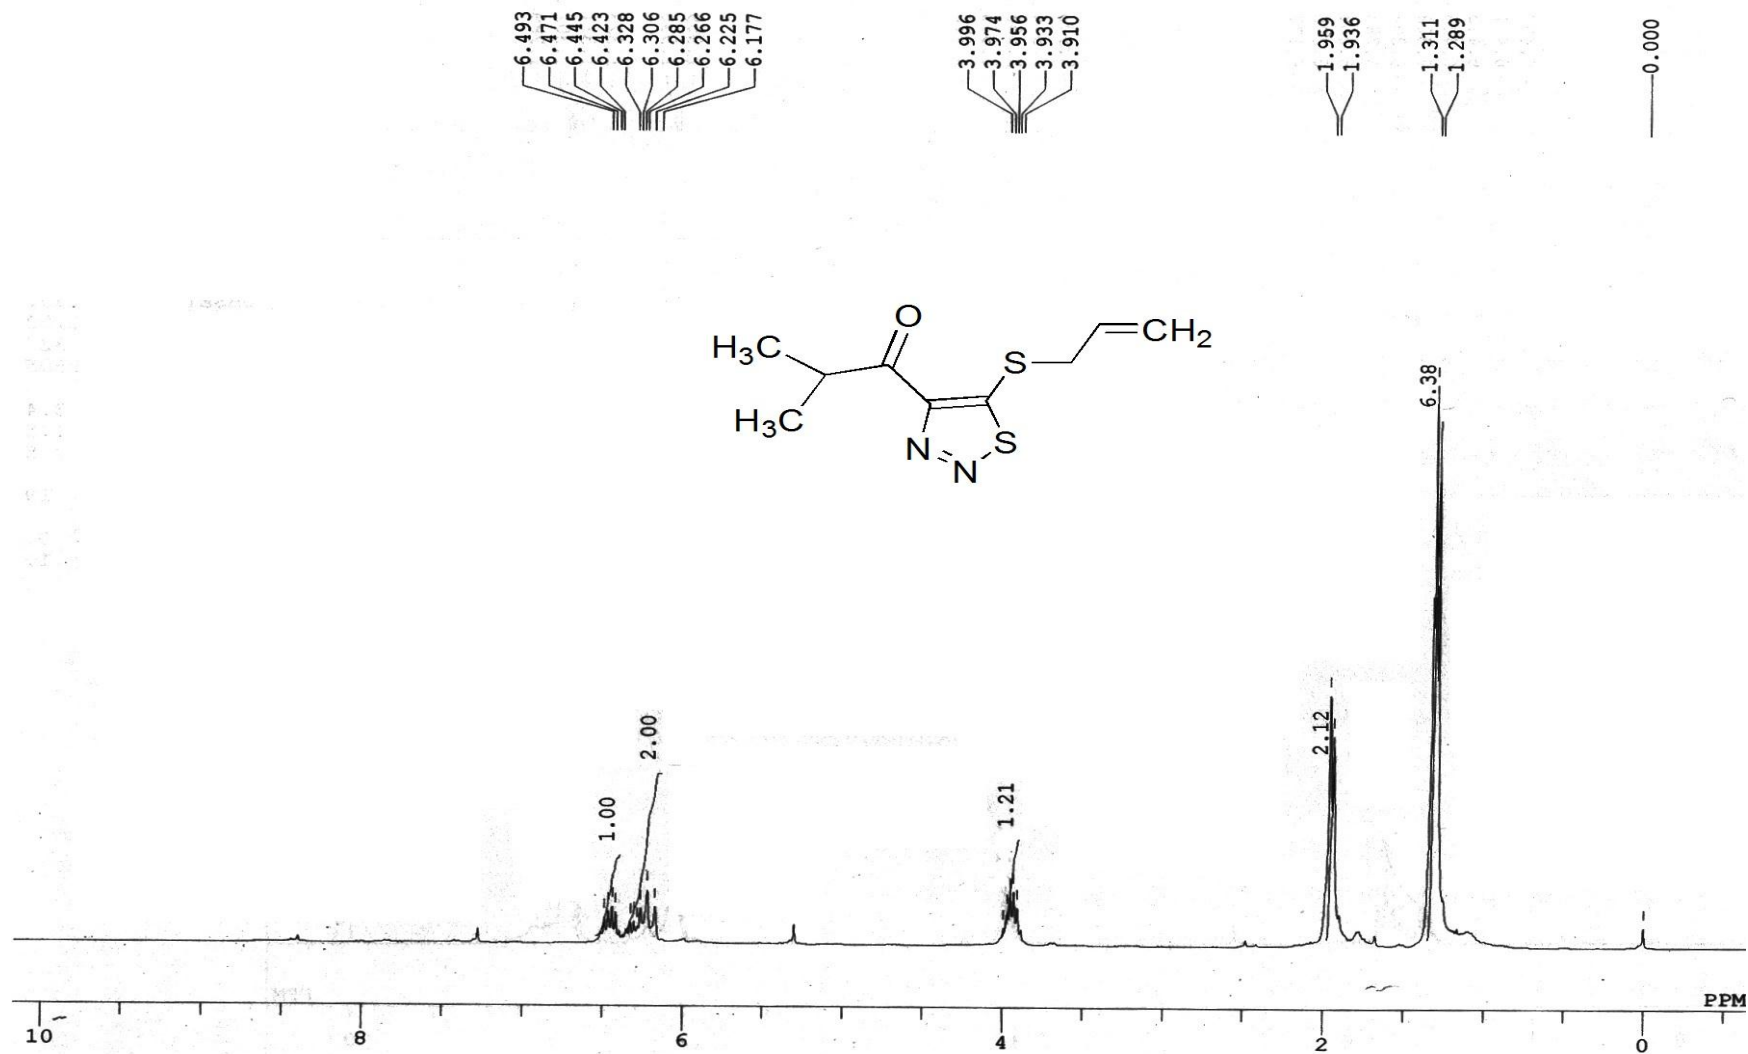

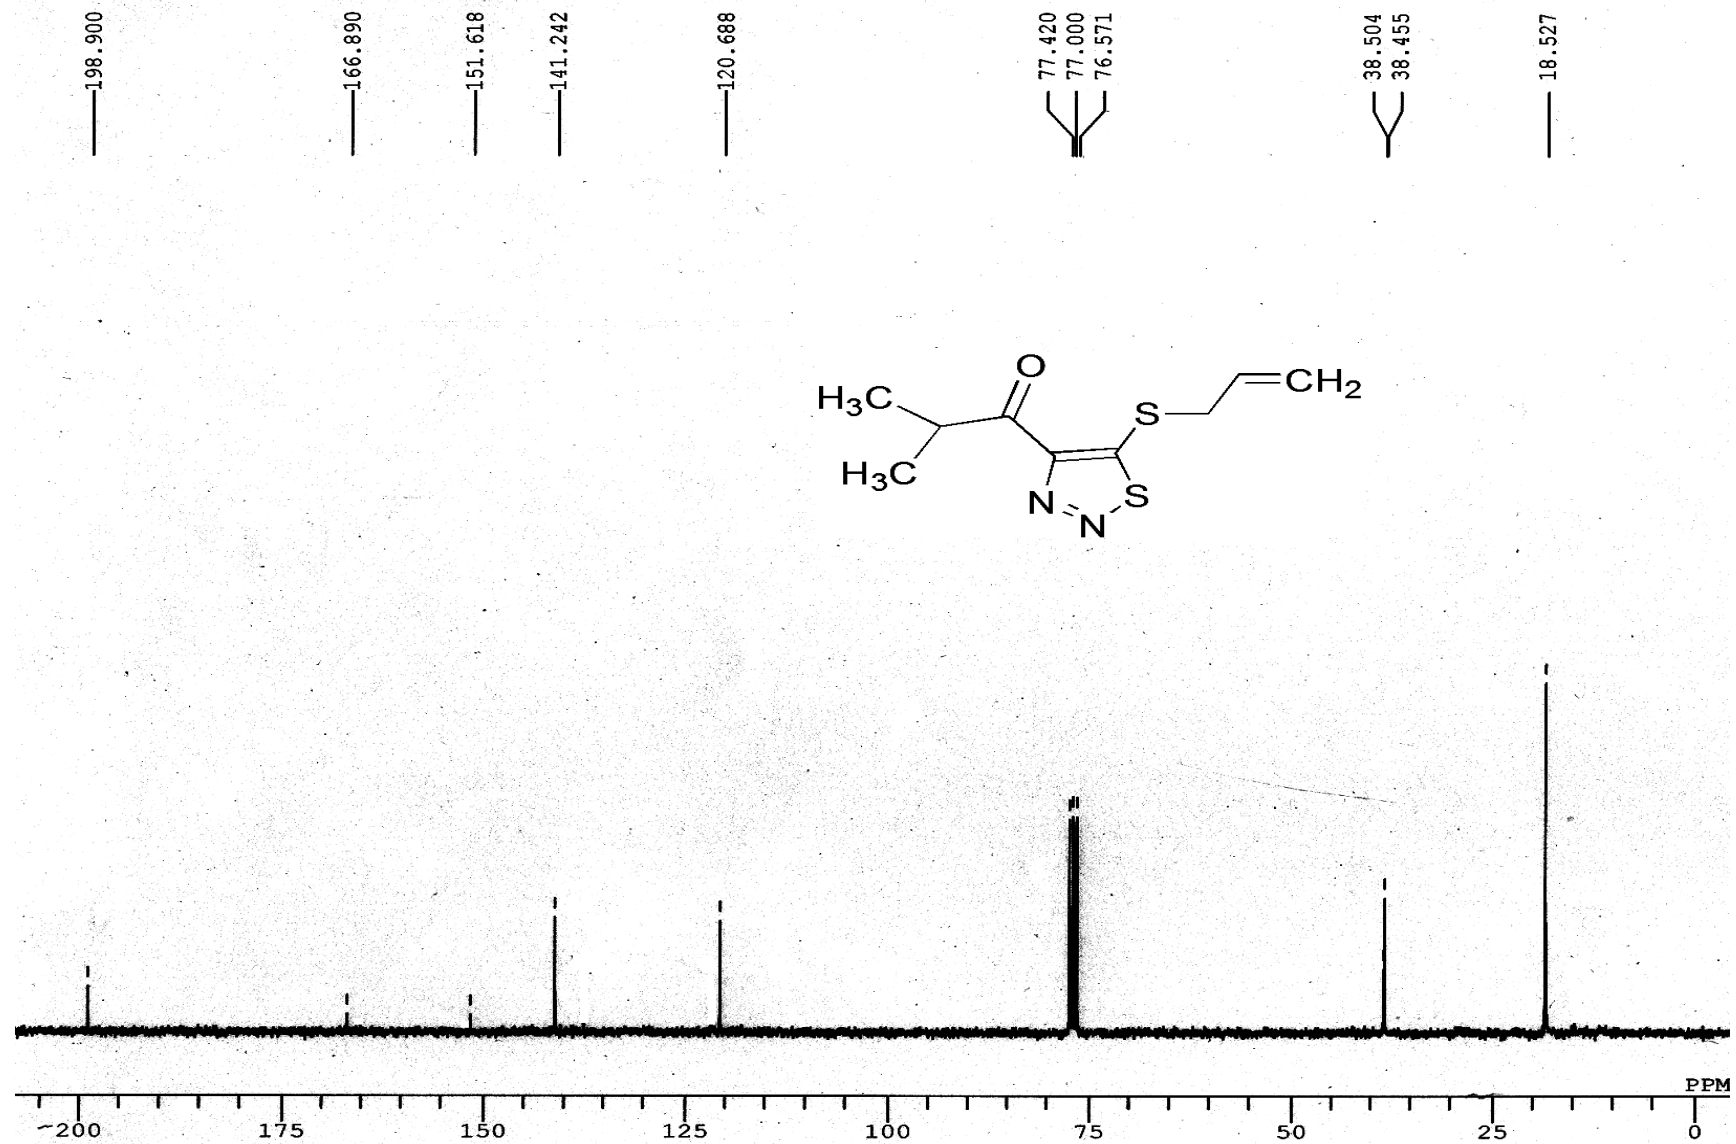

S53

**27)  $^1\text{H}$  &  $^{13}\text{C}$  NMR Spectra of 4-Benzoyl-5-benzylsulfanyl-1,2,3-thiadiazole (3ga):**

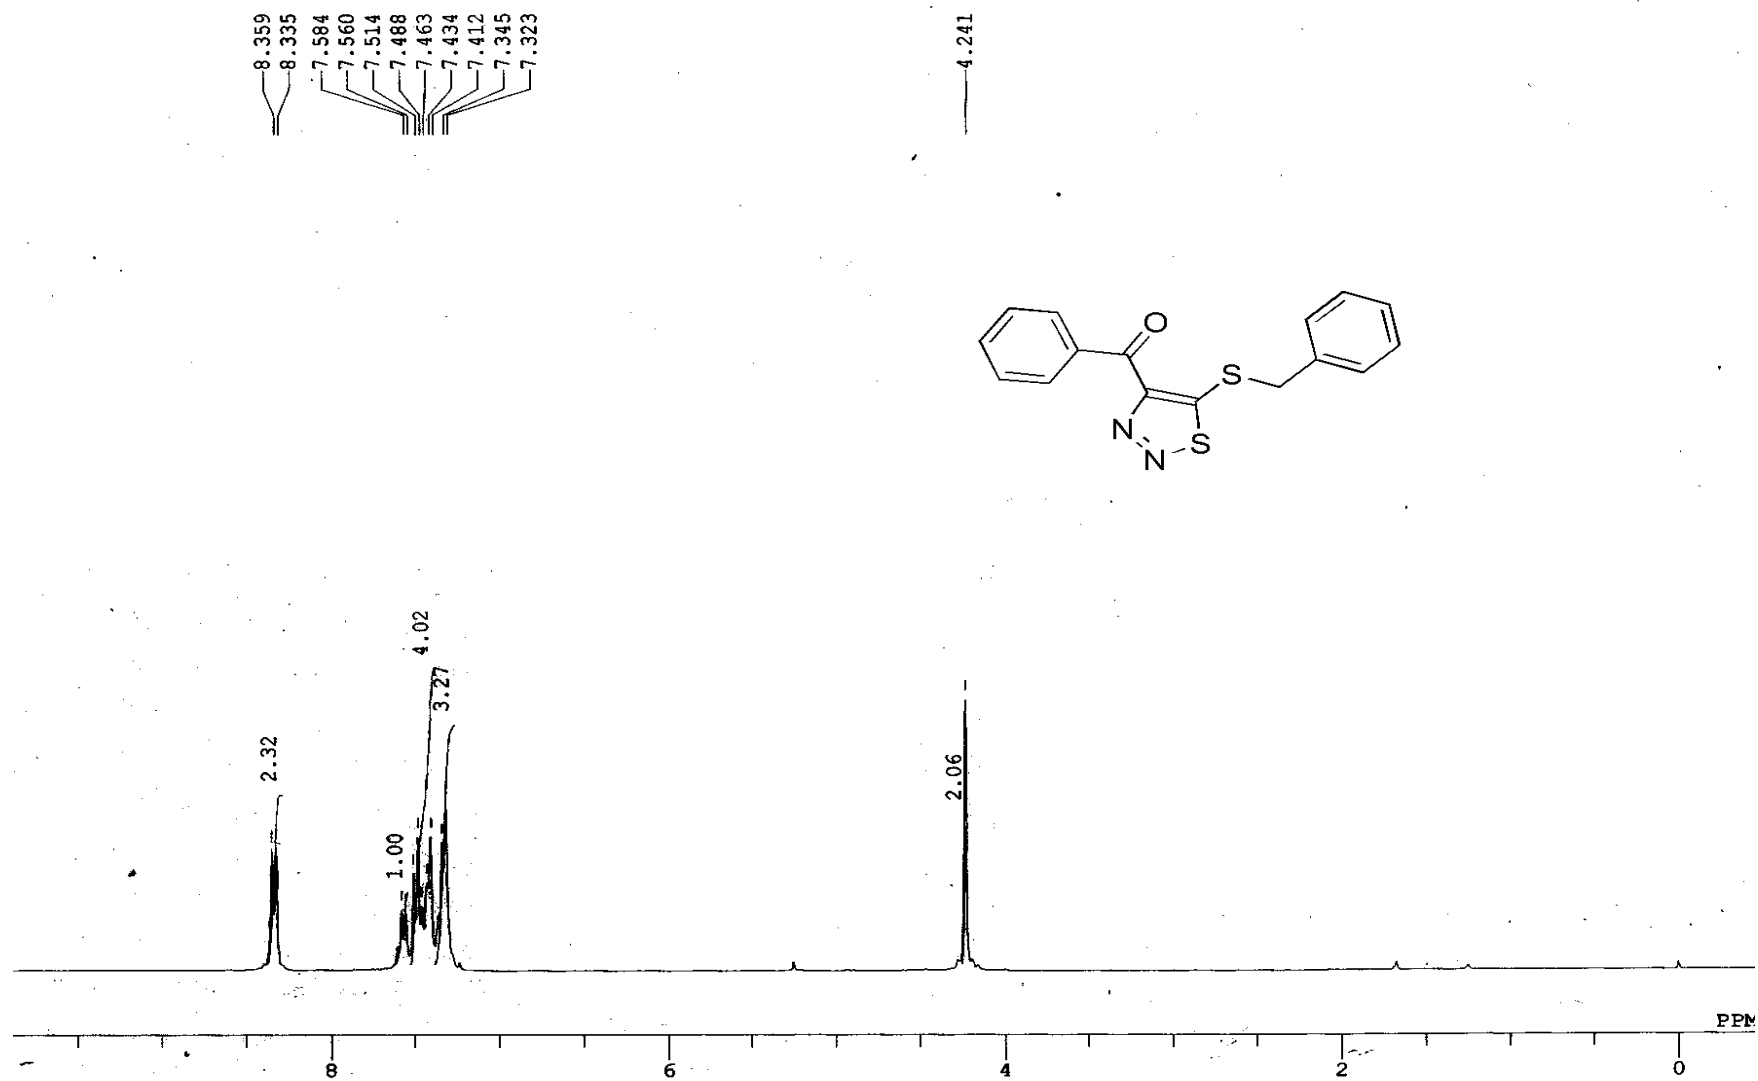

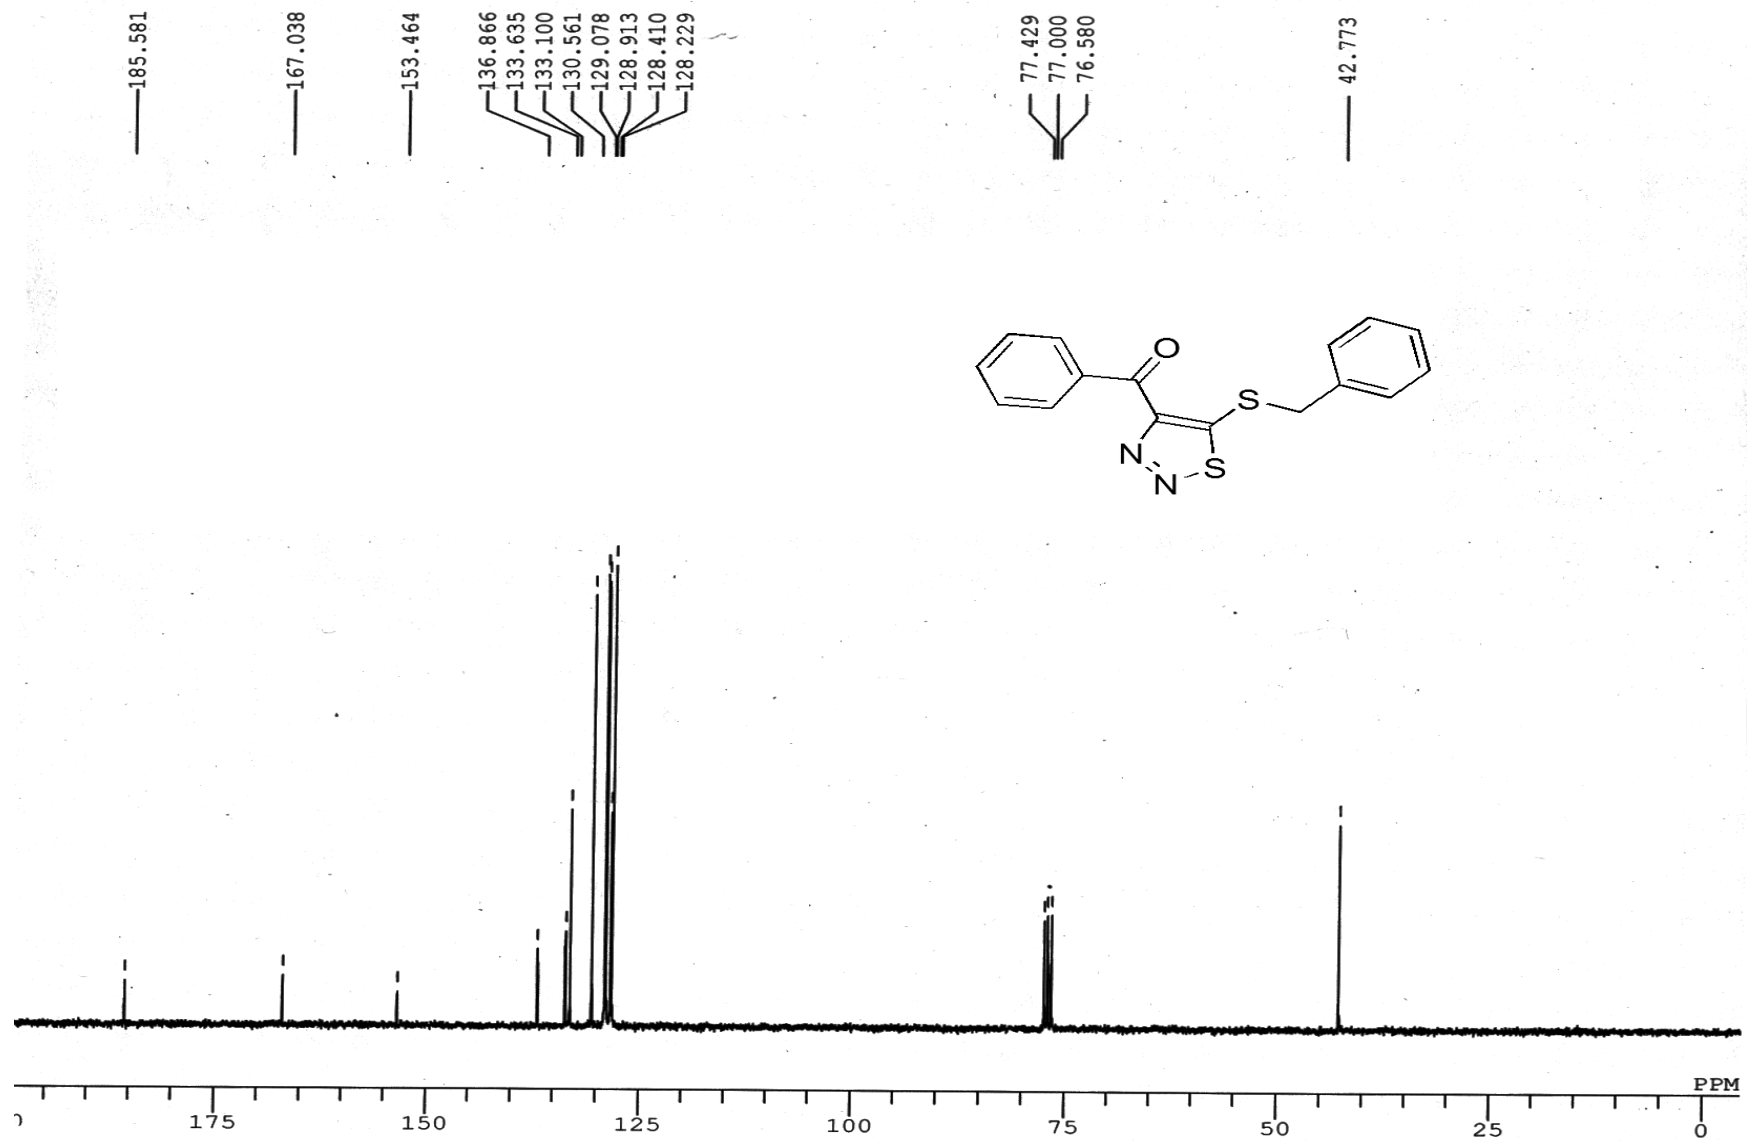

**28)  $^1\text{H}$  &  $^{13}\text{C}$  NMR Spectra of 5-Benzylsulfanyl-4-(2-naphthoyl)-1,2,3-thiadiazole (3gp):**

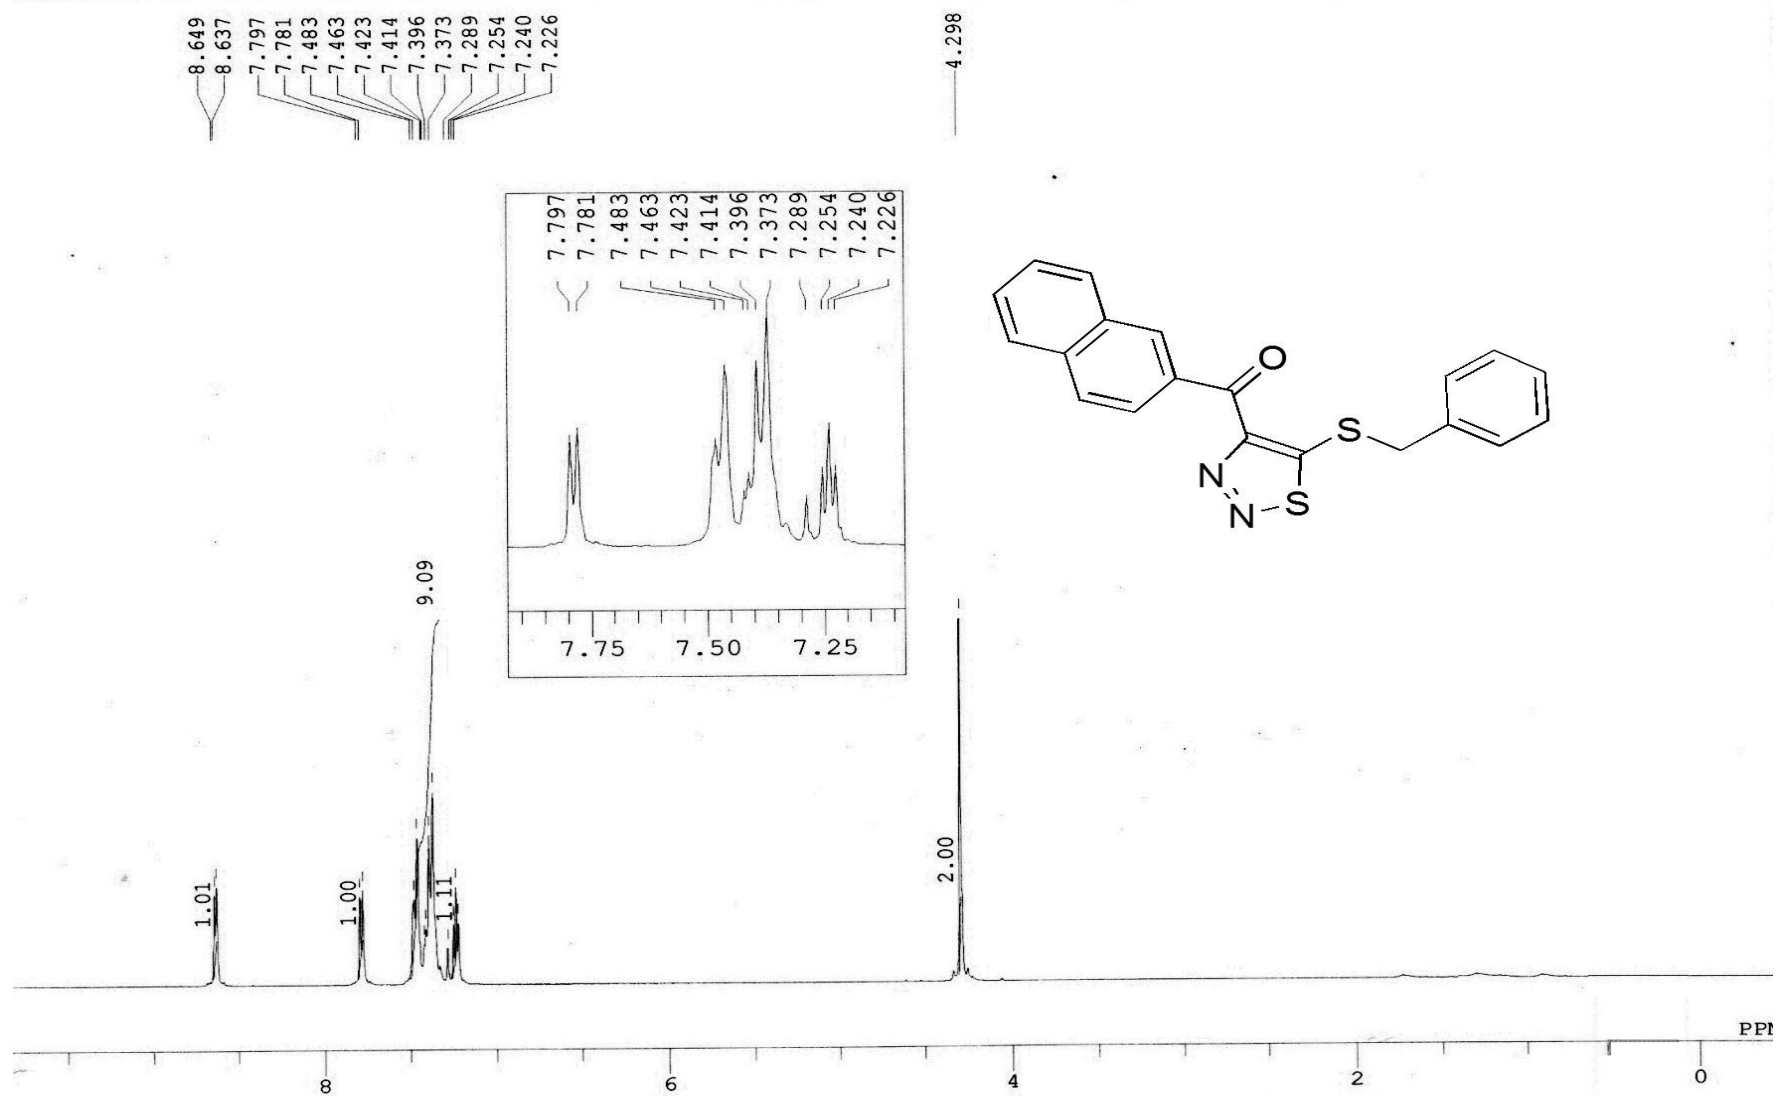



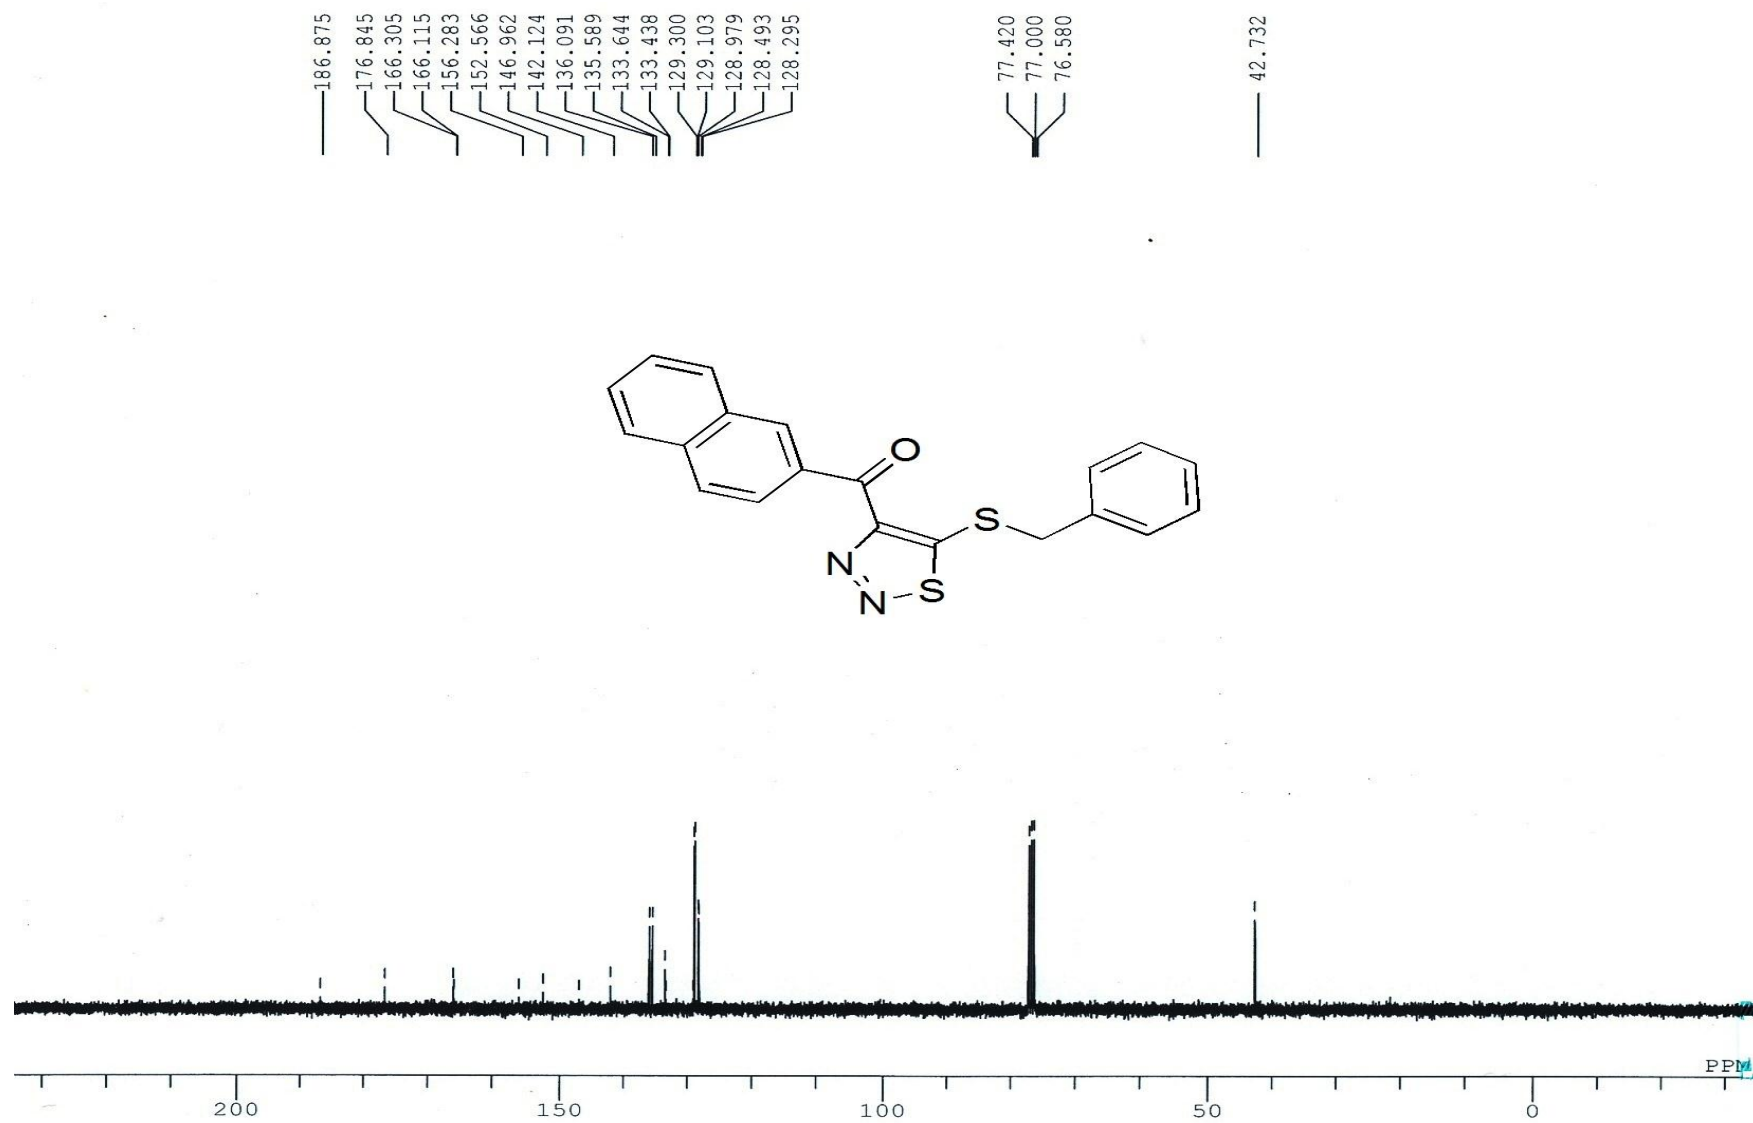

**29)  $^1\text{H}$  &  $^{13}\text{C}$  NMR Spectra of 5-Benzylsulfanyl-4-(2-thienoyl)-1,2,3-thiadiazole (3gf):**

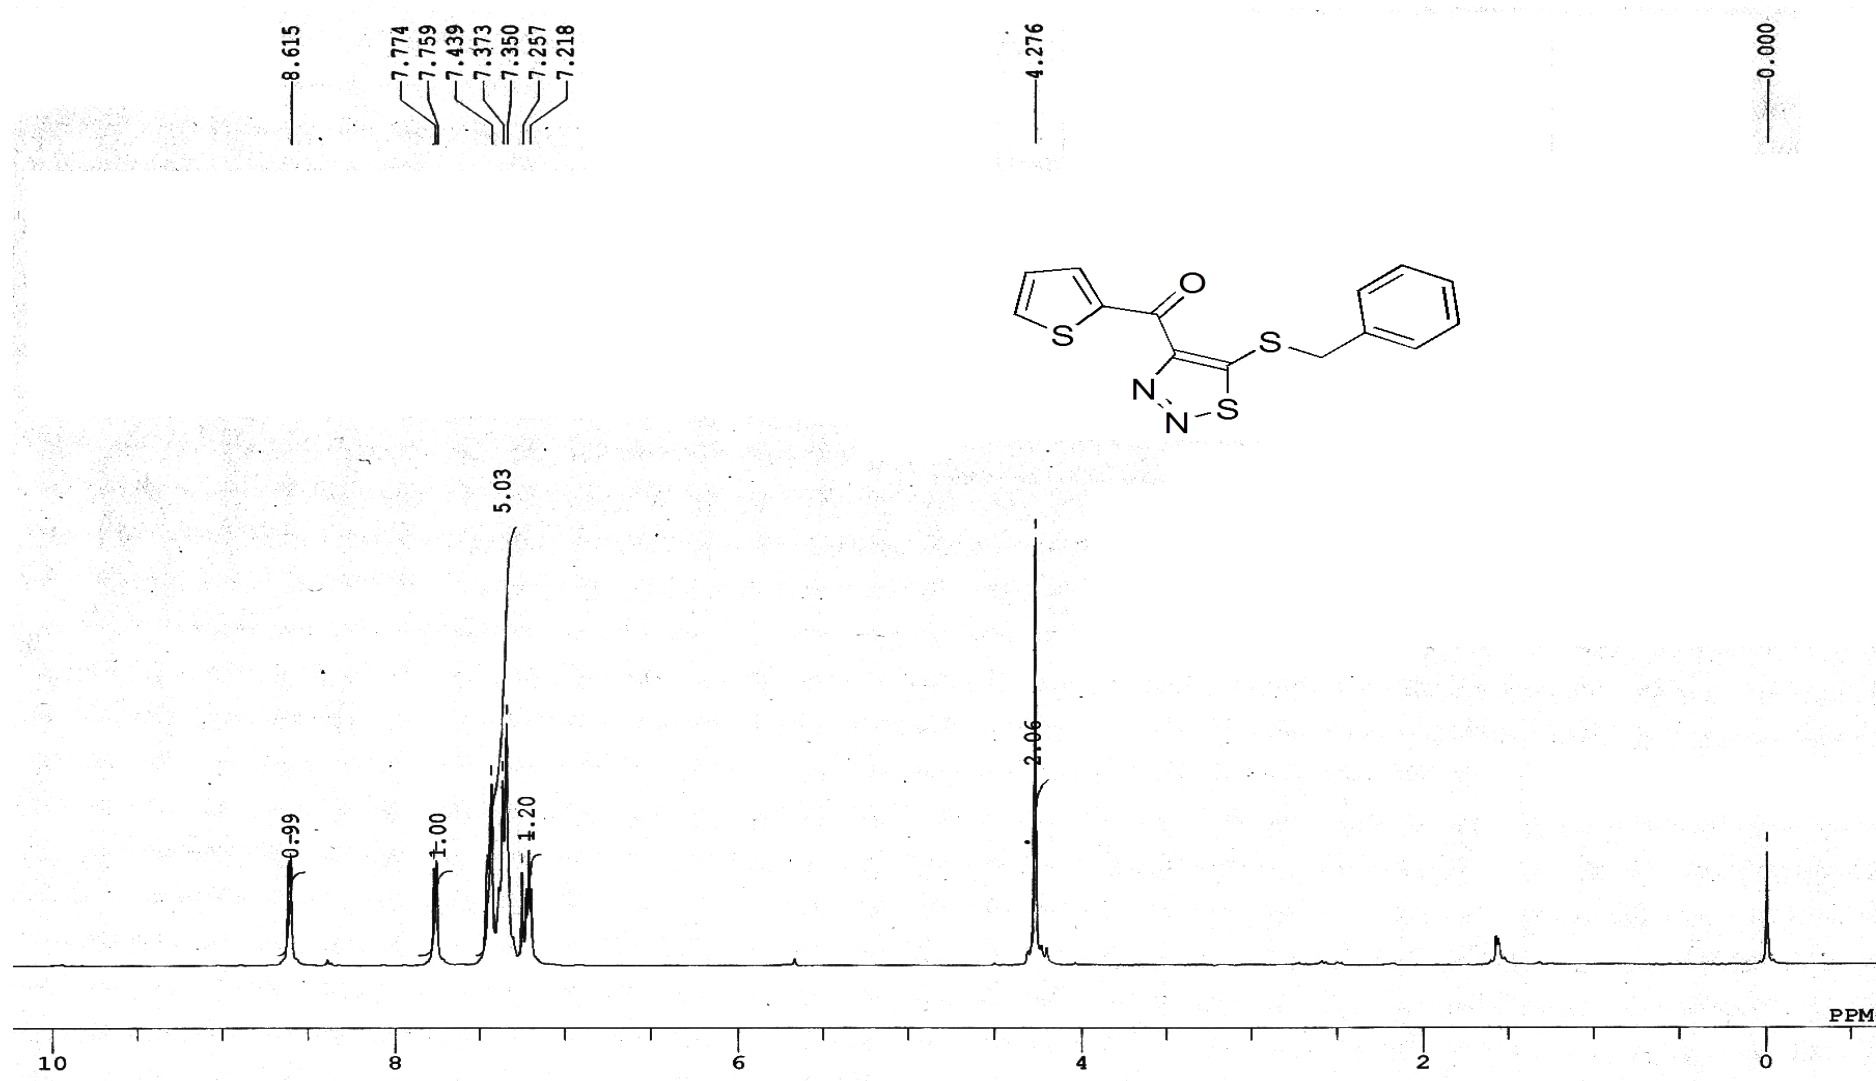

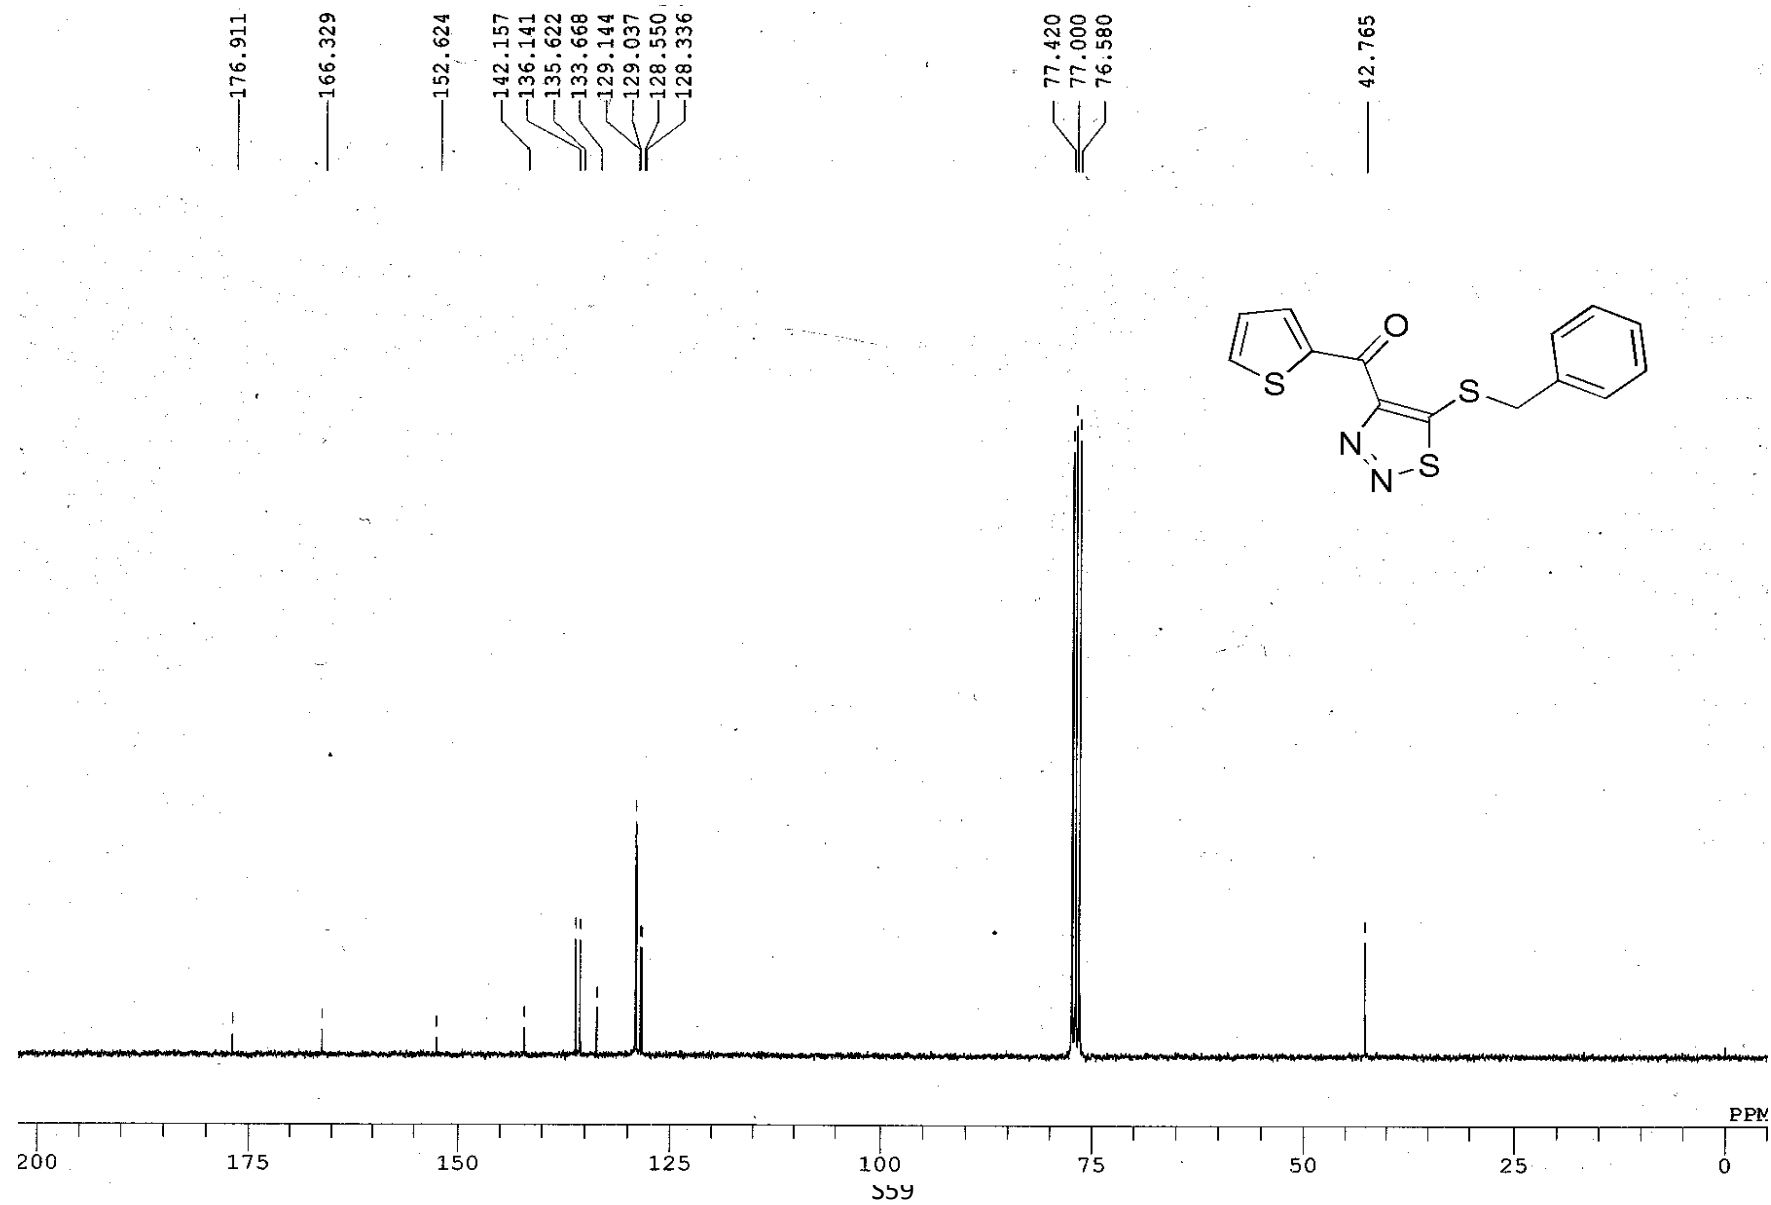

### 30) $^1\text{H}$ & $^{13}\text{C}$ NMR Spectra of 5-Benzylsulfanyl-4-(2-methyl-propan-1-oyl)-1,2,3-thiadiazole (3go):

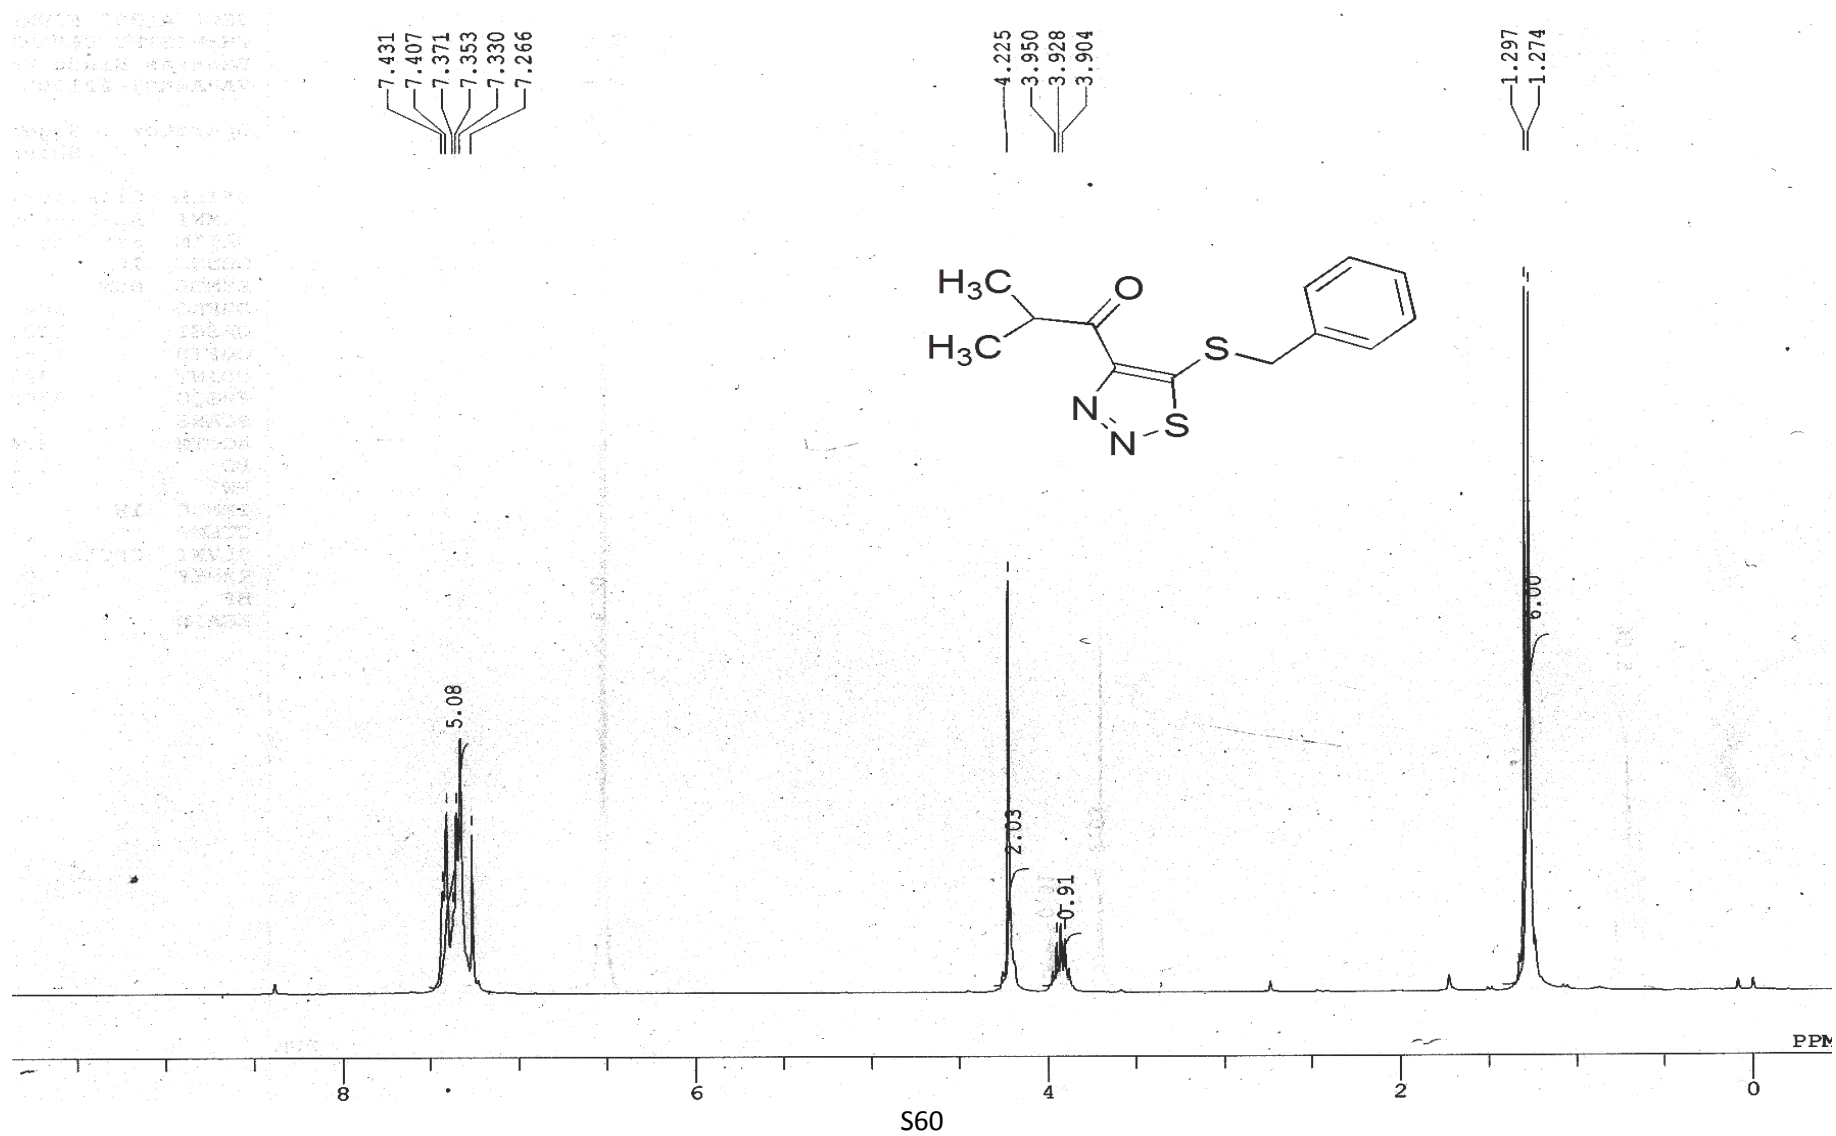

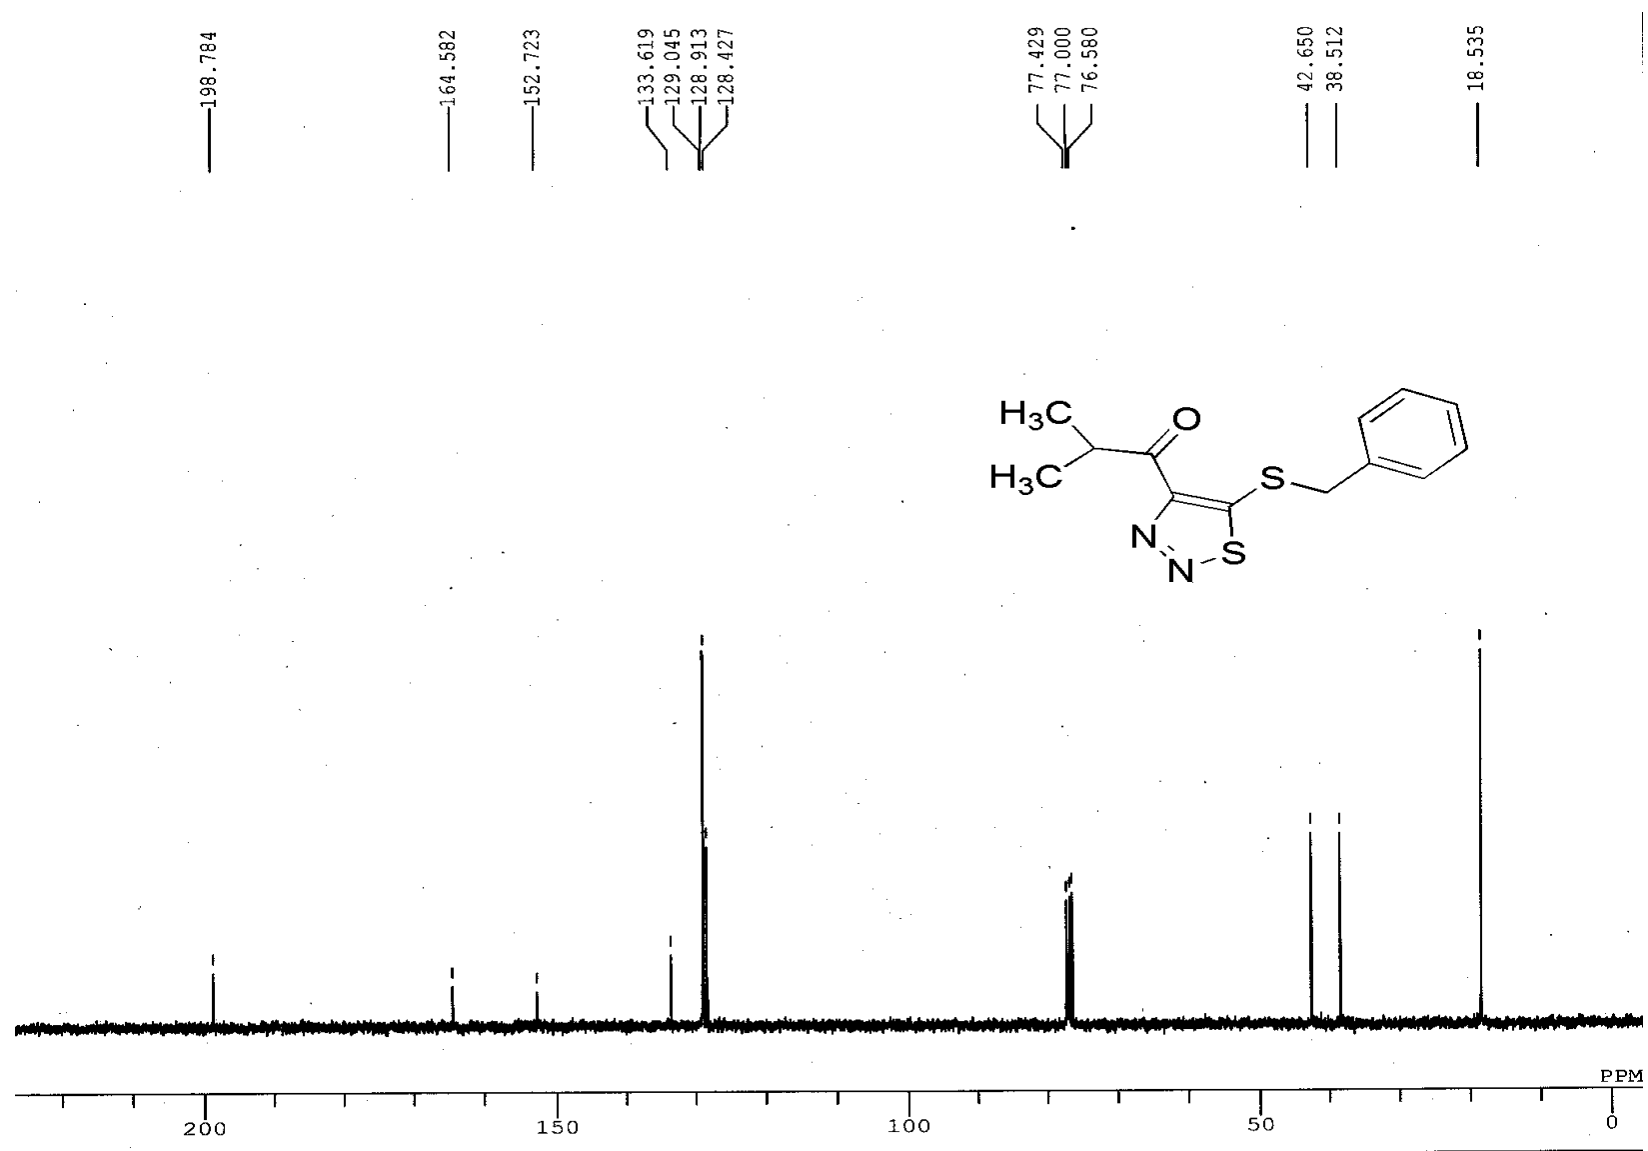

Supplement: c3gc37047j.pdf [file c3gc37047j.pdf]
